# Supplementary material for: Bioinformatic Approaches Including Predictive Metagenomic Profiling Reveal Characteristics of Bacterial Response to Petroleum Hydrocarbon Contamination in Diverse Environments
Source: PubMed Central journal article supplement (PMC5430712; doi:10.1038/s41598-017-01126-3), 2017-04-24
Supplement: 41598_2017_1126_MOESM1_ESM.pdf [file 41598_2017_1126_MOESM1_ESM.pdf]

# **Bioinformatic Approaches Including Predictive Metagenomic Profiling Reveal Characteristics of Bacterial Response to Petroleum Hydrocarbon Contamination in Diverse Environments**

Arghya Mukherjee, Bobby Chettri, James S. Langpoklakpam, Pijush Basak, Aravind Prasad,  
Ashis K. Mukherjee, Maitree Bhattacharyya, Arvind K. Singh and Dhrubajyoti Chattopadhyay

---

Supplementary Data



**Supplementary data. Figure S1. Taxonomic distribution of bacterial communities in oil contaminated environments.** Taxonomic clades detected at relative abundance  $\geq 2\%$  in at least one of 65 oil contaminated samples are represented. (A) Distribution at the phylum level, (B) Distribution at the order level.

**Supplementary data. Figure S2. Taxonomic biomarkers of bacterial communities from oil polluted habitats.**

Cladogram showing all taxonomic clades detected at a relative abundance  $\geq 0.5\%$  in at least five samples across all habitats. Abundances for these taxa were used as inputs for LEfSe which detected taxonomic biomarkers for each taxonomic level. Seven rings of the cladogram represent phylum (innermost), class, order, family, genus and species (outermost), respectively and are rooted using kingdoms Bacteria and Archaea. Annotations for taxonomic clades follow the reverse pattern, wherein phyla are annotated in the outermost section of the cladogram and lower taxonomic levels annotated further inside ending at the outermost circle in that section of the cladogram. Circles representing differentially abundant taxa detected as taxonomic biomarkers are colored according to the individual soil habitat wherein they are over-represented among 12 oil polluted ecosystems (see legend). Circles not over-represented in any habitat are colorless. Brackets represent a single taxon at that taxonomic level from which daughter taxa originate. Taxa with a single daughter taxon are joined using regular branches. More information on this style of representation can be found elsewhere <sup>28,36,83</sup>.

- Arctic (A)
- China oil refineries (C)
- India oil refineries (I)
- Mangrove (M)
- Marine sediments (DWH)
- Oil sands core (OSC)
- Oil sands tailings pond deep (OSTPd)
- Oil sands tailings pond median (OSTPm)
- Oil sands tailings pond upper (OSTPu)
- Taiga bottom active layer (Tb)
- Taiga permafrost layer (Tp)
- Taiga upper active layer (Tu)



- a: Sphingomonadaceae
- b: Acetobacteraceae
- c: Rhodospirillaceae
- d: Rhodobacteraceae
- e: Caulobacteraceae
- f: Geobacteraceae
- g: Desulfuromonadaceae
- h: Syntrophorhabdaceae
- i: Syntrophaceae
- j: Myxococcaceae
- k: Desulfobulbaceae
- l: Opitutaceae
- m: Chthoniobacteraceae
- n: Verrucomicrobiaceae
- o: Peptococcaceae
- p: Chitinophagaceae
- q: Weeksellaceae
- r: Cytophagaceae
- s: Dolo\_23
- t: Kouleothrixaceae
- u: Thermogemmatimonadaceae
- v: Anaerolinaceae
- w: Phycisphaeraceae
- x: Gemmataceae
- y: Planctomycetaceae
- z: Pirellulaceae

- A: Spirochaetes
- AA: Solirubrobacteraceae
- AB: Gaiellaceae
- AC: Iamiaceae
- AD: Microbacteriaceae
- AE: Sporichthyaceae
- AF: Nocardiaceae
- AG: Micromonosporaceae
- AH: Mycobacteriaceae
- AI: Nocardioideaceae
- AJ: Intrasporangiaceae
- AK: Propionibacteriaceae
- AL: Micrococcaceae
- AM: Geodermatophilaceae
- AN: Dietziaceae
- AO: Chlorobi
- AP: Ignavibacteriaceae
- AQ: Caldiserica
- AR: GN04
- AS: Nitrospirae
- AT: WS3
- AU: Gemmatimonadetes
- AV: WS6
- AW: mb2424
- AX: Ellin6075
- AY: Koribacteraceae
- AZ: Acidobacteriaceae
- B: Spirochaetaceae
- C: Cyanobacteria
- D: Oscillatoriophycideae
- E: Synechococcophycideae
- F: OP8
- G: TM7
- H: Colwelliaceae
- I: Alteromonadaceae
- J: Marinicellaceae
- K: Enterobacteriaceae
- L: Xanthomonadaceae
- M: Sinobacteraceae
- N: Pseudomonadaceae
- O: Moraxellaceae
- P: Alcaligenaceae
- Q: Burkholderiaceae
- R: Comamonadaceae
- S: Oxalobacteraceae
- T: Rhodocyclaceae
- U: Hydrogenophilaceae
- V: Brucellaceae
- W: Bradyrhizobiaceae
- X: Methylobacteriaceae
- Y: Hyphomicrobiaceae
- Z: Erythrobacteraceae

**Supplementary data. Figure S3. High-resolution cladogram of metabolic reconstruction of metagenomes and functional biomarkers from oil polluted habitats.** Cladogram showing the 4-level KEGG BRITE hierarchical structure denoted by four rings, as inferred against KEGG metabolic modules detected by HUMAnN2 from metagenomic gene family abundance data produced by PICRUSt for all oil contaminated samples. The outermost ring represents KEGG functional modules that have been detected in at least one of the 65 PICRUSt predicted metagenomes as reconstructed by HUMAnN2, while the innermost ring represents the Level 1 KEGG BRITE clades. Over-represented metabolic modules inferred from KEGG module abundance data generated by HUMAnN2 by LEfSe are colored corresponding to the oil contaminated habitat they have been identified to be differentially abundant in (see legend). Circles not over-represented in any habitat are colorless. Brackets represent a single KEGG BRITE clade at that Level from which daughter clades originate. KEGG BRITE clades with a single daughter clade are joined through regular branches. Annotations for the KEGG BRITE hierarchy follow an outside-in pattern, wherein Level 1 KEGG BRITE clades are annotated in the outermost section of the cladogram with lower clades annotated further inside ending at the outermost circle in that section of the cladogram. Core and Varied modules along with other differentially abundant KEGG BRITE clades are labelled. More information on this style of representation can be found elsewhere<sup>28,36,83</sup>.

- Arctic (A)
- China oil refineries (C)
- India oil refineries (I)
- Mangrove (M)
- Marine sediments (DWH)
- Oil sands core (OSC)
- Oil sands tailings pond deep (OSTPd)
- Oil sands tailings pond median (OSTPm)
- Oil sands tailings pond upper (OSTPu)
- Taiga bottom active layer (Tb)
- Taiga permafrost layer (Tp)
- Taiga upper active layer (Tu)



- I: Cell division transport system
- S: Phosphate transport system
- %: Putative ABC transport system
- &: Putative polar amino acid transport system
- 1: Glycerol transport system
- 2: Multidrug resistance, efflux pump VexEF-ToIC
- 3: Copper-processing system
- 4: Multidrug resistance, efflux pump GesABC
- 5: PRPP biosynthesis, ribose 5P => PRPP
- 6: Serine biosynthesis, glycerate-3P => serine
- 7: Succinate dehydrogenase, prokaryotes
- 8: Cytochrome d ubiquinol oxidase
- 9: F-type ATPase, prokaryotes and chloroplasts
- :: Peptides/nickel transport system
- <: Iron complex transport system
- >: Lipopolysaccharide transport system
- @: Ribosome, bacteria
- A: Histidine degradation, histidine => N-formiminoglutamate => glutamate
- AA: Cellular processes
- AB: Environmental information processing
- AC: Metabolism
- AD: Carbohydrate and lipid metabolism
- AE: Energy metabolism
- AF: Nucleotide and amino acid metabolism
- AG: Secondary metabolism
- AH: Gene set
- AI: Energy metabolism
- AJ: Environmental information processing
- AK: Genetic information processing
- AL: Cell signaling
- AM: Drug efflux transporter pump
- AN: Drug resistance
- AO: Two component regulatory system
- AP: Aminoacyl tRNA
- AQ: Nucleotide sugar
- AR: Central carbohydrate metabolism
- AS: Fatty acid metabolism
- AT: Glycan metabolism
- AU: Glycosaminoglycan metabolism
- AV: Lipid metabolism
- AW: Lipopolysaccharide metabolism
- AX: Other carbohydrate metabolism
- AY: Other terpenoid biosynthesis
- AZ: Sterol biosynthesis
- B: Tungstate transport system
- BA: Terpenoid backbone biosynthesis
- BB: Carbon fixation
- BC: Methane metabolism
- BD: Nitrogen metabolism
- BE: Sulfur metabolism
- BF: Arginine and proline metabolism
- BG: Aromatic amino acid metabolism
- BH: Branched chain amino acid metabolism
- BI: Cofactor and vitamin biosynthesis
- BJ: Cysteine and methionine metabolism
- BK: Histidine metabolism
- BL: Lysine metabolism
- BM: Other amino acid metabolism
- BN: Polyamine biosynthesis
- BO: Purine metabolism
- BP: Pyrimidine metabolism
- BQ: Serine and threonine metabolism
- BR: Aromatics degradation
- BS: Biosynthesis of secondary metabolites
- BT: Drug resistance
- BU: Metabolic capacity
- BV: Pathogenicity
- BY: ATP synthesis
- BZ: Photosynthesis
- C: Putative sn-glycerol-phosphate transport system
- CA: ABC 2 type and other transport systems
- CB: Bacterial secretion system
- CC: Drug efflux transporter pump
- CD: Metallic cation, iron siderophore and vitamin B12 transport system
- CE: Mineral and organic ion transport system
- CF: Peptide and nickel transport system
- CG: Phosphate and amino acid transport system
- CH: Phosphotransferase system (PTS)
- CI: Saccharide, polyol, and lipid transport system
- CK: Proteasome
- CL: Protein processing
- CM: Repair system
- CO: Ribosome
- CQ: RNA processing
- D: Glycine betaine/proline transport system
- E: Osmoprotectant transport system
- F: Putative ABC transport system
- G: D-Xylose transport system
- H: Multiple sugar transport system
- I: Glutamate/aspartate transport system
- J: General L-amino acid transport system
- K: Glutamate transport system
- L: Zinc transport system
- M: Manganese/iron transport system
- N: Putative zinc/manganese transport system
- O: Cobalt/nickel transport system
- P: Putative ABC transport system
- Q: Capsular polysaccharide transport system
- R: Lipooligosaccharide transport system
- S: Heme transport system
- T: Spermidine/putrescine transport system
- U: Urea transport system
- V: Adhesin protein transport system
- W: Bacterial proteasome
- X: Microcin C transport system
- Y: C10-C20 isoprenoid biosynthesis, archaea
- Z: Cytochrome o ubiquinol oxidase
- [: Symbiosis
- \: Lipopolysaccharide export system
- ] : Replication system
- ^: Phosphonate transport system
- a: Sulfonate transport system
- b: Oligopeptide transport system
- bw: Plant pathogenicity
- c: SenX3-RegX3 (phosphate starvation response) two-component regulatory system
- cj: DNA polymerase
- cp: RNA polymerase
- cr: Spliceosome
- ct: EnvZ-OmpR (osmotic stress response) two-component regulatory system
- e: RstB-RstA two-component regulatory system
- f: CreC-CreB (phosphate regulation) two-component regulatory system
- g: BaeS-BaeR (envelope stress response) two-component regulatory system
- h: QseC-QseB (quorum sensing) two-component regulatory system
- i: TctE-TctD (tricarboxylic acid transport) two-component regulatory system
- j: NarX-NarL (nitrate respiration) two-component regulatory system
- k: DesK-DesR (membrane lipid fluidity regulation) two-component regulatory system
- l: AlgZ-AlgR (alginate production) two-component regulatory system
- m: GlnL-GlnG (nitrogen regulation) two-component regulatory system
- n: NtrY-NtrX (nitrogen regulation) two-component regulatory system
- o: HydH-HydG (metal tolerance) two-component regulatory system
- p: PilS-PilR (type 4 fimbriae synthesis) two-component regulatory system
- q: GlnK-GlnR (amino sugar metabolism) two-component regulatory system
- r: DctB-DctD (C4-dicarboxylate transport) two-component regulatory system
- s: CckA-CtrA/CpdR (cell cycle control) two-component regulatory system
- t: ChvG-ChvI (acidity sensing) two-component regulatory system
- u: RegB-RegA (redox response) two-component regulatory system
- v: FixL-FixJ (nitrogen fixation) two-component regulatory system
- w: Benzoate degradation, benzoate => catechol / methylbenzoate => methylcatechol
- x: Nucleotide sugar biosynthesis, galactose => UDP-galactose
- y: Biotin transport system
- z: Putative aldouronate transport system
- {: Lipoprotein-releasing system
- |: ABC-2 type transport system
- : Branched-chain amino acid transport system

**Supplementary data. Figure S4. Core and varied modules of metagenomes from oil contaminated habitats.** Heat-map showing a subset of KEGG modules detected as core modules (significant presence i.e. coverage of > 90% across all habitats) and varied modules (significant presence i.e. coverage of > 90% in some habitats and significant absence i.e. coverage of < 10% in others). PICRUSt predicted metagenomes were supplied to HUMAnN2, which calculated coverage for each detected KEGG module using MinPath. Most KEGG modules showed a coverage of 0.1-0.9 and were labelled as non-significant presence/absence and are not shown here. Darker regions of the heat-map represent greater coverage while lighter regions represent lower coverage of the corresponding KEGG module. Habitats are denoted by corresponding colours (see legend) at the top of the heatmap and labels at the bottom.



- Arctic(A)
- China oil refineries(C)
- India oil refineries(I)
- Mangrove(M)
- Marine sediments (DWH)
- Oil sands core (OSC)
- Oil sands tailings pond deep (OSTPd)
- Oil sands tailings pond median (OSTPm)
- Oil sands tailings pond upper (OSTPU)
- Taiga bottom active layer (Tb)
- Taiga permafrost layer (Tp)
- Taiga upper active layer (Tu)



Marine sediments  
 Mangrove  
 Arctic  
 Taiga upper active layer  
 Taiga bottom active layer  
 Taiga permafrost layer  
 India oil refineries  
 China oil refineries  
 Oil sands tailings pond median  
 Oil sands tailings pond deep  
 Oil sands core  
 Oil sands core

M00330: Adhesion protein transport system  
 M00449: CreC-CreB (phosphate regulation) two-component regulatory system  
 M00502: GtrK-GtrE (amino sugar metabolism) two-component regulatory system  
 M00607: Glycerol transport system  
 M00450: BaeS-BaeR (envelope stress response) two-component regulatory system  
 M00446: RstB-RstA two-component regulatory system  
 M00551: Benzoate degradation, benzoate -> catechol / methylbenzoate -> methylcatechol  
 MM00365: C10-C20 isoprenoid biosynthesis, archaea  
 M00216: Multiple sugar transport system  
 M00215: D-Xylose transport system  
 M00443: SenX3-RegX3 (phosphate starvation response) two-component regulatory system  
 M00243: Manganese/iron transport system  
 M00342: Bacterial proteasome  
 M00603: Putative alduronate transport system  
 M00233: Glutamate transport system  
 M00479: DesK-DesR (membrane lipid fluidity regulation) two-component regulatory system  
 M00249: Capsular polysaccharide transport system  
 M00524: FixJ-FixK (nitrogen fixation) two-component regulatory system  
 M00512: CsaA-CsaY/GsaR (cell cycle control) two-component regulatory system  
 M00520: ChvG-ChvI (acidity sensing) two-component regulatory system  
 M00504: DctD-DctD (C4-dicarboxylate transport) two-component regulatory system  
 M00417: Cytochrome o ubiquinol oxidase  
 M00232: General L-amino acid transport system  
 M00436: Sulfate transport system  
 M00768: Multidrug resistance, efflux pump GesABC  
 M00581: Biotin transport system  
 M00323: Urea transport system  
 M00720: Multidrug resistance, efflux pump VexEF-ToiC  
 M00405: Histidine degradation, histidine -> N-formiminoglutamate -> glutamate  
 M00439: Oligopeptide transport system  
 M00209: Osmoprotectant transport system  
 M00244: Putative zinc/manganese transport system  
 M00242: Zinc transport system  
 M00208: Glycine betaine/proline transport system  
 M00501: Pils-PIR (type 4 fibrinase synthesis) two-component regulatory system  
 M00499: Hyh-HyE (metal tolerance) two-component regulatory system  
 M00245: Cobalt/nickel transport system  
 M00247: Putative ABC transport system  
 M00230: Glutamates/aspartate transport system  
 M00198: Putative on-glycerol phosphate transport system  
 M00554: Nucleotide sugar biosynthesis, galactose -> UDP-galactose  
 M00762: Copper-processing system  
 M00211: Putative ABC transport system  
 M00186: Tungstate transport system  
 M00252: Lipooligosaccharide transport system  
 M00493: Alg2-AlgI (alginate production) two-component regulatory system  
 M00457: TctE-TctD (tricarboxylic acid transport) two-component regulatory system  
 M00471: NarX-NarI (nitrate respiration) two-component regulatory system  
 M00349: Microcin C transport system  
 M00453: QseC-QseB (quorum sensing) two-component regulatory system  
 M00259: Heme transport system  
 M00498: NtrY-NtrX (nitrogen regulation) two-component regulatory system  
 M00299: Spermidine/putrescine transport system  
 M00523: RegB-RegA (redox response) two-component regulatory system  
 M00445: EnvZ-OmpR (osmotic stress response) two-component regulatory system  
 M00497: GlnK-GlnG (nitrogen regulation) two-component regulatory system  
 M00178: Ribosome, bacteria  
 M00222: Phosphate transport system  
 M00239: Peptidase/nickel transport system  
 M00230: Lipopolysaccharide export system  
 M00258: Putative ABC transport system  
 M00149: Succinate dehydrogenase, prokaryotes  
 M00223: Phosphonate transport system  
 M00255: Lipoprotein-releasing system  
 M00237: Branched-chain amino acid transport system  
 M00153: Cytochrome d ubiquinol oxidase  
 M00240: Iron complex transport system  
 M00005: PRPP biosynthesis, ribose 5P -> PRPP  
 M00020: Serine biosynthesis, glycinate-3P -> serine  
 M00254: ABC-2 type transport system  
 M00256: Cell division transport system  
 M00188: NtrT/NtrU family transport system  
 M00236: Putative polar amino acid transport system  
 M00250: Lipopolysaccharide transport system  
 M00157: F-type ATPase, prokaryotes and chloroplasts

**Supplementary data. Figure S5. Metagenome contributions of OTUs at family and genus level for select hydrocarbonoclastic genes as estimated by PICRUSt.** Metagenome predicted by PICRUSt was used as input to *plot\_metagenome\_contributions.R* script. OTUs contributing  $\geq 2\%$  to the abundance of a particular hydrocarbonoclastic gene in a particular sample were retained for graphing. Graphs were generated in R with ggplot2. Taxa mentioned in text are marked with ‡.



# Metagenome contributions: Alkane-1 monooxygenase (K00496): Genus



Metagenome contributions: Protocatechuate-4,5 dioxygenase  $\alpha$  chain ( K04100): Family





Metagenome contributions: Protocatechuate-4,5 dioxygenase  $\beta$  chain ( K04101): Family



# Metagenome contributions: Protocatechuate-4,5 dioxygenase $\beta$ chain ( K04101): Genus





Metagenome contributions: Catechol-1,2 dioxygenase (K03381): Genus



Metagenome contributions: Catechol-2,3 dioxygenase (K00446): Family



# Metagenome contributions: Catechol-2,3 dioxygenase (K00446): Genus



Metagenome contributions: Protocatechuate-3,4 dioxygenase  $\alpha$  chain (K00448): Family



Metagenome contributions: Protocatechuate-3,4 dioxygenase  $\alpha$  chain (K00448): Genus



# Metagenome contributions: Protocatechuate-3,4 dioxygenase $\beta$ chain (K00449): Family



# Metagenome contributions: Protocatechuate-3,4 dioxygenase $\beta$ chain (K00449): Genus





Metagenome contributions: Gentsiate-1,2 dioxygenase (K00450): Genus



# Metagenome contributions: Homogentisate-1,2 dioxygenase (K00451): Family



# Metagenome contributions: Homogentisate-1,2 dioxygenase (K00451): Genus



**Supplementary data. Figure S6. Comparison between taxonomic and functional characterization of Marine sediments (DWH) carried out by Mason et al.<sup>54</sup> and in this study.** (A) Relative abundances of taxonomic clades identified as biomarkers in this study were compared with relative abundances in the parent study by Mason et al., (B) Relative abundances of 110 KEGG orthologs implicated in xenobiotics degradation as per the KEGG BRITE hierarchy were compared for shotgun sequencing metagenomes and PICRUSt predicted metagenomes from the study by Mason et al. and this study respectively, (C) Abundances of 8 select KEGG orthologs were compared for metagenomic and PICRUSt predicted data from the study by Mason et al. and this study respectively using counts normalized for 1,000,000 reads. All boxplots were computed in R using the ggplot2 package.

(A)



(B)



(C)



**Supplementary data. Table S1. Complete description of 16S rRNA amplicon sequence datasets used in this study.**

| Biome type | ID  | Original ID            | Location                       | Depth of sample collection (cm below surface) | Accession numbers and/or web links for data download |           | Reference                 |
|------------|-----|------------------------|--------------------------------|-----------------------------------------------|------------------------------------------------------|-----------|---------------------------|
|            |     |                        |                                |                                               | SRA Run ID                                           | Web links |                           |
| Urban      | I1  | Noonmati_Surface       | Guwahati, Assam, India         | 0-10                                          | SRR3168574                                           |           | This study                |
| Urban      | I2  | Noonmati_Deep          | Guwahati, Assam, India         | 20-30                                         | SRR3168575                                           |           | This study                |
| Urban      | I3  | Barhola_Surface        | Barhola, Assam, India          | 0-10                                          | SRR3168576                                           |           | This study                |
| Urban      | I4  | Barhola_Deep           | Barhola, Assam, India          | 20-30                                         | SRR3168577                                           |           | This study                |
| Arctic     | A1  | AH1d1, AH1d2           | Axel Heiburg, Nunavut, Canada  | 0-15                                          | SRR640619-20                                         |           | Bell et al. <sup>84</sup> |
| Arctic     | A2  | AK1d1, AK1d2, AK1d3    | Toolik Lake, Alaska, USA       | 0-15                                          | SRR640636-38                                         |           | Bell et al. <sup>84</sup> |
| Arctic     | A3  | AL1d1, AL1d2, AL1d3    | Alert, Nunavut, Canada         | 0-15                                          | SRR640662-64                                         |           | Bell et al. <sup>84</sup> |
| Arctic     | A4  | AVKd1, AVKd2, AVKd3    | Akulivik, Quebec, Canada       | 0-15                                          | SRR640689-91                                         |           | Bell et al. <sup>84</sup> |
| Arctic     | A5  | BDEd1, BDEd2, BDEd3    | Baie Deception, Quebec, Canada | 0-15                                          | SRR640698-700                                        |           | Bell et al. <sup>84</sup> |
| Arctic     | A6  | BY1d1, BY1d2, BY1d3    | Bylot Island, Nunavut, Canada  | 0-15                                          | SRR640707-09                                         |           | Bell et al. <sup>84</sup> |
| Arctic     | A7  | EBAAd1, EBAAd2, EBAAd3 | East Bay, Nunavut, Canada      | 0-15                                          | SRR640725-27                                         |           | Bell et al. <sup>84</sup> |
| Arctic     | A8  | IQAd1, IQAd2, IQAd3    | Iqaluit, Nunavut, Canada       | 0-15                                          | SRR640734-36                                         |           | Bell et al. <sup>84</sup> |
| Arctic     | A9  | NORd1, NORd2, NORd3    | Tromso, Norway                 | 0-15                                          | SRR640743-45                                         |           | Bell et al. <sup>84</sup> |
| Arctic     | A10 | RANd1, RANd2, RANd3    | Rankin Inlet, Nunavut, Canada  | 0-15                                          | SRR640752-54                                         |           | Bell et al. <sup>84</sup> |
| Arctic     | A11 | RUSd1, RUSd2, RUSd3    | Yamal, Russia                  | 0-15                                          | SRR640761-63                                         |           | Bell et al. <sup>84</sup> |
| Arctic     | A12 | THUd1, THUd2, THUd3    | Thule, Greenland               | 0-15                                          | SRR640770-72                                         |           | Bell et al. <sup>84</sup> |
| Urban      | C1  | CQM1                   | Changqing, China               | 2-10                                          | SRX731327                                            |           | Sun et al. <sup>85</sup>  |
| Urban      | C2  | CQM2                   | Changqing, China               | 2-10                                          | SRX731327                                            |           | Sun et al. <sup>85</sup>  |
| Urban      | C3  | CQM3                   | Changqing, China               | 2-10                                          | SRX731327                                            |           | Sun et al. <sup>85</sup>  |
| Urban      | C4  | DQM3                   | Daqing, China                  | 2-10                                          | SRX731327                                            |           | Sun et al. <sup>85</sup>  |
| Urban      | C5  | DQM4                   | Daqing, China                  | 2-10                                          | SRX731327                                            |           | Sun et al. <sup>85</sup>  |
| Urban      | C6  | DQM5                   | Daqing, China                  | 2-10                                          | SRX731327                                            |           | Sun et al. <sup>85</sup>  |
| Urban      | C7  | DQM12                  | Daqing, China                  | 2-10                                          | SRX731327                                            |           | Sun et al. <sup>85</sup>  |
| Urban      | C8  | DQM50                  | Daqing, China                  | 2-10                                          | SRX731327                                            |           | Sun et al. <sup>85</sup>  |

|                 |      |                                |                                               |                  |                                      |                                                                                                                                                 |                                 |
|-----------------|------|--------------------------------|-----------------------------------------------|------------------|--------------------------------------|-------------------------------------------------------------------------------------------------------------------------------------------------|---------------------------------|
| Urban           | C9   | DQM200                         | Daqing, China                                 | 2-10             | SRX731327                            |                                                                                                                                                 | Sun et al. <sup>85</sup>        |
| Mangrove        | M1   | T23 2% I, T23 2% II            | Restinga da Marambaia, Rio de Janeiro, Brazil | 0-20             | HM602044–HM622061, HQ457546–HQ462469 |                                                                                                                                                 | dos Santos et al. <sup>53</sup> |
| Mangrove        | M2   | T66 2% I, T66 2% II            | Restinga da Marambaia, Rio de Janeiro, Brazil | 0-20             | HM602044–HM622061, HQ457546–HQ462469 |                                                                                                                                                 | dos Santos et al. <sup>53</sup> |
| Mangrove        | M3   | T23 5% I, T23 5% II            | Restinga da Marambaia, Rio de Janeiro, Brazil | 0-20             | HM602044–HM622061, HQ457546–HQ462469 |                                                                                                                                                 | dos Santos et al. <sup>53</sup> |
| Marine sediment | DWH1 | SE-20101001-GY-LBNL1-BC-120    | Gulf of Mexico                                | 0-1 <sup>#</sup> |                                      | <a href="http://mason.eoas.fsu.edu/DWH_sediment/16S_rRNA_gene_iTag_reads/">http://mason.eoas.fsu.edu/DWH_sediment/16S_rRNA_gene_iTag_reads/</a> | Mason et al. <sup>54</sup>      |
| Marine sediment | DWH2 | SE-20101001-GY-ALTNF001-BC-139 | Gulf of Mexico                                | 0-1 <sup>#</sup> |                                      | <a href="http://mason.eoas.fsu.edu/DWH_sediment/16S_rRNA_gene_iTag_reads/">http://mason.eoas.fsu.edu/DWH_sediment/16S_rRNA_gene_iTag_reads/</a> | Mason et al. <sup>54</sup>      |
| Marine sediment | DWH3 | SE-20101001-GY-NF006MOD-BC-143 | Gulf of Mexico                                | 0-1 <sup>#</sup> |                                      | <a href="http://mason.eoas.fsu.edu/DWH_sediment/16S_rRNA_gene_iTag_reads/">http://mason.eoas.fsu.edu/DWH_sediment/16S_rRNA_gene_iTag_reads/</a> | Mason et al. <sup>54</sup>      |
| Marine sediment | DWH4 | SE-20101017-GY-D031S-BC-278    | Gulf of Mexico                                | 0-1 <sup>#</sup> |                                      | <a href="http://mason.eoas.fsu.edu/DWH_sediment/16S_rRNA_gene_iTag_reads/">http://mason.eoas.fsu.edu/DWH_sediment/16S_rRNA_gene_iTag_reads/</a> | Mason et al. <sup>54</sup>      |
| Marine sediment | DWH5 | SE-20101017-GY-D040S-BC-315    | Gulf of Mexico                                | 0-1 <sup>#</sup> |                                      | <a href="http://mason.eoas.fsu.edu/DWH_sediment/16S_rRNA_gene_iTag_reads/">http://mason.eoas.fsu.edu/DWH_sediment/16S_rRNA_gene_iTag_reads/</a> | Mason et al. <sup>54</sup>      |
| Marine sediment | DWH6 | SE-20101017-GY-D038SW-BC-331   | Gulf of Mexico                                | 0-1 <sup>#</sup> |                                      | <a href="http://mason.eoas.fsu.edu/DWH_sediment/16S_rRNA_gene_iTag_reads/">http://mason.eoas.fsu.edu/DWH_sediment/16S_rRNA_gene_iTag_reads/</a> | Mason et al. <sup>54</sup>      |
| Marine sediment | DWH7 | SE-20101017-GY-D042S-BC-350    | Gulf of Mexico                                | 0-1 <sup>#</sup> |                                      | <a href="http://mason.eoas.fsu.edu/DWH_sediment/16S_rRNA_gene_iTag_reads/">http://mason.eoas.fsu.edu/DWH_sediment/16S_rRNA_gene_iTag_reads/</a> | Mason et al. <sup>54</sup>      |
| Taiga           | Tu1  | 1330                           | Walagan, China                                | 20-30            | SRR1055249                           |                                                                                                                                                 | Yang et al. <sup>13</sup>       |
| Taiga           | Tu2  | 2330                           | Walagan North, China                          | 20-30            | SRR1055249                           |                                                                                                                                                 | Yang et al. <sup>13</sup>       |
| Taiga           | Tu3  | 3330                           | Taiyuan, China                                | 20-30            | SRR1055249                           |                                                                                                                                                 | Yang et al. <sup>13</sup>       |
| Taiga           | Tu4  | 4330                           | Jiagedaqi, China                              | 20-30            | SRR1055249                           |                                                                                                                                                 | Yang et al. <sup>13</sup>       |
| Taiga           | Tb1  | 1530                           | Walagan, China                                | 70-80            | SRR1180575                           |                                                                                                                                                 | Yang et al. <sup>13</sup>       |
| Taiga           | Tb2  | 2530                           | Walagan North, China                          | 70-80            | SRR1180576                           |                                                                                                                                                 | Yang et al. <sup>13</sup>       |
| Taiga           | Tb3  | 3530                           | Taiyuan, China                                | 70-80            | SRR1180577                           |                                                                                                                                                 | Yang et al. <sup>13</sup>       |
| Taiga           | Tb4  | 4530                           | Jiagedaqi, China                              | 70-80            | SRR1180578                           |                                                                                                                                                 | Yang et al. <sup>13</sup>       |
| Taiga           | Tp1  | 1630                           | Walagan, China                                | 140-150          | SRR1180579                           |                                                                                                                                                 | Yang et al. <sup>13</sup>       |
| Taiga           | Tp2  | 2630                           | Walagan North, China                          | 140-150          | SRR1180580                           |                                                                                                                                                 | Yang et al. <sup>13</sup>       |

|        |        |                                                  |                  |             |            |  |                           |
|--------|--------|--------------------------------------------------|------------------|-------------|------------|--|---------------------------|
| Taiga  | Tp3    | 3630                                             | Taiyuan, China   | 140-150     | SRR1180581 |  | Yang et al. <sup>13</sup> |
| Taiga  | Tp4    | 4630                                             | Jiagedaqi, China | 140-150     | SRR1180582 |  | Yang et al. <sup>13</sup> |
| Arctic | OSC1   | 2010Suncor Oil Sands Core Run 11<br>Subsample 1  | Alberta, Canada  | 2,985-2,990 | SRR573815  |  | An et al. <sup>12</sup>   |
| Arctic | OSC3   | 2010Suncor Oil Sands Core Run 11<br>Subsample 3  | Alberta, Canada  | 2,985-2,990 | SRR573817  |  | An et al. <sup>12</sup>   |
| Arctic | OSC4   | 2010Suncor Oil Sands Core Run 11<br>Subsample 4  | Alberta, Canada  | 2,985-2,990 | SRR573818  |  | An et al. <sup>12</sup>   |
| Arctic | OSC5   | 2010Suncor Oil Sands Core Run 11<br>Subsample 5  | Alberta, Canada  | 2,985-2,990 | SRR573819  |  | An et al. <sup>12</sup>   |
| Arctic | OSC7   | 2010Suncor Oil Sands Core Run 11<br>Subsample 7  | Alberta, Canada  | 2,985-2,990 | SRR573821  |  | An et al. <sup>12</sup>   |
| Arctic | OSC9   | 2010Suncor Oil Sands Core Run 11<br>Subsample 9  | Alberta, Canada  | 2,985-2,990 | SRR573823  |  | An et al. <sup>12</sup>   |
| Arctic | OSC12  | 2010Suncor Oil Sands Core Run 11<br>Subsample 13 | Alberta, Canada  | 2,985-2,990 | SRR573826  |  | An et al. <sup>12</sup>   |
| Arctic | OSTPu1 | 2009Suncor Tailings Pond 5 (6.5 ft)              | Alberta, Canada  | 200         | SRR572718  |  | An et al. <sup>12</sup>   |
| Arctic | OSTPu2 | 2009Suncor Tailings Pond 5 (8.0 ft)              | Alberta, Canada  | 240         | SRR573715  |  | An et al. <sup>12</sup>   |
| Arctic | OSTPu3 | 2010Syn crude Tailings Pond MLSB<br>M MFT - 1m   | Alberta, Canada  | 100         | SRR573789  |  | An et al. <sup>12</sup>   |
| Arctic | OSTPu4 | 2010Syn crude Tailings Pond MLSB N<br>MFT - 1.1m | Alberta, Canada  | 110         | SRR573780  |  | An et al. <sup>12</sup>   |
| Arctic | OSTPm2 | 2009Suncor Tailings Pond 5 (25 ft)               | Alberta, Canada  | 750         | SRR573718  |  | An et al. <sup>12</sup>   |
| Arctic | OSTPm4 | 011Suncor Tailings Pond 6 (7 m)                  | Alberta, Canada  | 700         | SRR573772  |  | An et al. <sup>12</sup>   |
| Arctic | OSTPm6 | 2010Syn crude Tailings Pond MLSB N<br>MFT - 6.1m | Alberta, Canada  | 610         | SRR573782  |  | An et al. <sup>12</sup>   |
| Arctic | OSTPd1 | 2009Suncor Tailings Pond 5 (40 ft)               | Alberta, Canada  | 1220        | SRR573736  |  | An et al. <sup>12</sup>   |
| Arctic | OSTPd2 | 2009Suncor Tailings Pond 5 (45 ft)               | Alberta, Canada  | 1370        | SRR573737  |  | An et al. <sup>12</sup>   |
| Arctic | OSTPd3 | 2010Suncor Tailings Pond 6 (12 m)                | Alberta, Canada  | 1200        | SRR573759  |  | An et al. <sup>12</sup>   |
| Arctic | OSTPd4 | 2011Suncor Tailings Pond 6 (13 m)                | Alberta, Canada  | 1300        | SRR573775  |  | An et al. <sup>12</sup>   |

#All samples collected at an average of ~1500 metres below sea level, depth given is from surface of ocean floor marine sediment.

**Supplementary data. Table S2. Taxonomic profile of oil polluted environments as estimated through mothur in the present study.** Relative abundances for taxonomic clades were inferred from 16S rRNA data by mothur. Taxonomic classification was carried out using May 2013 release of Greengenes reference taxonomy. Detection of differentially abundant taxa was carried in LEfSe using the non-strict strategy along with a LDA cutoff of 2.0 and p-value < 0.01. Taxa were identified to be significantly differential upon fulfilling the given thresholds, whereby they were attributed to be taxonomic biomarkers for the oil contaminated site exhibiting the highest LDA score for pairwise comparisons. Bacterial clades are coloured by the habitat in which it has been identified to be differentially abundant in by LefSe. Coloring follows the legend give below.

- Arctic(A)
- China oil refineries (C)
- India oil refineries(I)
- Mangrove (M)
- Marine sediments (DWH)
- Oil sands core (OSC)
- Oil sands tailings pond deep (OSTPd)
- Oil sands tailings pond median (OSTPm)
- Oil sands tailings pond upper (OSTPu)
- Taiga bottom active layer (Tb)
- Taiga permafrost layer (Tp)
- Taiga upper active layer (Tu)















**Supplementary data. Table S3. Functional profile of oil contaminated environments expressed in terms of KEGG functional modules.** Relative abundances of KEGG modules as estimated by HUMAnN2 are described.

Differentially abundant functional modules were detected by LEfSe using the non-strict strategy with a LDA cutoff of 2.0 and p-value < 0.01. Functional modules are labeled according to the habitat exhibiting the highest LDA value for pairwise comparison among all oil polluted environments. KEGG Functional Modules are further colored according to the habitat in which they were detected to be differentially abundant in by LefSe. Coloring was according to the legend given below.

- Arctic (A)
- China oil refineries (C)
- India oil refineries (I)
- Mangrove (M)
- Marine sediments (DWH)
- Oil sands core (OSC)
- Oil sands tailings pond deep (OSTPd)
- Oil sands tailings pond median (OSTPm)
- Oil sands tailings pond upper (OSTPu)
- Taiga bottom active layer (Tb)
- Taiga permafrost layer (Tp)
- Taiga upper active layer (Tu)

| Item ID | Item Name | Metric A |     |     |     |     |     |     |     |     |     |     |     |     |     | Metric B |     |     |     |     |     |     |     |     |     |     |     |     |     | Metric C |     |     |     |     |     |     |     |     |     |     |                      |        |     | Description | Status |
|---------|-----------|----------|-----|-----|-----|-----|-----|-----|-----|-----|-----|-----|-----|-----|-----|----------|-----|-----|-----|-----|-----|-----|-----|-----|-----|-----|-----|-----|-----|----------|-----|-----|-----|-----|-----|-----|-----|-----|-----|-----|----------------------|--------|-----|-------------|--------|
|         |           | M1       | M2  | M3  | M4  | M5  | M6  | M7  | M8  | M9  | M10 | M11 | M12 | M13 | M14 | B1       | B2  | B3  | B4  | B5  | B6  | B7  | B8  | B9  | B10 | B11 | B12 | B13 | B14 | C1       | C2  | C3  | C4  | C5  | C6  | C7  | C8  | C9  | C10 | C11 | C12                  | C13    | C14 |             |        |
| 001     | Item 001  | 1.1      | 1.2 | 1.3 | 1.4 | 1.5 | 1.6 | 1.7 | 1.8 | 1.9 | 2.0 | 2.1 | 2.2 | 2.3 | 3.1 | 3.2      | 3.3 | 3.4 | 3.5 | 3.6 | 3.7 | 3.8 | 3.9 | 4.0 | 4.1 | 4.2 | 5.1 | 5.2 | 5.3 | 5.4      | 5.5 | 5.6 | 5.7 | 5.8 | 5.9 | 6.0 | 6.1 | 6.2 | 6.3 | 6.4 | Item 001 Description | Active |     |             |        |

Table S4. I





| MBA Index   | MBA Index |        |        |        |        |           |        |        |        |        | MBA Index |        |        |        |        |           |        |        |        |        | MBA Index |        |        |        |        |           |        |        |        |        | MBA Index |        |        |        |        |           |        |        |        |        | MBA Index |        |        |        |        |        |        |        |        |        | MBA Index | MBA Index |        |        |        |
|-------------|-----------|--------|--------|--------|--------|-----------|--------|--------|--------|--------|-----------|--------|--------|--------|--------|-----------|--------|--------|--------|--------|-----------|--------|--------|--------|--------|-----------|--------|--------|--------|--------|-----------|--------|--------|--------|--------|-----------|--------|--------|--------|--------|-----------|--------|--------|--------|--------|--------|--------|--------|--------|--------|-----------|-----------|--------|--------|--------|
|             | MBA Index |        |        |        |        | MBA Index |        |        |        |        | MBA Index |        |        |        |        | MBA Index |        |        |        |        | MBA Index |        |        |        |        | MBA Index |        |        |        |        | MBA Index |        |        |        |        | MBA Index |        |        |        |        |           |        |        |        |        |        |        |        |        |        |           |           |        |        |        |
|             | M         | A      | B      | C      | D      | M         | A      | B      | C      | D      | M         | A      | B      | C      | D      | M         | A      | B      | C      | D      | M         | A      | B      | C      | D      | M         | A      | B      | C      | D      | M         | A      | B      | C      | D      | M         | A      | B      | C      | D      | M         | A      | B      | C      | D      | M      | A      | B      | C      | D      |           |           |        |        |        |
| MBA Index 1 | 1.0000    | 1.0000 | 1.0000 | 1.0000 | 1.0000 | 1.0000    | 1.0000 | 1.0000 | 1.0000 | 1.0000 | 1.0000    | 1.0000 | 1.0000 | 1.0000 | 1.0000 | 1.0000    | 1.0000 | 1.0000 | 1.0000 | 1.0000 | 1.0000    | 1.0000 | 1.0000 | 1.0000 | 1.0000 | 1.0000    | 1.0000 | 1.0000 | 1.0000 | 1.0000 | 1.0000    | 1.0000 | 1.0000 | 1.0000 | 1.0000 | 1.0000    | 1.0000 | 1.0000 | 1.0000 | 1.0000 | 1.0000    | 1.0000 | 1.0000 | 1.0000 | 1.0000 | 1.0000 | 1.0000 | 1.0000 | 1.0000 | 1.0000 | 1.0000    | 1.0000    | 1.0000 | 1.0000 | 1.0000 |

Table S4. IV





**Supplementary data. Table S4. Coverage of KEGG functional modules in oil contaminated environments.**

Percentage of coverage of KEGG functional modules as estimated by HUMAnN2 is described. Presence/absence of KEGG functional was defined according to the following criteria: median of percentage coverage estimates for samples of each oil polluted habitat  $> 0.9$  represents presence;  $< 0.1$  denotes absence. Core Modules (denoted by presence in all habitats) are colored in green while Varied Modules (denoted by presence/absence in different habitats) are colored in red.

| KEGG_Metabolic | Arctic |    |    |    |    |     |     |    |    |    |    |    |    |    |    |    |    |    |    |    | Chukotka_refineres |    |    |    |    |    |    |    | Magrore |    |      |      |      |      |      |      | Marine_sediments |     |     |     |     |     |     |     | Taiga_upper_layer |     |     |     |     |     |     |     | Taiga_bottom_layer |     |     |     |     |     |     |     | Taiga_permafrost_layer |     |     |     |     |     |     |     | Oil_sands_core |     |     |     |     |     |     |     | Oil_sands_tailings_pond_upper |      |      |      |      |      |      |      | Oil_sands_tailings_pond_median |      |       |       |       |       |       |       | Oil_sands_tailings_pond_deep |       |       |       |       |       |       |       | I if median >= 90% for the samples per site; 1 if median <= 10% for the samples per site | Kind of Module Inferred (Core or Variant) |       |       |       |       |       |       |       |       |       |       |       |       |       |       |       |       |       |       |       |       |       |       |       |       |       |       |       |       |       |       |       |       |       |       |       |       |       |       |       |       |       |       |       |       |       |       |       |       |       |       |       |       |       |       |       |       |       |       |       |       |       |       |       |       |       |       |       |       |       |       |       |       |       |       |       |        |        |        |        |        |        |        |        |        |        |        |        |        |        |        |        |        |        |        |        |        |        |        |        |        |        |        |        |        |        |        |        |        |        |        |        |        |        |        |        |        |        |        |        |        |        |        |        |        |        |        |        |        |        |        |        |        |        |        |        |        |        |        |        |        |        |        |        |        |        |        |        |        |        |        |        |        |        |        |        |        |        |        |        |        |        |        |        |        |        |        |        |        |        |        |        |        |        |        |        |        |        |        |        |        |        |        |        |        |        |        |        |        |        |        |        |        |        |        |        |        |        |        |        |        |        |        |        |        |        |        |        |        |        |        |        |        |        |        |        |        |        |        |        |        |        |        |        |        |        |        |        |        |        |        |        |        |        |        |        |        |        |        |        |        |        |        |        |        |        |        |        |        |        |        |        |        |        |        |        |        |        |        |        |        |        |        |        |        |        |        |        |        |        |        |        |        |        |        |        |        |        |        |        |        |        |        |        |        |        |        |        |        |        |        |        |        |        |        |        |        |        |        |        |        |        |        |        |        |        |        |        |        |        |        |        |        |        |        |        |        |        |        |        |        |        |        |        |        |        |        |        |        |        |        |        |        |        |        |        |        |        |        |        |        |        |        |        |        |        |        |        |        |        |        |        |        |        |        |        |        |        |        |        |        |        |        |        |        |        |        |        |        |        |        |        |        |        |        |        |        |        |        |        |        |        |        |        |        |        |        |        |        |        |        |        |        |        |        |        |        |        |        |        |        |        |        |        |        |        |        |        |        |        |        |        |        |        |        |        |        |        |        |        |        |        |        |        |        |        |        |        |        |        |        |        |        |        |        |        |        |        |        |        |        |        |        |        |        |        |        |        |        |        |        |        |        |        |        |        |        |        |        |        |        |        |        |        |        |        |        |        |        |        |        |        |        |        |        |        |        |        |        |        |        |        |        |        |        |        |        |        |        |        |        |        |        |        |        |        |        |        |        |        |        |        |        |        |        |        |        |        |        |        |        |        |        |        |        |        |        |        |        |        |        |        |        |        |        |        |        |        |        |        |        |        |        |        |        |        |        |        |        |        |        |        |        |        |        |        |        |        |        |        |        |        |        |        |        |        |        |        |        |        |        |        |        |        |        |        |        |        |        |        |        |        |        |        |        |        |        |        |        |        |        |        |        |        |        |        |        |        |        |        |        |        |        |        |        |        |        |        |        |        |        |        |        |        |        |        |        |        |        |        |        |        |        |        |        |        |        |        |        |        |        |        |        |        |        |        |        |        |        |        |        |        |        |        |        |        |        |        |        |        |        |        |        |        |        |        |        |        |        |        |        |        |        |        |        |        |        |        |        |        |        |        |        |        |        |        |        |        |        |        |        |        |        |        |        |        |        |        |        |        |        |        |        |        |        |        |        |        |        |        |        |        |        |        |        |        |        |        |        |        |        |        |        |        |        |        |        |        |        |        |        |        |        |        |        |        |        |        |        |        |        |        |        |        |        |        |        |        |        |        |        |        |        |        |        |        |        |        |        |        |        |        |        |        |        |        |        |        |        |        |        |        |        |        |        |        |        |        |        |        |        |        |        |        |        |        |        |        |        |        |        |        |        |        |        |        |        |        |        |        |        |        |        |        |        |        |        |        |        |        |        |        |        |        |        |        |        |        |        |        |        |        |        |        |        |        |        |        |        |        |        |        |        |        |        |        |        |        |        |        |        |        |        |        |        |        |        |        |        |        |        |        |        |        |        |        |        |        |        |        |        |        |        |        |        |        |        |        |        |        |        |        |        |        |        |        |        |        |        |        |        |        |        |        |        |        |        |        |        |        |        |        |        |        |        |        |        |        |        |        |        |        |        |        |        |        |        |        |        |        |        |        |        |        |        |        |        |        |        |        |        |        |        |        |        |        |        |        |        |        |        |        |        |        |        |        |        |        |        |        |        |        |        |        |        |        |        |        |        |        |        |        |        |        |        |        |        |        |        |        |        |        |        |        |        |        |        |        |        |        |        |        |        |        |        |        |        |        |        |        |        |        |        |        |        |        |        |        |        |        |        |        |        |        |        |        |         |         |         |         |         |         |         |         |         |         |         |         |         |         |         |         |         |         |         |         |         |         |         |         |         |         |         |         |         |         |         |         |         |         |         |         |         |         |         |         |         |         |         |         |         |         |         |         |         |         |         |         |         |         |         |         |         |         |         |         |         |         |         |         |         |         |         |         |         |         |         |         |         |         |         |         |         |         |         |         |         |         |         |         |         |         |         |         |         |         |         |         |         |         |         |         |         |         |         |         |         |         |         |         |         |         |         |         |         |         |         |         |         |         |         |         |         |         |         |         |         |         |         |         |         |         |         |         |         |         |         |         |         |         |         |         |         |         |         |         |         |         |         |         |         |         |         |         |         |         |         |         |         |         |           |
|----------------|--------|----|----|----|----|-----|-----|----|----|----|----|----|----|----|----|----|----|----|----|----|--------------------|----|----|----|----|----|----|----|---------|----|------|------|------|------|------|------|------------------|-----|-----|-----|-----|-----|-----|-----|-------------------|-----|-----|-----|-----|-----|-----|-----|--------------------|-----|-----|-----|-----|-----|-----|-----|------------------------|-----|-----|-----|-----|-----|-----|-----|----------------|-----|-----|-----|-----|-----|-----|-----|-------------------------------|------|------|------|------|------|------|------|--------------------------------|------|-------|-------|-------|-------|-------|-------|------------------------------|-------|-------|-------|-------|-------|-------|-------|------------------------------------------------------------------------------------------|-------------------------------------------|-------|-------|-------|-------|-------|-------|-------|-------|-------|-------|-------|-------|-------|-------|-------|-------|-------|-------|-------|-------|-------|-------|-------|-------|-------|-------|-------|-------|-------|-------|-------|-------|-------|-------|-------|-------|-------|-------|-------|-------|-------|-------|-------|-------|-------|-------|-------|-------|-------|-------|-------|-------|-------|-------|-------|-------|-------|-------|-------|-------|-------|-------|-------|-------|-------|-------|-------|-------|-------|-------|-------|-------|-------|-------|-------|--------|--------|--------|--------|--------|--------|--------|--------|--------|--------|--------|--------|--------|--------|--------|--------|--------|--------|--------|--------|--------|--------|--------|--------|--------|--------|--------|--------|--------|--------|--------|--------|--------|--------|--------|--------|--------|--------|--------|--------|--------|--------|--------|--------|--------|--------|--------|--------|--------|--------|--------|--------|--------|--------|--------|--------|--------|--------|--------|--------|--------|--------|--------|--------|--------|--------|--------|--------|--------|--------|--------|--------|--------|--------|--------|--------|--------|--------|--------|--------|--------|--------|--------|--------|--------|--------|--------|--------|--------|--------|--------|--------|--------|--------|--------|--------|--------|--------|--------|--------|--------|--------|--------|--------|--------|--------|--------|--------|--------|--------|--------|--------|--------|--------|--------|--------|--------|--------|--------|--------|--------|--------|--------|--------|--------|--------|--------|--------|--------|--------|--------|--------|--------|--------|--------|--------|--------|--------|--------|--------|--------|--------|--------|--------|--------|--------|--------|--------|--------|--------|--------|--------|--------|--------|--------|--------|--------|--------|--------|--------|--------|--------|--------|--------|--------|--------|--------|--------|--------|--------|--------|--------|--------|--------|--------|--------|--------|--------|--------|--------|--------|--------|--------|--------|--------|--------|--------|--------|--------|--------|--------|--------|--------|--------|--------|--------|--------|--------|--------|--------|--------|--------|--------|--------|--------|--------|--------|--------|--------|--------|--------|--------|--------|--------|--------|--------|--------|--------|--------|--------|--------|--------|--------|--------|--------|--------|--------|--------|--------|--------|--------|--------|--------|--------|--------|--------|--------|--------|--------|--------|--------|--------|--------|--------|--------|--------|--------|--------|--------|--------|--------|--------|--------|--------|--------|--------|--------|--------|--------|--------|--------|--------|--------|--------|--------|--------|--------|--------|--------|--------|--------|--------|--------|--------|--------|--------|--------|--------|--------|--------|--------|--------|--------|--------|--------|--------|--------|--------|--------|--------|--------|--------|--------|--------|--------|--------|--------|--------|--------|--------|--------|--------|--------|--------|--------|--------|--------|--------|--------|--------|--------|--------|--------|--------|--------|--------|--------|--------|--------|--------|--------|--------|--------|--------|--------|--------|--------|--------|--------|--------|--------|--------|--------|--------|--------|--------|--------|--------|--------|--------|--------|--------|--------|--------|--------|--------|--------|--------|--------|--------|--------|--------|--------|--------|--------|--------|--------|--------|--------|--------|--------|--------|--------|--------|--------|--------|--------|--------|--------|--------|--------|--------|--------|--------|--------|--------|--------|--------|--------|--------|--------|--------|--------|--------|--------|--------|--------|--------|--------|--------|--------|--------|--------|--------|--------|--------|--------|--------|--------|--------|--------|--------|--------|--------|--------|--------|--------|--------|--------|--------|--------|--------|--------|--------|--------|--------|--------|--------|--------|--------|--------|--------|--------|--------|--------|--------|--------|--------|--------|--------|--------|--------|--------|--------|--------|--------|--------|--------|--------|--------|--------|--------|--------|--------|--------|--------|--------|--------|--------|--------|--------|--------|--------|--------|--------|--------|--------|--------|--------|--------|--------|--------|--------|--------|--------|--------|--------|--------|--------|--------|--------|--------|--------|--------|--------|--------|--------|--------|--------|--------|--------|--------|--------|--------|--------|--------|--------|--------|--------|--------|--------|--------|--------|--------|--------|--------|--------|--------|--------|--------|--------|--------|--------|--------|--------|--------|--------|--------|--------|--------|--------|--------|--------|--------|--------|--------|--------|--------|--------|--------|--------|--------|--------|--------|--------|--------|--------|--------|--------|--------|--------|--------|--------|--------|--------|--------|--------|--------|--------|--------|--------|--------|--------|--------|--------|--------|--------|--------|--------|--------|--------|--------|--------|--------|--------|--------|--------|--------|--------|--------|--------|--------|--------|--------|--------|--------|--------|--------|--------|--------|--------|--------|--------|--------|--------|--------|--------|--------|--------|--------|--------|--------|--------|--------|--------|--------|--------|--------|--------|--------|--------|--------|--------|--------|--------|--------|--------|--------|--------|--------|--------|--------|--------|--------|--------|--------|--------|--------|--------|--------|--------|--------|--------|--------|--------|--------|--------|--------|--------|--------|--------|--------|--------|--------|--------|--------|--------|--------|--------|--------|--------|--------|--------|--------|--------|--------|--------|--------|--------|--------|--------|--------|--------|--------|--------|--------|--------|--------|--------|--------|--------|--------|--------|--------|--------|--------|--------|--------|--------|--------|--------|--------|--------|--------|--------|--------|--------|--------|--------|--------|--------|--------|--------|--------|--------|--------|--------|--------|--------|--------|--------|--------|--------|--------|--------|--------|--------|--------|--------|--------|--------|--------|--------|--------|--------|--------|--------|--------|--------|--------|--------|--------|--------|--------|--------|--------|--------|--------|--------|--------|--------|--------|--------|--------|--------|--------|--------|--------|--------|--------|--------|--------|--------|--------|--------|--------|--------|--------|--------|--------|--------|--------|--------|--------|--------|--------|--------|--------|--------|--------|--------|--------|--------|--------|--------|--------|--------|--------|--------|--------|--------|--------|--------|--------|--------|--------|--------|--------|--------|--------|--------|--------|--------|--------|--------|--------|--------|--------|--------|--------|--------|--------|--------|--------|--------|--------|--------|--------|--------|--------|--------|--------|--------|--------|--------|--------|--------|--------|--------|--------|--------|--------|--------|--------|--------|--------|--------|--------|--------|--------|--------|--------|--------|--------|--------|--------|--------|--------|--------|--------|--------|--------|--------|--------|--------|--------|--------|--------|--------|--------|--------|--------|--------|--------|--------|--------|--------|--------|--------|--------|--------|--------|--------|--------|--------|--------|--------|--------|--------|--------|--------|--------|--------|--------|--------|--------|--------|--------|--------|--------|--------|--------|--------|--------|--------|--------|--------|--------|--------|--------|--------|--------|--------|--------|--------|--------|--------|--------|--------|--------|--------|--------|--------|--------|--------|--------|--------|--------|--------|--------|--------|--------|--------|--------|--------|--------|--------|--------|--------|--------|--------|--------|--------|--------|--------|--------|--------|--------|--------|--------|---------|---------|---------|---------|---------|---------|---------|---------|---------|---------|---------|---------|---------|---------|---------|---------|---------|---------|---------|---------|---------|---------|---------|---------|---------|---------|---------|---------|---------|---------|---------|---------|---------|---------|---------|---------|---------|---------|---------|---------|---------|---------|---------|---------|---------|---------|---------|---------|---------|---------|---------|---------|---------|---------|---------|---------|---------|---------|---------|---------|---------|---------|---------|---------|---------|---------|---------|---------|---------|---------|---------|---------|---------|---------|---------|---------|---------|---------|---------|---------|---------|---------|---------|---------|---------|---------|---------|---------|---------|---------|---------|---------|---------|---------|---------|---------|---------|---------|---------|---------|---------|---------|---------|---------|---------|---------|---------|---------|---------|---------|---------|---------|---------|---------|---------|---------|---------|---------|---------|---------|---------|---------|---------|---------|---------|---------|---------|---------|---------|---------|---------|---------|---------|---------|---------|---------|---------|---------|---------|---------|---------|---------|---------|---------|---------|---------|---------|---------|---------|---------|---------|---------|---------|---------|-----------|
|                | I1     | I2 | I3 | I4 | A1 | A10 | A11 | A2 | A2 | A3 | A4 | A5 | A6 | A7 | A7 | A8 | A9 | A9 | C1 | C2 | C3                 | C4 | C5 | C6 | C7 | C8 | C9 | M1 | M2      | M3 | D1H1 | D1H2 | D1H3 | D1H4 | D1H5 | D1H6 | D1H7             | T1a | T1a | T1a | T1a | T1b | T1b | T1b | T1b               | T1c | T1c | T1c | T1c | T1d | T1d | T1d | T1d                | T1e | T1e | T1e | T1e | T1f | T1f | T1f | T1f                    | T1g | T1g | T1g | T1g | T1h | T1h | T1h | T1h            | T1i | T1i | T1i | T1i | T1j | T1j | T1j | T1j                           | O1C1 | O1C2 | O1C3 | O1C4 | O1C5 | O1C6 | O1C7 | O1C8                           | O1C9 | O1C10 | O1C11 | O1C12 | O1C13 | O1C14 | O1C15 | O1C16                        | O1C17 | O1C18 | O1C19 | O1C20 | O1C21 | O1C22 | O1C23 | O1C24                                                                                    |                                           | O1C25 | O1C26 | O1C27 | O1C28 | O1C29 | O1C30 | O1C31 | O1C32 | O1C33 | O1C34 | O1C35 | O1C36 | O1C37 | O1C38 | O1C39 | O1C40 | O1C41 | O1C42 | O1C43 | O1C44 | O1C45 | O1C46 | O1C47 | O1C48 | O1C49 | O1C50 | O1C51 | O1C52 | O1C53 | O1C54 | O1C55 | O1C56 | O1C57 | O1C58 | O1C59 | O1C60 | O1C61 | O1C62 | O1C63 | O1C64 | O1C65 | O1C66 | O1C67 | O1C68 | O1C69 | O1C70 | O1C71 | O1C72 | O1C73 | O1C74 | O1C75 | O1C76 | O1C77 | O1C78 | O1C79 | O1C80 | O1C81 | O1C82 | O1C83 | O1C84 | O1C85 | O1C86 | O1C87 | O1C88 | O1C89 | O1C90 | O1C91 | O1C92 | O1C93 | O1C94 | O1C95 | O1C96 | O1C97 | O1C98 | O1C99 | O1C100 | O1C101 | O1C102 | O1C103 | O1C104 | O1C105 | O1C106 | O1C107 | O1C108 | O1C109 | O1C110 | O1C111 | O1C112 | O1C113 | O1C114 | O1C115 | O1C116 | O1C117 | O1C118 | O1C119 | O1C120 | O1C121 | O1C122 | O1C123 | O1C124 | O1C125 | O1C126 | O1C127 | O1C128 | O1C129 | O1C130 | O1C131 | O1C132 | O1C133 | O1C134 | O1C135 | O1C136 | O1C137 | O1C138 | O1C139 | O1C140 | O1C141 | O1C142 | O1C143 | O1C144 | O1C145 | O1C146 | O1C147 | O1C148 | O1C149 | O1C150 | O1C151 | O1C152 | O1C153 | O1C154 | O1C155 | O1C156 | O1C157 | O1C158 | O1C159 | O1C160 | O1C161 | O1C162 | O1C163 | O1C164 | O1C165 | O1C166 | O1C167 | O1C168 | O1C169 | O1C170 | O1C171 | O1C172 | O1C173 | O1C174 | O1C175 | O1C176 | O1C177 | O1C178 | O1C179 | O1C180 | O1C181 | O1C182 | O1C183 | O1C184 | O1C185 | O1C186 | O1C187 | O1C188 | O1C189 | O1C190 | O1C191 | O1C192 | O1C193 | O1C194 | O1C195 | O1C196 | O1C197 | O1C198 | O1C199 | O1C200 | O1C201 | O1C202 | O1C203 | O1C204 | O1C205 | O1C206 | O1C207 | O1C208 | O1C209 | O1C210 | O1C211 | O1C212 | O1C213 | O1C214 | O1C215 | O1C216 | O1C217 | O1C218 | O1C219 | O1C220 | O1C221 | O1C222 | O1C223 | O1C224 | O1C225 | O1C226 | O1C227 | O1C228 | O1C229 | O1C230 | O1C231 | O1C232 | O1C233 | O1C234 | O1C235 | O1C236 | O1C237 | O1C238 | O1C239 | O1C240 | O1C241 | O1C242 | O1C243 | O1C244 | O1C245 | O1C246 | O1C247 | O1C248 | O1C249 | O1C250 | O1C251 | O1C252 | O1C253 | O1C254 | O1C255 | O1C256 | O1C257 | O1C258 | O1C259 | O1C260 | O1C261 | O1C262 | O1C263 | O1C264 | O1C265 | O1C266 | O1C267 | O1C268 | O1C269 | O1C270 | O1C271 | O1C272 | O1C273 | O1C274 | O1C275 | O1C276 | O1C277 | O1C278 | O1C279 | O1C280 | O1C281 | O1C282 | O1C283 | O1C284 | O1C285 | O1C286 | O1C287 | O1C288 | O1C289 | O1C290 | O1C291 | O1C292 | O1C293 | O1C294 | O1C295 | O1C296 | O1C297 | O1C298 | O1C299 | O1C300 | O1C301 | O1C302 | O1C303 | O1C304 | O1C305 | O1C306 | O1C307 | O1C308 | O1C309 | O1C310 | O1C311 | O1C312 | O1C313 | O1C314 | O1C315 | O1C316 | O1C317 | O1C318 | O1C319 | O1C320 | O1C321 | O1C322 | O1C323 | O1C324 | O1C325 | O1C326 | O1C327 | O1C328 | O1C329 | O1C330 | O1C331 | O1C332 | O1C333 | O1C334 | O1C335 | O1C336 | O1C337 | O1C338 | O1C339 | O1C340 | O1C341 | O1C342 | O1C343 | O1C344 | O1C345 | O1C346 | O1C347 | O1C348 | O1C349 | O1C350 | O1C351 | O1C352 | O1C353 | O1C354 | O1C355 | O1C356 | O1C357 | O1C358 | O1C359 | O1C360 | O1C361 | O1C362 | O1C363 | O1C364 | O1C365 | O1C366 | O1C367 | O1C368 | O1C369 | O1C370 | O1C371 | O1C372 | O1C373 | O1C374 | O1C375 | O1C376 | O1C377 | O1C378 | O1C379 | O1C380 | O1C381 | O1C382 | O1C383 | O1C384 | O1C385 | O1C386 | O1C387 | O1C388 | O1C389 | O1C390 | O1C391 | O1C392 | O1C393 | O1C394 | O1C395 | O1C396 | O1C397 | O1C398 | O1C399 | O1C400 | O1C401 | O1C402 | O1C403 | O1C404 | O1C405 | O1C406 | O1C407 | O1C408 | O1C409 | O1C410 | O1C411 | O1C412 | O1C413 | O1C414 | O1C415 | O1C416 | O1C417 | O1C418 | O1C419 | O1C420 | O1C421 | O1C422 | O1C423 | O1C424 | O1C425 | O1C426 | O1C427 | O1C428 | O1C429 | O1C430 | O1C431 | O1C432 | O1C433 | O1C434 | O1C435 | O1C436 | O1C437 | O1C438 | O1C439 | O1C440 | O1C441 | O1C442 | O1C443 | O1C444 | O1C445 | O1C446 | O1C447 | O1C448 | O1C449 | O1C450 | O1C451 | O1C452 | O1C453 | O1C454 | O1C455 | O1C456 | O1C457 | O1C458 | O1C459 | O1C460 | O1C461 | O1C462 | O1C463 | O1C464 | O1C465 | O1C466 | O1C467 | O1C468 | O1C469 | O1C470 | O1C471 | O1C472 | O1C473 | O1C474 | O1C475 | O1C476 | O1C477 | O1C478 | O1C479 | O1C480 | O1C481 | O1C482 | O1C483 | O1C484 | O1C485 | O1C486 | O1C487 | O1C488 | O1C489 | O1C490 | O1C491 | O1C492 | O1C493 | O1C494 | O1C495 | O1C496 | O1C497 | O1C498 | O1C499 | O1C500 | O1C501 | O1C502 | O1C503 | O1C504 | O1C505 | O1C506 | O1C507 | O1C508 | O1C509 | O1C510 | O1C511 | O1C512 | O1C513 | O1C514 | O1C515 | O1C516 | O1C517 | O1C518 | O1C519 | O1C520 | O1C521 | O1C522 | O1C523 | O1C524 | O1C525 | O1C526 | O1C527 | O1C528 | O1C529 | O1C530 | O1C531 | O1C532 | O1C533 | O1C534 | O1C535 | O1C536 | O1C537 | O1C538 | O1C539 | O1C540 | O1C541 | O1C542 | O1C543 | O1C544 | O1C545 | O1C546 | O1C547 | O1C548 | O1C549 | O1C550 | O1C551 | O1C552 | O1C553 | O1C554 | O1C555 | O1C556 | O1C557 | O1C558 | O1C559 | O1C560 | O1C561 | O1C562 | O1C563 | O1C564 | O1C565 | O1C566 | O1C567 | O1C568 | O1C569 | O1C570 | O1C571 | O1C572 | O1C573 | O1C574 | O1C575 | O1C576 | O1C577 | O1C578 | O1C579 | O1C580 | O1C581 | O1C582 | O1C583 | O1C584 | O1C585 | O1C586 | O1C587 | O1C588 | O1C589 | O1C590 | O1C591 | O1C592 | O1C593 | O1C594 | O1C595 | O1C596 | O1C597 | O1C598 | O1C599 | O1C600 | O1C601 | O1C602 | O1C603 | O1C604 | O1C605 | O1C606 | O1C607 | O1C608 | O1C609 | O1C610 | O1C611 | O1C612 | O1C613 | O1C614 | O1C615 | O1C616 | O1C617 | O1C618 | O1C619 | O1C620 | O1C621 | O1C622 | O1C623 | O1C624 | O1C625 | O1C626 | O1C627 | O1C628 | O1C629 | O1C630 | O1C631 | O1C632 | O1C633 | O1C634 | O1C635 | O1C636 | O1C637 | O1C638 | O1C639 | O1C640 | O1C641 | O1C642 | O1C643 | O1C644 | O1C645 | O1C646 | O1C647 | O1C648 | O1C649 | O1C650 | O1C651 | O1C652 | O1C653 | O1C654 | O1C655 | O1C656 | O1C657 | O1C658 | O1C659 | O1C660 | O1C661 | O1C662 | O1C663 | O1C664 | O1C665 | O1C666 | O1C667 | O1C668 | O1C669 | O1C670 | O1C671 | O1C672 | O1C673 | O1C674 | O1C675 | O1C676 | O1C677 | O1C678 | O1C679 | O1C680 | O1C681 | O1C682 | O1C683 | O1C684 | O1C685 | O1C686 | O1C687 | O1C688 | O1C689 | O1C690 | O1C691 | O1C692 | O1C693 | O1C694 | O1C695 | O1C696 | O1C697 | O1C698 | O1C699 | O1C700 | O1C701 | O1C702 | O1C703 | O1C704 | O1C705 | O1C706 | O1C707 | O1C708 | O1C709 | O1C710 | O1C711 | O1C712 | O1C713 | O1C714 | O1C715 | O1C716 | O1C717 | O1C718 | O1C719 | O1C720 | O1C721 | O1C722 | O1C723 | O1C724 | O1C725 | O1C726 | O1C727 | O1C728 | O1C729 | O1C730 | O1C731 | O1C732 | O1C733 | O1C734 | O1C735 | O1C736 | O1C737 | O1C738 | O1C739 | O1C740 | O1C741 | O1C742 | O1C743 | O1C744 | O1C745 | O1C746 | O1C747 | O1C748 | O1C749 | O1C750 | O1C751 | O1C752 | O1C753 | O1C754 | O1C755 | O1C756 | O1C757 | O1C758 | O1C759 | O1C760 | O1C761 | O1C762 | O1C763 | O1C764 | O1C765 | O1C766 | O1C767 | O1C768 | O1C769 | O1C770 | O1C771 | O1C772 | O1C773 | O1C774 | O1C775 | O1C776 | O1C777 | O1C778 | O1C779 | O1C780 | O1C781 | O1C782 | O1C783 | O1C784 | O1C785 | O1C786 | O1C787 | O1C788 | O1C789 | O1C790 | O1C791 | O1C792 | O1C793 | O1C794 | O1C795 | O1C796 | O1C797 | O1C798 | O1C799 | O1C800 | O1C801 | O1C802 | O1C803 | O1C804 | O1C805 | O1C806 | O1C807 | O1C808 | O1C809 | O1C810 | O1C811 | O1C812 | O1C813 | O1C814 | O1C815 | O1C816 | O1C817 | O1C818 | O1C819 | O1C820 | O1C821 | O1C822 | O1C823 | O1C824 | O1C825 | O1C826 | O1C827 | O1C828 | O1C829 | O1C830 | O1C831 | O1C832 | O1C833 | O1C834 | O1C835 | O1C836 | O1C837 | O1C838 | O1C839 | O1C840 | O1C841 | O1C842 | O1C843 | O1C844 | O1C845 | O1C846 | O1C847 | O1C848 | O1C849 | O1C850 | O1C851 | O1C852 | O1C853 | O1C854 | O1C855 | O1C856 | O1C857 | O1C858 | O1C859 | O1C860 | O1C861 | O1C862 | O1C863 | O1C864 | O1C865 | O1C866 | O1C867 | O1C868 | O1C869 | O1C870 | O1C871 | O1C872 | O1C873 | O1C874 | O1C875 | O1C876 | O1C877 | O1C878 | O1C879 | O1C880 | O1C881 | O1C882 | O1C883 | O1C884 | O1C885 | O1C886 | O1C887 | O1C888 | O1C889 | O1C890 | O1C891 | O1C892 | O1C893 | O1C894 | O1C895 | O1C896 | O1C897 | O1C898 | O1C899 | O1C900 | O1C901 | O1C902 | O1C903 | O1C904 | O1C905 | O1C906 | O1C907 | O1C908 | O1C909 | O1C910 | O1C911 | O1C912 | O1C913 | O1C914 | O1C915 | O1C916 | O1C917 | O1C918 | O1C919 | O1C920 | O1C921 | O1C922 | O1C923 | O1C924 | O1C925 | O1C926 | O1C927 | O1C928 | O1C929 | O1C930 | O1C931 | O1C932 | O1C933 | O1C934 | O1C935 | O1C936 | O1C937 | O1C938 | O1C939 | O1C940 | O1C941 | O1C942 | O1C943 | O1C944 | O1C945 | O1C946 | O1C947 | O1C948 | O1C949 | O1C950 | O1C951 | O1C952 | O1C953 | O1C954 | O1C955 | O1C956 | O1C957 | O1C958 | O1C959 | O1C960 | O1C961 | O1C962 | O1C963 | O1C964 | O1C965 | O1C966 | O1C967 | O1C968 | O1C969 | O1C970 | O1C971 | O1C972 | O1C973 | O1C974 | O1C975 | O1C976 | O1C977 | O1C978 | O1C979 | O1C980 | O1C981 | O1C982 | O1C983 | O1C984 | O1C985 | O1C986 | O1C987 | O1C988 | O1C989 | O1C990 | O1C991 | O1C992 | O1C993 | O1C994 | O1C995 | O1C996 | O1C997 | O1C998 | O1C999 | O1C1000 | O1C1001 | O1C1002 | O1C1003 | O1C1004 | O1C1005 | O1C1006 | O1C1007 | O1C1008 | O1C1009 | O1C1010 | O1C1011 | O1C1012 | O1C1013 | O1C1014 | O1C1015 | O1C1016 | O1C1017 | O1C1018 | O1C1019 | O1C1020 | O1C1021 | O1C1022 | O1C1023 | O1C1024 | O1C1025 | O1C1026 | O1C1027 | O1C1028 | O1C1029 | O1C1030 | O1C1031 | O1C1032 | O1C1033 | O1C1034 | O1C1035 | O1C1036 | O1C1037 | O1C1038 | O1C1039 | O1C1040 | O1C1041 | O1C1042 | O1C1043 | O1C1044 | O1C1045 | O1C1046 | O1C1047 | O1C1048 | O1C1049 | O1C1050 | O1C1051 | O1C1052 | O1C1053 | O1C1054 | O1C1055 | O1C1056 | O1C1057 | O1C1058 | O1C1059 | O1C1060 | O1C1061 | O1C1062 | O1C1063 | O1C1064 | O1C1065 | O1C1066 | O1C1067 | O1C1068 | O1C1069 | O1C1070 | O1C1071 | O1C1072 | O1C1073 | O1C1074 | O1C1075 | O1C1076 | O1C1077 | O1C1078 | O1C1079 | O1C1080 | O1C1081 | O1C1082 | O1C1083 | O1C1084 | O1C1085 | O1C1086 | O1C1087 | O1C1088 | O1C1089 | O1C1090 | O1C1091 | O1C1092 | O1C1093 | O1C1094 | O1C1095 | O1C1096 | O1C1097 | O1C1098 | O1C1099 | O1C1100 | O1C1101 | O1C1102 | O1C1103 | O1C1104 | O1C1105 | O1C1106 | O1C1107 | O1C1108 | O1C1109 | O1C1110 | O1C1111 | O1C1112 | O1C1113 | O1C1114 | O1C1115 | O1C1116 | O1C1117 | O1C1118 | O1C1119 | O1C1120 | O1C1121 | O1C1122 | O1C1123 | O1C1124 | O1C1125 | O1C1126 | O1C1127 | O1C1128 | O1C1129 | O1C1130 | O1C1131 | O1C1132 | O1C1133 | O1C1134 | O1C1135 | O1C1136 | O1C1137 | O1C1138 | O1C1139 | O1C1140 | O1C1141 | O1C1142 | O1C1143 | O1C1144 | O1C1145 | O1C1146 | O1C1147 | O1C1148 | O1C1149 | O1C1150 | O1C1151 | O1C1152 | O1C1153 | O1C1154</ |





| KEGG_Module | Arctic |    |    |    |    |     |     |     |    |    |    |    |    |    |    |    |    |    |    | China_ol_refineries |    |    |    |    |    |    |    |    |    |    |    |      |      |      |      |      |      |      | Mangrove |     |     |     |     |     |     |     |     |      | Marine_sediments |      |      |      |      |      |      |      |      |      | Tampa_upper_active_layer |     |     |     |     |     |     |     |     |      |      |      | Tampa_bottom_active_layer |      |      |      | Tampa_permafrost_layer |      |      |      |      |      |      |      | Oil_sands_core |      |      |      |      |      |      |      | Oil_sands_tailings_pond_upper |      |      |      | Oil_sands_tailings_pond_upper_n |      |      |      | Oil_sands_tailings_pond_deep |      |      |      | 1 if median >= 90% for the samples per site; -1 if median <= 10% for the samples per site |      |      |      |      |      |      |      |      |      |      |      |      |      | Kind of Module (related Zone or Y-axis) |      |      |      |      |      |      |      |      |      |      |      |      |      |      |      |      |      |      |      |      |      |      |      |      |      |      |      |      |      |      |      |      |      |      |      |      |      |      |      |      |      |       |       |       |       |       |       |       |       |       |       |       |       |       |       |       |       |       |       |       |       |       |       |       |       |       |       |       |       |       |       |       |       |       |       |       |       |       |       |       |       |       |       |       |       |       |       |       |       |       |       |       |       |       |       |       |       |       |       |       |       |       |       |       |       |       |       |       |       |       |       |       |       |       |       |       |       |       |       |       |       |       |       |       |       |       |       |       |       |       |       |       |       |       |       |       |       |       |       |       |       |       |       |       |       |       |       |       |       |       |       |       |       |       |       |       |       |       |       |       |       |       |       |       |       |       |       |       |       |       |       |       |       |       |       |       |       |       |       |       |       |       |       |       |       |       |       |       |       |       |       |       |       |       |       |       |       |       |       |       |       |       |       |       |       |       |       |       |       |       |       |       |       |       |       |       |       |       |       |       |       |       |       |       |       |       |       |       |       |       |       |       |       |       |       |       |       |       |       |       |       |       |       |       |       |       |       |       |       |       |       |       |       |       |       |       |       |       |       |       |       |       |       |       |       |       |       |       |       |       |       |       |       |       |       |       |       |       |       |       |       |       |       |       |       |       |       |       |       |       |       |       |       |       |       |       |       |       |       |       |       |       |       |       |       |       |       |       |       |       |       |       |       |       |       |       |       |       |       |       |       |       |       |       |       |       |       |       |       |       |       |       |       |       |       |       |       |       |       |       |       |       |       |       |       |       |       |       |       |       |       |       |       |       |       |       |       |       |       |       |       |       |       |       |       |       |       |       |       |       |       |       |       |       |       |       |       |       |       |       |       |       |       |       |       |       |       |       |       |       |       |       |       |       |       |       |       |       |       |       |       |       |       |       |       |       |       |       |       |       |       |       |       |       |       |       |       |       |       |       |       |       |       |       |       |       |       |       |       |       |       |       |       |       |       |       |       |       |       |       |       |       |       |       |       |       |       |       |       |       |       |       |       |       |       |       |       |       |       |       |       |       |       |       |       |       |       |       |       |       |       |       |       |       |       |       |       |       |       |       |       |       |       |       |       |       |       |       |       |       |       |       |       |       |       |       |       |       |       |       |       |       |       |       |       |       |       |       |       |       |       |       |       |       |       |       |       |       |       |       |       |       |       |       |       |       |       |       |       |       |       |       |       |       |       |       |       |       |       |       |       |       |       |       |       |       |       |       |       |       |       |       |       |       |       |       |       |       |       |       |       |       |       |       |       |       |       |       |       |       |       |       |       |       |       |       |       |       |       |       |       |       |       |       |       |       |       |       |       |       |       |       |       |       |       |       |       |       |       |       |       |       |       |       |       |       |       |       |       |       |       |       |       |       |       |       |       |       |       |       |       |       |       |       |       |       |       |       |       |       |       |       |       |       |       |       |       |       |       |       |       |       |       |       |       |       |       |       |       |       |       |       |       |       |       |       |       |       |       |       |       |       |       |       |       |       |       |       |       |       |       |       |       |       |       |       |       |       |       |       |       |       |       |       |       |       |       |       |       |       |       |       |       |       |       |       |       |       |       |       |       |       |       |       |       |       |       |       |       |       |       |       |       |       |       |       |       |       |       |       |       |       |       |       |       |       |       |       |       |       |       |       |       |       |       |       |       |       |       |       |       |       |       |       |       |       |       |       |       |       |       |       |       |       |       |       |       |       |       |       |       |       |       |       |       |       |       |       |       |       |       |       |       |       |       |       |       |       |       |       |       |       |       |       |       |       |       |       |       |       |       |       |       |       |       |       |       |       |       |       |       |       |       |       |       |       |       |       |       |       |       |       |       |       |       |       |       |       |       |       |       |       |       |       |       |       |       |       |       |       |       |       |       |       |       |       |       |       |       |       |       |       |       |       |       |       |       |       |       |       |       |       |       |       |       |       |       |       |       |       |       |       |       |       |       |       |       |       |       |       |       |       |       |       |       |       |       |       |       |       |       |       |       |       |       |       |       |       |       |       |       |       |       |       |       |       |       |       |       |       |       |       |       |       |       |       |       |       |       |       |       |       |       |       |       |       |       |       |       |       |       |       |       |       |       |       |       |       |       |       |       |       |       |       |       |       |       |       |       |       |       |        |        |        |        |        |        |        |        |        |        |        |        |        |        |        |        |        |        |        |        |        |        |        |        |        |        |        |        |        |        |        |        |        |        |        |        |        |        |        |        |        |        |        |        |        |        |        |        |        |        |        |        |        |        |        |        |        |        |        |        |        |        |        |        |        |        |        |        |        |        |        |        |        |        |        |        |        |        |        |        |        |        |        |        |        |        |        |        |        |        |        |        |        |        |        |        |        |        |        |        |        |        |        |        |        |        |        |        |        |        |        |        |        |        |        |        |        |        |        |        |        |        |        |        |        |        |        |        |        |        |        |        |        |        |        |        |        |        |        |        |        |        |        |        |        |        |        |        |        |        |        |        |        |        |        |        |        |        |        |        |        |        |        |        |        |        |        |        |        |        |        |        |        |        |        |        |        |        |        |        |        |        |        |        |        |        |        |        |        |        |        |        |        |        |        |        |        |        |        |        |        |        |        |        |        |        |        |        |        |        |        |        |        |        |        |        |        |        |        |        |        |        |        |        |        |        |        |        |        |        |        |        |        |        |        |        |        |        |        |        |        |        |        |        |        |        |        |        |        |        |        |        |        |        |        |        |        |        |        |        |        |        |        |        |        |        |        |        |        |        |        |        |        |        |        |        |        |        |        |        |        |
|-------------|--------|----|----|----|----|-----|-----|-----|----|----|----|----|----|----|----|----|----|----|----|---------------------|----|----|----|----|----|----|----|----|----|----|----|------|------|------|------|------|------|------|----------|-----|-----|-----|-----|-----|-----|-----|-----|------|------------------|------|------|------|------|------|------|------|------|------|--------------------------|-----|-----|-----|-----|-----|-----|-----|-----|------|------|------|---------------------------|------|------|------|------------------------|------|------|------|------|------|------|------|----------------|------|------|------|------|------|------|------|-------------------------------|------|------|------|---------------------------------|------|------|------|------------------------------|------|------|------|-------------------------------------------------------------------------------------------|------|------|------|------|------|------|------|------|------|------|------|------|------|-----------------------------------------|------|------|------|------|------|------|------|------|------|------|------|------|------|------|------|------|------|------|------|------|------|------|------|------|------|------|------|------|------|------|------|------|------|------|------|------|------|------|------|------|------|-------|-------|-------|-------|-------|-------|-------|-------|-------|-------|-------|-------|-------|-------|-------|-------|-------|-------|-------|-------|-------|-------|-------|-------|-------|-------|-------|-------|-------|-------|-------|-------|-------|-------|-------|-------|-------|-------|-------|-------|-------|-------|-------|-------|-------|-------|-------|-------|-------|-------|-------|-------|-------|-------|-------|-------|-------|-------|-------|-------|-------|-------|-------|-------|-------|-------|-------|-------|-------|-------|-------|-------|-------|-------|-------|-------|-------|-------|-------|-------|-------|-------|-------|-------|-------|-------|-------|-------|-------|-------|-------|-------|-------|-------|-------|-------|-------|-------|-------|-------|-------|-------|-------|-------|-------|-------|-------|-------|-------|-------|-------|-------|-------|-------|-------|-------|-------|-------|-------|-------|-------|-------|-------|-------|-------|-------|-------|-------|-------|-------|-------|-------|-------|-------|-------|-------|-------|-------|-------|-------|-------|-------|-------|-------|-------|-------|-------|-------|-------|-------|-------|-------|-------|-------|-------|-------|-------|-------|-------|-------|-------|-------|-------|-------|-------|-------|-------|-------|-------|-------|-------|-------|-------|-------|-------|-------|-------|-------|-------|-------|-------|-------|-------|-------|-------|-------|-------|-------|-------|-------|-------|-------|-------|-------|-------|-------|-------|-------|-------|-------|-------|-------|-------|-------|-------|-------|-------|-------|-------|-------|-------|-------|-------|-------|-------|-------|-------|-------|-------|-------|-------|-------|-------|-------|-------|-------|-------|-------|-------|-------|-------|-------|-------|-------|-------|-------|-------|-------|-------|-------|-------|-------|-------|-------|-------|-------|-------|-------|-------|-------|-------|-------|-------|-------|-------|-------|-------|-------|-------|-------|-------|-------|-------|-------|-------|-------|-------|-------|-------|-------|-------|-------|-------|-------|-------|-------|-------|-------|-------|-------|-------|-------|-------|-------|-------|-------|-------|-------|-------|-------|-------|-------|-------|-------|-------|-------|-------|-------|-------|-------|-------|-------|-------|-------|-------|-------|-------|-------|-------|-------|-------|-------|-------|-------|-------|-------|-------|-------|-------|-------|-------|-------|-------|-------|-------|-------|-------|-------|-------|-------|-------|-------|-------|-------|-------|-------|-------|-------|-------|-------|-------|-------|-------|-------|-------|-------|-------|-------|-------|-------|-------|-------|-------|-------|-------|-------|-------|-------|-------|-------|-------|-------|-------|-------|-------|-------|-------|-------|-------|-------|-------|-------|-------|-------|-------|-------|-------|-------|-------|-------|-------|-------|-------|-------|-------|-------|-------|-------|-------|-------|-------|-------|-------|-------|-------|-------|-------|-------|-------|-------|-------|-------|-------|-------|-------|-------|-------|-------|-------|-------|-------|-------|-------|-------|-------|-------|-------|-------|-------|-------|-------|-------|-------|-------|-------|-------|-------|-------|-------|-------|-------|-------|-------|-------|-------|-------|-------|-------|-------|-------|-------|-------|-------|-------|-------|-------|-------|-------|-------|-------|-------|-------|-------|-------|-------|-------|-------|-------|-------|-------|-------|-------|-------|-------|-------|-------|-------|-------|-------|-------|-------|-------|-------|-------|-------|-------|-------|-------|-------|-------|-------|-------|-------|-------|-------|-------|-------|-------|-------|-------|-------|-------|-------|-------|-------|-------|-------|-------|-------|-------|-------|-------|-------|-------|-------|-------|-------|-------|-------|-------|-------|-------|-------|-------|-------|-------|-------|-------|-------|-------|-------|-------|-------|-------|-------|-------|-------|-------|-------|-------|-------|-------|-------|-------|-------|-------|-------|-------|-------|-------|-------|-------|-------|-------|-------|-------|-------|-------|-------|-------|-------|-------|-------|-------|-------|-------|-------|-------|-------|-------|-------|-------|-------|-------|-------|-------|-------|-------|-------|-------|-------|-------|-------|-------|-------|-------|-------|-------|-------|-------|-------|-------|-------|-------|-------|-------|-------|-------|-------|-------|-------|-------|-------|-------|-------|-------|-------|-------|-------|-------|-------|-------|-------|-------|-------|-------|-------|-------|-------|-------|-------|-------|-------|-------|-------|-------|-------|-------|-------|-------|-------|-------|-------|-------|-------|-------|-------|-------|-------|-------|-------|-------|-------|-------|-------|-------|-------|-------|-------|-------|-------|-------|-------|-------|-------|-------|-------|-------|-------|-------|-------|-------|-------|-------|-------|-------|-------|-------|-------|-------|-------|-------|-------|-------|-------|-------|-------|-------|-------|-------|-------|-------|-------|-------|-------|-------|-------|-------|-------|-------|-------|-------|-------|-------|-------|-------|-------|-------|-------|-------|-------|-------|-------|-------|-------|-------|-------|-------|-------|-------|-------|-------|-------|-------|-------|-------|-------|-------|-------|-------|-------|-------|-------|-------|-------|-------|-------|-------|-------|-------|-------|-------|-------|-------|-------|-------|-------|-------|-------|-------|-------|-------|-------|-------|-------|-------|-------|-------|-------|-------|-------|-------|-------|-------|-------|-------|-------|-------|-------|-------|-------|-------|-------|-------|-------|-------|-------|-------|-------|-------|-------|-------|-------|-------|-------|-------|-------|-------|-------|-------|-------|-------|-------|-------|-------|-------|-------|-------|-------|-------|-------|-------|-------|-------|-------|-------|-------|-------|-------|-------|-------|-------|-------|-------|-------|-------|-------|-------|-------|-------|-------|-------|-------|-------|-------|-------|-------|-------|-------|-------|-------|-------|-------|-------|-------|-------|-------|-------|-------|-------|-------|-------|-------|-------|-------|-------|-------|-------|-------|-------|-------|-------|-------|-------|-------|-------|-------|-------|-------|-------|-------|-------|-------|-------|-------|-------|-------|-------|-------|-------|-------|-------|-------|-------|-------|-------|-------|-------|-------|-------|-------|-------|-------|-------|-------|-------|-------|-------|-------|-------|-------|-------|-------|-------|-------|-------|-------|-------|-------|-------|-------|-------|-------|-------|-------|-------|-------|-------|-------|-------|-------|-------|-------|-------|-------|-------|-------|-------|-------|-------|--------|--------|--------|--------|--------|--------|--------|--------|--------|--------|--------|--------|--------|--------|--------|--------|--------|--------|--------|--------|--------|--------|--------|--------|--------|--------|--------|--------|--------|--------|--------|--------|--------|--------|--------|--------|--------|--------|--------|--------|--------|--------|--------|--------|--------|--------|--------|--------|--------|--------|--------|--------|--------|--------|--------|--------|--------|--------|--------|--------|--------|--------|--------|--------|--------|--------|--------|--------|--------|--------|--------|--------|--------|--------|--------|--------|--------|--------|--------|--------|--------|--------|--------|--------|--------|--------|--------|--------|--------|--------|--------|--------|--------|--------|--------|--------|--------|--------|--------|--------|--------|--------|--------|--------|--------|--------|--------|--------|--------|--------|--------|--------|--------|--------|--------|--------|--------|--------|--------|--------|--------|--------|--------|--------|--------|--------|--------|--------|--------|--------|--------|--------|--------|--------|--------|--------|--------|--------|--------|--------|--------|--------|--------|--------|--------|--------|--------|--------|--------|--------|--------|--------|--------|--------|--------|--------|--------|--------|--------|--------|--------|--------|--------|--------|--------|--------|--------|--------|--------|--------|--------|--------|--------|--------|--------|--------|--------|--------|--------|--------|--------|--------|--------|--------|--------|--------|--------|--------|--------|--------|--------|--------|--------|--------|--------|--------|--------|--------|--------|--------|--------|--------|--------|--------|--------|--------|--------|--------|--------|--------|--------|--------|--------|--------|--------|--------|--------|--------|--------|--------|--------|--------|--------|--------|--------|--------|--------|--------|--------|--------|--------|--------|--------|--------|--------|--------|--------|--------|--------|--------|--------|--------|--------|--------|--------|--------|--------|--------|--------|--------|--------|--------|--------|--------|--------|--------|--------|--------|--------|--------|--------|--------|--------|--------|--------|--------|--------|--------|--------|--------|--------|--------|--------|--------|--------|--------|--------|--------|--------|--------|--------|
|             | I1     | I2 | I3 | I4 | A1 | A10 | A11 | A12 | A2 | A3 | A4 | A5 | A5 | A6 | A7 | A8 | A9 | C1 | C2 | C3                  | C4 | C5 | C6 | C7 | C8 | C9 | M1 | M2 | M3 | M4 | M5 | DWH1 | DWH2 | DWH3 | DWH4 | DWH5 | DWH6 | DWH7 | Tu1      | Tu2 | Tu3 | Tu4 | Tu5 | Tu6 | Tu7 | Tu8 | Tu9 | Tu10 | Tu11             | Tu12 | Tu13 | Tu14 | Tu15 | Tu16 | Tu17 | Tu18 | Tu19 | Tu20 | OC1                      | OC2 | OC3 | OC4 | OC5 | OC6 | OC7 | OC8 | OC9 | OC10 | OC11 | OC12 | OC13                      | OC14 | OC15 | OC16 | OC17                   | OC18 | OC19 | OC20 | OC21 | OC22 | OC23 | OC24 | OC25           | OC26 | OC27 | OC28 | OC29 | OC30 | OC31 | OC32 | OC33                          | OC34 | OC35 | OC36 | OC37                            | OC38 | OC39 | OC40 | OC41                         | OC42 | OC43 | OC44 | OC45                                                                                      | OC46 | OC47 | OC48 | OC49 | OC50 | OC51 | OC52 | OC53 | OC54 | OC55 | OC56 | OC57 | OC58 |                                         | OC59 | OC60 | OC61 | OC62 | OC63 | OC64 | OC65 | OC66 | OC67 | OC68 | OC69 | OC70 | OC71 | OC72 | OC73 | OC74 | OC75 | OC76 | OC77 | OC78 | OC79 | OC80 | OC81 | OC82 | OC83 | OC84 | OC85 | OC86 | OC87 | OC88 | OC89 | OC90 | OC91 | OC92 | OC93 | OC94 | OC95 | OC96 | OC97 | OC98 | OC99 | OC100 | OC101 | OC102 | OC103 | OC104 | OC105 | OC106 | OC107 | OC108 | OC109 | OC110 | OC111 | OC112 | OC113 | OC114 | OC115 | OC116 | OC117 | OC118 | OC119 | OC120 | OC121 | OC122 | OC123 | OC124 | OC125 | OC126 | OC127 | OC128 | OC129 | OC130 | OC131 | OC132 | OC133 | OC134 | OC135 | OC136 | OC137 | OC138 | OC139 | OC140 | OC141 | OC142 | OC143 | OC144 | OC145 | OC146 | OC147 | OC148 | OC149 | OC150 | OC151 | OC152 | OC153 | OC154 | OC155 | OC156 | OC157 | OC158 | OC159 | OC160 | OC161 | OC162 | OC163 | OC164 | OC165 | OC166 | OC167 | OC168 | OC169 | OC170 | OC171 | OC172 | OC173 | OC174 | OC175 | OC176 | OC177 | OC178 | OC179 | OC180 | OC181 | OC182 | OC183 | OC184 | OC185 | OC186 | OC187 | OC188 | OC189 | OC190 | OC191 | OC192 | OC193 | OC194 | OC195 | OC196 | OC197 | OC198 | OC199 | OC200 | OC201 | OC202 | OC203 | OC204 | OC205 | OC206 | OC207 | OC208 | OC209 | OC210 | OC211 | OC212 | OC213 | OC214 | OC215 | OC216 | OC217 | OC218 | OC219 | OC220 | OC221 | OC222 | OC223 | OC224 | OC225 | OC226 | OC227 | OC228 | OC229 | OC230 | OC231 | OC232 | OC233 | OC234 | OC235 | OC236 | OC237 | OC238 | OC239 | OC240 | OC241 | OC242 | OC243 | OC244 | OC245 | OC246 | OC247 | OC248 | OC249 | OC250 | OC251 | OC252 | OC253 | OC254 | OC255 | OC256 | OC257 | OC258 | OC259 | OC260 | OC261 | OC262 | OC263 | OC264 | OC265 | OC266 | OC267 | OC268 | OC269 | OC270 | OC271 | OC272 | OC273 | OC274 | OC275 | OC276 | OC277 | OC278 | OC279 | OC280 | OC281 | OC282 | OC283 | OC284 | OC285 | OC286 | OC287 | OC288 | OC289 | OC290 | OC291 | OC292 | OC293 | OC294 | OC295 | OC296 | OC297 | OC298 | OC299 | OC300 | OC301 | OC302 | OC303 | OC304 | OC305 | OC306 | OC307 | OC308 | OC309 | OC310 | OC311 | OC312 | OC313 | OC314 | OC315 | OC316 | OC317 | OC318 | OC319 | OC320 | OC321 | OC322 | OC323 | OC324 | OC325 | OC326 | OC327 | OC328 | OC329 | OC330 | OC331 | OC332 | OC333 | OC334 | OC335 | OC336 | OC337 | OC338 | OC339 | OC340 | OC341 | OC342 | OC343 | OC344 | OC345 | OC346 | OC347 | OC348 | OC349 | OC350 | OC351 | OC352 | OC353 | OC354 | OC355 | OC356 | OC357 | OC358 | OC359 | OC360 | OC361 | OC362 | OC363 | OC364 | OC365 | OC366 | OC367 | OC368 | OC369 | OC370 | OC371 | OC372 | OC373 | OC374 | OC375 | OC376 | OC377 | OC378 | OC379 | OC380 | OC381 | OC382 | OC383 | OC384 | OC385 | OC386 | OC387 | OC388 | OC389 | OC390 | OC391 | OC392 | OC393 | OC394 | OC395 | OC396 | OC397 | OC398 | OC399 | OC400 | OC401 | OC402 | OC403 | OC404 | OC405 | OC406 | OC407 | OC408 | OC409 | OC410 | OC411 | OC412 | OC413 | OC414 | OC415 | OC416 | OC417 | OC418 | OC419 | OC420 | OC421 | OC422 | OC423 | OC424 | OC425 | OC426 | OC427 | OC428 | OC429 | OC430 | OC431 | OC432 | OC433 | OC434 | OC435 | OC436 | OC437 | OC438 | OC439 | OC440 | OC441 | OC442 | OC443 | OC444 | OC445 | OC446 | OC447 | OC448 | OC449 | OC450 | OC451 | OC452 | OC453 | OC454 | OC455 | OC456 | OC457 | OC458 | OC459 | OC460 | OC461 | OC462 | OC463 | OC464 | OC465 | OC466 | OC467 | OC468 | OC469 | OC470 | OC471 | OC472 | OC473 | OC474 | OC475 | OC476 | OC477 | OC478 | OC479 | OC480 | OC481 | OC482 | OC483 | OC484 | OC485 | OC486 | OC487 | OC488 | OC489 | OC490 | OC491 | OC492 | OC493 | OC494 | OC495 | OC496 | OC497 | OC498 | OC499 | OC500 | OC501 | OC502 | OC503 | OC504 | OC505 | OC506 | OC507 | OC508 | OC509 | OC510 | OC511 | OC512 | OC513 | OC514 | OC515 | OC516 | OC517 | OC518 | OC519 | OC520 | OC521 | OC522 | OC523 | OC524 | OC525 | OC526 | OC527 | OC528 | OC529 | OC530 | OC531 | OC532 | OC533 | OC534 | OC535 | OC536 | OC537 | OC538 | OC539 | OC540 | OC541 | OC542 | OC543 | OC544 | OC545 | OC546 | OC547 | OC548 | OC549 | OC550 | OC551 | OC552 | OC553 | OC554 | OC555 | OC556 | OC557 | OC558 | OC559 | OC560 | OC561 | OC562 | OC563 | OC564 | OC565 | OC566 | OC567 | OC568 | OC569 | OC570 | OC571 | OC572 | OC573 | OC574 | OC575 | OC576 | OC577 | OC578 | OC579 | OC580 | OC581 | OC582 | OC583 | OC584 | OC585 | OC586 | OC587 | OC588 | OC589 | OC590 | OC591 | OC592 | OC593 | OC594 | OC595 | OC596 | OC597 | OC598 | OC599 | OC600 | OC601 | OC602 | OC603 | OC604 | OC605 | OC606 | OC607 | OC608 | OC609 | OC610 | OC611 | OC612 | OC613 | OC614 | OC615 | OC616 | OC617 | OC618 | OC619 | OC620 | OC621 | OC622 | OC623 | OC624 | OC625 | OC626 | OC627 | OC628 | OC629 | OC630 | OC631 | OC632 | OC633 | OC634 | OC635 | OC636 | OC637 | OC638 | OC639 | OC640 | OC641 | OC642 | OC643 | OC644 | OC645 | OC646 | OC647 | OC648 | OC649 | OC650 | OC651 | OC652 | OC653 | OC654 | OC655 | OC656 | OC657 | OC658 | OC659 | OC660 | OC661 | OC662 | OC663 | OC664 | OC665 | OC666 | OC667 | OC668 | OC669 | OC670 | OC671 | OC672 | OC673 | OC674 | OC675 | OC676 | OC677 | OC678 | OC679 | OC680 | OC681 | OC682 | OC683 | OC684 | OC685 | OC686 | OC687 | OC688 | OC689 | OC690 | OC691 | OC692 | OC693 | OC694 | OC695 | OC696 | OC697 | OC698 | OC699 | OC700 | OC701 | OC702 | OC703 | OC704 | OC705 | OC706 | OC707 | OC708 | OC709 | OC710 | OC711 | OC712 | OC713 | OC714 | OC715 | OC716 | OC717 | OC718 | OC719 | OC720 | OC721 | OC722 | OC723 | OC724 | OC725 | OC726 | OC727 | OC728 | OC729 | OC730 | OC731 | OC732 | OC733 | OC734 | OC735 | OC736 | OC737 | OC738 | OC739 | OC740 | OC741 | OC742 | OC743 | OC744 | OC745 | OC746 | OC747 | OC748 | OC749 | OC750 | OC751 | OC752 | OC753 | OC754 | OC755 | OC756 | OC757 | OC758 | OC759 | OC760 | OC761 | OC762 | OC763 | OC764 | OC765 | OC766 | OC767 | OC768 | OC769 | OC770 | OC771 | OC772 | OC773 | OC774 | OC775 | OC776 | OC777 | OC778 | OC779 | OC780 | OC781 | OC782 | OC783 | OC784 | OC785 | OC786 | OC787 | OC788 | OC789 | OC790 | OC791 | OC792 | OC793 | OC794 | OC795 | OC796 | OC797 | OC798 | OC799 | OC800 | OC801 | OC802 | OC803 | OC804 | OC805 | OC806 | OC807 | OC808 | OC809 | OC810 | OC811 | OC812 | OC813 | OC814 | OC815 | OC816 | OC817 | OC818 | OC819 | OC820 | OC821 | OC822 | OC823 | OC824 | OC825 | OC826 | OC827 | OC828 | OC829 | OC830 | OC831 | OC832 | OC833 | OC834 | OC835 | OC836 | OC837 | OC838 | OC839 | OC840 | OC841 | OC842 | OC843 | OC844 | OC845 | OC846 | OC847 | OC848 | OC849 | OC850 | OC851 | OC852 | OC853 | OC854 | OC855 | OC856 | OC857 | OC858 | OC859 | OC860 | OC861 | OC862 | OC863 | OC864 | OC865 | OC866 | OC867 | OC868 | OC869 | OC870 | OC871 | OC872 | OC873 | OC874 | OC875 | OC876 | OC877 | OC878 | OC879 | OC880 | OC881 | OC882 | OC883 | OC884 | OC885 | OC886 | OC887 | OC888 | OC889 | OC890 | OC891 | OC892 | OC893 | OC894 | OC895 | OC896 | OC897 | OC898 | OC899 | OC900 | OC901 | OC902 | OC903 | OC904 | OC905 | OC906 | OC907 | OC908 | OC909 | OC910 | OC911 | OC912 | OC913 | OC914 | OC915 | OC916 | OC917 | OC918 | OC919 | OC920 | OC921 | OC922 | OC923 | OC924 | OC925 | OC926 | OC927 | OC928 | OC929 | OC930 | OC931 | OC932 | OC933 | OC934 | OC935 | OC936 | OC937 | OC938 | OC939 | OC940 | OC941 | OC942 | OC943 | OC944 | OC945 | OC946 | OC947 | OC948 | OC949 | OC950 | OC951 | OC952 | OC953 | OC954 | OC955 | OC956 | OC957 | OC958 | OC959 | OC960 | OC961 | OC962 | OC963 | OC964 | OC965 | OC966 | OC967 | OC968 | OC969 | OC970 | OC971 | OC972 | OC973 | OC974 | OC975 | OC976 | OC977 | OC978 | OC979 | OC980 | OC981 | OC982 | OC983 | OC984 | OC985 | OC986 | OC987 | OC988 | OC989 | OC990 | OC991 | OC992 | OC993 | OC994 | OC995 | OC996 | OC997 | OC998 | OC999 | OC1000 | OC1001 | OC1002 | OC1003 | OC1004 | OC1005 | OC1006 | OC1007 | OC1008 | OC1009 | OC1010 | OC1011 | OC1012 | OC1013 | OC1014 | OC1015 | OC1016 | OC1017 | OC1018 | OC1019 | OC1020 | OC1021 | OC1022 | OC1023 | OC1024 | OC1025 | OC1026 | OC1027 | OC1028 | OC1029 | OC1030 | OC1031 | OC1032 | OC1033 | OC1034 | OC1035 | OC1036 | OC1037 | OC1038 | OC1039 | OC1040 | OC1041 | OC1042 | OC1043 | OC1044 | OC1045 | OC1046 | OC1047 | OC1048 | OC1049 | OC1050 | OC1051 | OC1052 | OC1053 | OC1054 | OC1055 | OC1056 | OC1057 | OC1058 | OC1059 | OC1060 | OC1061 | OC1062 | OC1063 | OC1064 | OC1065 | OC1066 | OC1067 | OC1068 | OC1069 | OC1070 | OC1071 | OC1072 | OC1073 | OC1074 | OC1075 | OC1076 | OC1077 | OC1078 | OC1079 | OC1080 | OC1081 | OC1082 | OC1083 | OC1084 | OC1085 | OC1086 | OC1087 | OC1088 | OC1089 | OC1090 | OC1091 | OC1092 | OC1093 | OC1094 | OC1095 | OC1096 | OC1097 | OC1098 | OC1099 | OC1100 | OC1101 | OC1102 | OC1103 | OC1104 | OC1105 | OC1106 | OC1107 | OC1108 | OC1109 | OC1110 | OC1111 | OC1112 | OC1113 | OC1114 | OC1115 | OC1116 | OC1117 | OC1118 | OC1119 | OC1120 | OC1121 | OC1122 | OC1123 | OC1124 | OC1125 | OC1126 | OC1127 | OC1128 | OC1129 | OC1130 | OC1131 | OC1132 | OC1133 | OC1134 | OC1135 | OC1136 | OC1137 | OC1138 | OC1139 | OC1140 | OC1141 | OC1142 | OC1143 | OC1144 | OC1145 | OC1146 | OC1147 | OC1148 | OC1149 | OC1150 | OC1151 | OC1152 | OC1153 | OC1154 | OC1155 | OC1156 | OC1157 | OC1158 | OC1159 | OC1160 | OC1161 | OC1162 | OC1163 | OC1164 | OC1165 | OC1166 | OC1167 | OC1168 | OC1169 | OC1170 | OC1171 | OC1172 | OC1173 | OC1174 | OC1175 | OC1176 | OC1177 | OC1178 | OC1179 | OC1180 | OC1181 | OC1182 | OC1183 | OC1184 | OC1185 | OC1186 | OC1187 | OC1188 | OC1189 | OC1190 | OC1191 | OC1192 | OC1193 | OC1194 | OC1195 | OC1196 | OC1197 | OC1198 | OC1199 | OC1200 | OC1201 | OC1202 | OC1203 | OC1204 | OC1205 | OC1206 | OC1207 | OC1208 | OC1209 | OC1210 | OC1211 | OC1212 | OC1213 | OC1214 | OC1215 | OC1216 | OC1217 | OC1218 | OC1219 | OC1220 | OC1221 | OC1222 | OC1223 | OC1224 | OC1225 | OC1226 | OC1227 | OC1228 | OC1229 | OC1230 | OC1231 | OC1232 | OC1233 | OC1234 | OC1235 | OC1236 | OC1237 | OC1238 | OC1239 | OC1240 | OC1241 | OC1242 | OC1243 | OC1244 | OC1245 | OC1246 | OC1247 | OC1248 | OC1249 | OC1250 | OC1251 | OC1252 | OC1253 | OC1254 | OC1255 | OC1256 | OC1257 | OC1258 | OC1259 | OC1260 | OC1261 | OC1262 | OC1263 | OC1264 | OC1265 | OC1266 | OC1267 | OC1268 | OC1269 | OC1270 | OC1271 | OC1272 | OC1273 | OC1274 | OC1275 | OC1276 | OC1277 | OC1278 | OC1279 | OC1280 |





Supplementary data. Table S5. Summary table showing differentially abundant bacterial clades identified by LEfSe. (Family level biomarkers are labelled in blue, genus level biomarkers in red and species level biomarkers in green; Rows with biomarkers mentioned in the text are filled in blue).

| Differentially abundant Taxa | Habitat <sup>†</sup> | Taxonomy <sup>‡</sup>                                                                                                                  |
|------------------------------|----------------------|----------------------------------------------------------------------------------------------------------------------------------------|
| <i>Terriglobus</i>           | A                    | Bacteria   Acidobacteria   Acidobacteriia   Acidobacteriales   Acidobacteriaceae   <i>Terriglobus</i>                                  |
| <i>Solibacteres</i>          | A                    | Bacteria   Acidobacteria   Solibacteres                                                                                                |
| <i>Solibacterales</i>        | A                    | Bacteria   Acidobacteria   Solibacteres   Solibacterales                                                                               |
| <i>Actinobacteria</i>        | A                    | Bacteria   Actinobacteria                                                                                                              |
| <i>lamiaceae</i>             | A                    | Bacteria   Actinobacteria   Acidimicrobiia   Acidimicrobiales   <i>lamiaceae</i>                                                       |
| <i>lamia</i>                 | A                    | Bacteria   Actinobacteria   Acidimicrobiia   Acidimicrobiales   <i>lamiaceae</i>   <i>lamia</i>                                        |
| <i>Actinobacteria</i>        | A                    | Bacteria   Actinobacteria   Actinobacteria                                                                                             |
| <i>Actinomycetales</i>       | A                    | Bacteria   Actinobacteria   Actinobacteria   Actinomycetales                                                                           |
| <i>Microbacteriaceae</i>     | A                    | Bacteria   Actinobacteria   Actinobacteria   Actinomycetales   <i>Microbacteriaceae</i>                                                |
| <i>Microbacterium</i>        | A                    | Bacteria   Actinobacteria   Actinobacteria   Actinomycetales   <i>Microbacteriaceae</i>   <i>Microbacterium</i>                        |
| <i>Salinibacterium</i>       | A                    | Bacteria   Actinobacteria   Actinobacteria   Actinomycetales   <i>Microbacteriaceae</i>   <i>Salinibacterium</i>                       |
| <i>amurskyense</i>           | A                    | Bacteria   Actinobacteria   Actinobacteria   Actinomycetales   <i>Microbacteriaceae</i>   <i>Salinibacterium</i>   <i>amurskyense</i>  |
| <i>Sphingobacteriia</i>      | A                    | Bacteria   Bacteroidetes   Sphingobacteriia                                                                                            |
| <i>Sphingobacteriales</i>    | A                    | Bacteria   Bacteroidetes   Sphingobacteriia   Sphingobacteriales                                                                       |
| <i>Gemmatimonadetes</i>      | A                    | Bacteria   Gemmatimonadetes   Gemmatimonadetes                                                                                         |
| <i>Gemmatimonadales</i>      | A                    | Bacteria   Gemmatimonadetes   Gemmatimonadetes   Gemmatimonadales                                                                      |
| <i>Acidobacteria 6</i>       | C                    | Bacteria   Acidobacteria   Acidobacteria 6                                                                                             |
| <i>iii1 15</i>               | C                    | Bacteria   Acidobacteria   Acidobacteria 6   <i>iii1 15</i>                                                                            |
| <i>mb2424</i>                | C                    | Bacteria   Acidobacteria   Acidobacteria 6   <i>iii1 15</i>   <i>mb2424</i>                                                            |
| <i>Chloracidobacteria</i>    | C                    | Bacteria   Acidobacteria   Chloracidobacteria                                                                                          |
| <i>RB41</i>                  | C                    | Bacteria   Acidobacteria   Chloracidobacteria   <i>RB41</i>                                                                            |
| <i>Ellin6075</i>             | C                    | Bacteria   Acidobacteria   Chloracidobacteria   <i>RB41</i>   <i>Ellin6075</i>                                                         |
| <i>Dietziaceae</i>           | C                    | Bacteria   Actinobacteria   Actinobacteria   Actinomycetales   <i>Dietziaceae</i>                                                      |
| <i>Dietzia</i>               | C                    | Bacteria   Actinobacteria   Actinobacteria   Actinomycetales   <i>Dietziaceae</i>   <i>Dietzia</i>                                     |
| <i>Geodermatophilaceae</i>   | C                    | Bacteria   Actinobacteria   Actinobacteria   Actinomycetales   <i>Geodermatophilaceae</i>                                              |
| <i>Arthrobacter</i>          | C                    | Bacteria   Actinobacteria   Actinobacteria   Actinomycetales   <i>Micrococcaceae</i>   <i>Arthrobacter</i>                             |
| <i>psychrolactophilus</i>    | C                    | Bacteria   Actinobacteria   Actinobacteria   Actinomycetales   <i>Micrococcaceae</i>   <i>Arthrobacter</i>   <i>psychrolactophilus</i> |

|                              |   |                                                                                       |
|------------------------------|---|---------------------------------------------------------------------------------------|
| <i>Micromonosporaceae</i>    | C | Bacteria Actinobacteria Actinobacteria Actinomycetales Micromonosporaceae             |
| <i>Mycobacteriaceae</i>      | C | Bacteria Actinobacteria Actinobacteria Actinomycetales Mycobacteriaceae               |
| <i>Mycobacterium</i>         | C | Bacteria Actinobacteria Actinobacteria Actinomycetales Mycobacteriaceae Mycobacterium |
| <i>Nocardiaceae</i>          | C | Bacteria Actinobacteria Actinobacteria Actinomycetales Nocardiaceae                   |
| <i>Thermoleophilia</i>       | C | Bacteria Actinobacteria Thermoleophilia                                               |
| <i>Solirubrobacterales</i>   | C | Bacteria Actinobacteria Thermoleophilia Solirubrobacterales                           |
| <i>Solirubrobacteraceae</i>  | C | Bacteria Actinobacteria Thermoleophilia Solirubrobacterales Solirubrobacteraceae      |
| <i>Cytophagia</i>            | C | Bacteria Bacteroidetes Cytophagia                                                     |
| <i>Cytophagales</i>          | C | Bacteria Bacteroidetes Cytophagia Cytophagales                                        |
| <i>Cytophagaceae</i>         | C | Bacteria Bacteroidetes Cytophagia Cytophagales Cytophagaceae                          |
| <i>Chloroflexi</i>           | C | Bacteria Chloroflexi                                                                  |
| <i>Chloroflexi</i>           | C | Bacteria Chloroflexi Chloroflexi                                                      |
| <i>Roseiflexales</i>         | C | Bacteria Chloroflexi Chloroflexi Roseiflexales                                        |
| <i>Kouleothrixaceae</i>      | C | Bacteria Chloroflexi Chloroflexi Roseiflexales Kouleothrixaceae                       |
| <i>Ellin6529</i>             | C | Bacteria Chloroflexi Ellin6529                                                        |
| <i>JG30 KF AS9</i>           | C | Bacteria Chloroflexi Ktedonobacteria JG30 KF AS9                                      |
| <i>S085</i>                  | C | Bacteria Chloroflexi S085                                                             |
| <i>Thermomicrobia</i>        | C | Bacteria Chloroflexi Thermomicrobia                                                   |
| <i>JG30 KF CM45</i>          | C | Bacteria Chloroflexi Thermomicrobia JG30 KF CM45                                      |
| <i>TK10</i>                  | C | Bacteria Chloroflexi TK10                                                             |
| <i>AKYG885</i>               | C | Bacteria Chloroflexi TK10 AKYG885                                                     |
| <i>Dolo 23</i>               | C | Bacteria Chloroflexi TK10 AKYG885 Dolo 23                                             |
| <i>TK17</i>                  | C | Bacteria Chloroflexi TK17                                                             |
| <i>mle1 48</i>               | C | Bacteria Chloroflexi TK17 mle1 48                                                     |
| <i>Cyanobacteria</i>         | C | Bacteria Cyanobacteria                                                                |
| <i>Oscillatoriophycideae</i> | C | Bacteria Cyanobacteria Oscillatoriophycideae                                          |
| <i>Synechococcophycideae</i> | C | Bacteria Cyanobacteria Synechococcophycideae                                          |
| <i>Bacillales</i>            | C | Bacteria Firmicutes Bacilli Bacillales                                                |
| <i>Gemmatimonadetes</i>      | C | Bacteria Gemmatimonadetes                                                             |
| <i>Gemm 3</i>                | C | Bacteria Gemmatimonadetes Gemm 3                                                      |
| <i>Gemm 5</i>                | C | Bacteria Gemmatimonadetes Gemm 5                                                      |
| <i>Planctomycetes</i>        | C | Bacteria Planctomycetes                                                               |

|                            |     |                                                                                                          |
|----------------------------|-----|----------------------------------------------------------------------------------------------------------|
| <i>Phycisphaerae</i>       | C   | Bacteria   Planctomycetes   Phycisphaerae                                                                |
| <i>Planctomycetia</i>      | C   | Bacteria   Planctomycetes   Planctomycetia                                                               |
| <i>Gemmatales</i>          | C   | Bacteria   Planctomycetes   Planctomycetia   Gemmatales                                                  |
| <i>Gemmataceae</i>         | C   | Bacteria   Planctomycetes   Planctomycetia   Gemmatales   Gemmataceae                                    |
| <i>Pirellulales</i>        | C   | Bacteria   Planctomycetes   Planctomycetia   Pirellulales                                                |
| <i>Pirellulaceae</i>       | C   | Bacteria   Planctomycetes   Planctomycetia   Pirellulales   Pirellulaceae                                |
| <i>Planctomycetales</i>    | C   | Bacteria   Planctomycetes   Planctomycetia   Planctomycetales                                            |
| <i>Planctomycetaceae</i>   | C   | Bacteria   Planctomycetes   Planctomycetia   Planctomycetales   Planctomycetaceae                        |
| <i>Planctomyces</i>        | C   | Bacteria   Planctomycetes   Planctomycetia   Planctomycetales   Planctomycetaceae   Planctomyces         |
| <i>Kaistobacter</i>        | C   | Bacteria   Proteobacteria   Alphaproteobacteria   Sphingomonadales   Sphingomonadaceae   Kaistobacter    |
| <i>Janthinobacterium</i>   | C   | Bacteria   Proteobacteria   Betaproteobacteria   Burkholderiales   Oxalobacteraceae   Janthinobacterium  |
| <i>Myxococcales</i>        | C   | Bacteria   Proteobacteria   Deltaproteobacteria   Myxococcales                                           |
| <i>Myxococcaceae</i>       | C   | Bacteria   Proteobacteria   Deltaproteobacteria   Myxococcales   Myxococcaceae                           |
| <i>Anaeromyxobacter</i>    | C   | Bacteria   Proteobacteria   Deltaproteobacteria   Myxococcales   Myxococcaceae   Anaeromyxobacter        |
| <i>Verrucomicrobia</i>     | C   | Bacteria   Verrucomicrobia                                                                               |
| <i>Opitutae</i>            | C   | Bacteria   Verrucomicrobia   Opitutae                                                                    |
| <i>Opitales</i>            | C   | Bacteria   Verrucomicrobia   Opitutae   Opitales                                                         |
| <i>Opitutaceae</i>         | C   | Bacteria   Verrucomicrobia   Opitutae   Opitales   Opitutaceae                                           |
| <i>Opitutus</i>            | C   | Bacteria   Verrucomicrobia   Opitutae   Opitales   Opitutaceae   Opitutus                                |
| <i>Spartobacteria</i>      | C   | Bacteria   Verrucomicrobia   Spartobacteria                                                              |
| <i>Chthoniobacteriales</i> | C   | Bacteria   Verrucomicrobia   Spartobacteria   Chthoniobacteriales                                        |
| <i>Chthoniobacteraceae</i> | C   | Bacteria   Verrucomicrobia   Spartobacteria   Chthoniobacteriales   Chthoniobacteraceae                  |
| <i>Chthoniobacter</i>      | C   | Bacteria   Verrucomicrobia   Spartobacteria   Chthoniobacteriales   Chthoniobacteraceae   Chthoniobacter |
| <i>DA101</i>               | C   | Bacteria   Verrucomicrobia   Spartobacteria   Chthoniobacteriales   Chthoniobacteraceae   DA101          |
| <i>Luteolibacter</i>       | C   | Bacteria   Verrucomicrobia   Verrucomicrobiae   Verrucomicrobiales   Verrucomicrobiaceae   Luteolibacter |
| <i>Bacteroidetes</i>       | DWH | Bacteria   Bacteroidetes                                                                                 |
| <i>Flavobacteriia</i>      | DWH | Bacteria   Bacteroidetes   Flavobacteriia                                                                |
| <i>Flavobacteriales</i>    | DWH | Bacteria   Bacteroidetes   Flavobacteriia   Flavobacteriales                                             |
| <i>Flavobacteriaceae</i>   | DWH | Bacteria   Bacteroidetes   Flavobacteriia   Flavobacteriales   Flavobacteriaceae                         |
| <i>Weeksellaceae</i>       | DWH | Bacteria   Bacteroidetes   Flavobacteriia   Flavobacteriales   Weeksellaceae                             |
| <i>Chryseobacterium</i>    | DWH | Bacteria   Bacteroidetes   Flavobacteriia   Flavobacteriales   Weeksellaceae   Chryseobacterium          |
| <i>BD7 3</i>               | DWH | Bacteria   Proteobacteria   Alphaproteobacteria   BD7 3                                                  |

|                              |     |                                                                                                            |
|------------------------------|-----|------------------------------------------------------------------------------------------------------------|
| <i>Rhodobacterales</i>       | DWH | Bacteria   Proteobacteria   Alphaproteobacteria   Rhodobacterales                                          |
| <i>Rhodobacteraceae</i>      | DWH | Bacteria   Proteobacteria   Alphaproteobacteria   Rhodobacterales   Rhodobacteraceae                       |
| <i>Octadecabacter</i>        | DWH | Bacteria   Proteobacteria   Alphaproteobacteria   Rhodobacterales   Rhodobacteraceae   Octadecabacter      |
| <i>Phaeobacter</i>           | DWH | Bacteria   Proteobacteria   Alphaproteobacteria   Rhodobacterales   Rhodobacteraceae   Phaeobacter         |
| <i>Epsilonproteobacteria</i> | DWH | Bacteria   Proteobacteria   Epsilonproteobacteria                                                          |
| <i>Campylobacterales</i>     | DWH | Bacteria   Proteobacteria   Epsilonproteobacteria   Campylobacterales                                      |
| <i>Gammaproteobacteria</i>   | DWH | Bacteria   Proteobacteria   Gammaproteobacteria                                                            |
| <i>Alteromonadales</i>       | DWH | Bacteria   Proteobacteria   Gammaproteobacteria   Alteromonadales                                          |
| <i>Alteromonadaceae</i>      | DWH | Bacteria   Proteobacteria   Gammaproteobacteria   Alteromonadales   Alteromonadaceae                       |
| <i>HB2 32 21</i>             | DWH | Bacteria   Proteobacteria   Gammaproteobacteria   Alteromonadales   Alteromonadaceae   HB2 32 21           |
| <i>Colwelliaceae</i>         | DWH | Bacteria   Proteobacteria   Gammaproteobacteria   Alteromonadales   Colwelliaceae                          |
| <i>Marinicellales</i>        | DWH | Bacteria   Proteobacteria   Gammaproteobacteria   Marinicellales                                           |
| <i>Marinicellaceae</i>       | DWH | Bacteria   Proteobacteria   Gammaproteobacteria   Marinicellales   Marinicellaceae                         |
| <i>Xanthomonadales</i>       | DWH | Bacteria   Proteobacteria   Gammaproteobacteria   Xanthomonadales                                          |
| <i>Xanthomonadaceae</i>      | DWH | Bacteria   Proteobacteria   Gammaproteobacteria   Xanthomonadales   Xanthomonadaceae                       |
| <i>Verrucomicrobiae</i>      | DWH | Bacteria   Verrucomicrobia   Verrucomicrobiae                                                              |
| <i>Verrucomicrobiales</i>    | DWH | Bacteria   Verrucomicrobia   Verrucomicrobiae   Verrucomicrobiales                                         |
| <i>Verrucomicrobiaceae</i>   | DWH | Bacteria   Verrucomicrobia   Verrucomicrobiae   Verrucomicrobiales   Verrucomicrobiaceae                   |
| <i>Persicirhabdus</i>        | DWH | Bacteria   Verrucomicrobia   Verrucomicrobiae   Verrucomicrobiales   Verrucomicrobiaceae   Persicirhabdus  |
| <i>Acidobacteria</i>         | I   | Bacteria   Acidobacteria                                                                                   |
| <i>Acidobacteriia</i>        | I   | Bacteria   Acidobacteria   Acidobacteriia                                                                  |
| <i>Acidobacteriales</i>      | I   | Bacteria   Acidobacteria   Acidobacteriia   Acidobacteriales                                               |
| <i>Acidobacteriaceae</i>     | I   | Bacteria   Acidobacteria   Acidobacteriia   Acidobacteriales   Acidobacteriaceae                           |
| <i>Edaphobacter</i>          | I   | Bacteria   Acidobacteria   Acidobacteriia   Acidobacteriales   Acidobacteriaceae   Edaphobacter            |
| <i>modestum</i>              | I   | Bacteria   Acidobacteria   Acidobacteriia   Acidobacteriales   Acidobacteriaceae   Edaphobacter   modestum |
| <i>Koribacteraceae</i>       | I   | Bacteria   Acidobacteria   Acidobacteriia   Acidobacteriales   Koribacteraceae                             |
| <i>Candidatus Koribacter</i> | I   | Bacteria   Acidobacteria   Acidobacteriia   Acidobacteriales   Koribacteraceae   Candidatus Koribacter     |
| <i>Saprosirae</i>            | I   | Bacteria   Bacteroidetes   Saprosirae                                                                      |
| <i>Saprosirales</i>          | I   | Bacteria   Bacteroidetes   Saprosirae   Saprosirales                                                       |
| <i>Chitinophagaceae</i>      | I   | Bacteria   Bacteroidetes   Saprosirae   Saprosirales   Chitinophagaceae                                    |
| <i>Chlorobi</i>              | I   | Bacteria   Chlorobi                                                                                        |
| <i>Ignavibacteria</i>        | I   | Bacteria   Chlorobi   Ignavibacteria                                                                       |

|                             |     |                                                                                                                  |
|-----------------------------|-----|------------------------------------------------------------------------------------------------------------------|
| <i>Ignavibacteriales</i>    | I   | Bacteria   Chlorobi   Ignavibacteria   Ignavibacteriales                                                         |
| <i>Ignavibacteriaceae</i>   | I   | Bacteria   Chlorobi   Ignavibacteria   Ignavibacteriales   Ignavibacteriaceae                                    |
| <i>Rhodospirillales</i>     | I   | Bacteria   Proteobacteria   Alphaproteobacteria   Rhodospirillales                                               |
| <i>Acetobacteraceae</i>     | I   | Bacteria   Proteobacteria   Alphaproteobacteria   Rhodospirillales   Acetobacteraceae                            |
| <i>Rhodospirillaceae</i>    | I   | Bacteria   Proteobacteria   Alphaproteobacteria   Rhodospirillales   Rhodospirillaceae                           |
| <i>Methylibium</i>          | I   | Bacteria   Proteobacteria   Betaproteobacteria   Burkholderiales   Comamonadaceae   Methylibium                  |
| <i>petroleiphilum</i>       | I   | Bacteria   Proteobacteria   Betaproteobacteria   Burkholderiales   Comamonadaceae   Methylibium   petroleiphilum |
| <i>Hydrogenophilales</i>    | I   | Bacteria   Proteobacteria   Betaproteobacteria   Hydrogenophilales                                               |
| <i>Hydrogenophilaceae</i>   | I   | Bacteria   Proteobacteria   Betaproteobacteria   Hydrogenophilales   Hydrogenophilaceae                          |
| <i>Thiobacillus</i>         | I   | Bacteria   Proteobacteria   Betaproteobacteria   Hydrogenophilales   Hydrogenophilaceae   Thiobacillus           |
| <i>Sinobacteraceae</i>      | I   | Bacteria   Proteobacteria   Gammaproteobacteria   Xanthomonadales   Sinobacteraceae                              |
| <i>Acidimicrobiia</i>       | M   | Bacteria   Actinobacteria   Acidimicrobiia                                                                       |
| <i>Acidimicrobiales</i>     | M   | Bacteria   Actinobacteria   Acidimicrobiia   Acidimicrobiales                                                    |
| <i>Chloroplast</i>          | M   | Bacteria   Cyanobacteria   Chloroplast                                                                           |
| <i>GN04</i>                 | M   | Bacteria   GN04                                                                                                  |
| <i>GN15</i>                 | M   | Bacteria   GN04   GN15                                                                                           |
| <i>OP8</i>                  | M   | Bacteria   OP8                                                                                                   |
| <i>Phycisphaerales</i>      | M   | Bacteria   Planctomycetes   Phycisphaerae   Phycisphaerales                                                      |
| <i>Phycisphaeraceae</i>     | M   | Bacteria   Planctomycetes   Phycisphaerae   Phycisphaerales   Phycisphaeraceae                                   |
| <i>Erythrobacteraceae</i>   | M   | Bacteria   Proteobacteria   Alphaproteobacteria   Sphingomonadales   Erythrobacteraceae                          |
| <i>Desulfobacterales</i>    | M   | Bacteria   Proteobacteria   Deltaproteobacteria   Desulfobacterales                                              |
| <i>Desulfuromonadaceae</i>  | M   | Bacteria   Proteobacteria   Deltaproteobacteria   Desulfuromonadales   Desulfuromonadaceae                       |
| <i>Oceanospirillales</i>    | M   | Bacteria   Proteobacteria   Gammaproteobacteria   Oceanospirillales                                              |
| <i>Spirochaetes</i>         | M   | Bacteria   Spirochaetes                                                                                          |
| <i>Spirochaetes</i>         | M   | Bacteria   Spirochaetes   Spirochaetes                                                                           |
| <i>Spirochaetales</i>       | M   | Bacteria   Spirochaetes   Spirochaetes   Spirochaetales                                                          |
| <i>Spirochaetaceae</i>      | M   | Bacteria   Spirochaetes   Spirochaetes   Spirochaetales   Spirochaetaceae                                        |
| <i>Pedosphaerae</i>         | M   | Bacteria   Verrucomicrobia   Pedosphaerae                                                                        |
| <i>Pedosphaerales</i>       | M   | Bacteria   Verrucomicrobia   Pedosphaerae   Pedosphaerales                                                       |
| <i>Sediment 1</i>           | M   | Bacteria   WS3   PRR 12   Sediment 1                                                                             |
| <i>Propionibacteriaceae</i> | OSC | Bacteria   Actinobacteria   Actinobacteria   Actinomycetales   Propionibacteriaceae                              |
| <i>Propionibacterium</i>    | OSC | Bacteria   Actinobacteria   Actinobacteria   Actinomycetales   Propionibacteriaceae   Propionibacterium          |

|                            |       |                                                                                                                     |
|----------------------------|-------|---------------------------------------------------------------------------------------------------------------------|
| <i>Sediminibacterium</i>   | OSC   | Bacteria   Bacteroidetes   Saprospirae   Saprospirales   Chitinophagaceae   Sediminibacterium                       |
| <i>Bacilli</i>             | OSC   | Bacteria   Firmicutes   Bacilli                                                                                     |
| <i>Proteobacteria</i>      | OSC   | Bacteria   Proteobacteria                                                                                           |
| <i>Rhizobiales</i>         | OSC   | Bacteria   Proteobacteria   Alphaproteobacteria   Rhizobiales                                                       |
| <i>Brucellaceae</i>        | OSC   | Bacteria   Proteobacteria   Alphaproteobacteria   Rhizobiales   Brucellaceae                                        |
| <i>Ochrobactrum</i>        | OSC   | Bacteria   Proteobacteria   Alphaproteobacteria   Rhizobiales   Brucellaceae   Ochrobactrum                         |
| <i>intermedium</i>         | OSC   | Bacteria   Proteobacteria   Alphaproteobacteria   Rhizobiales   Brucellaceae   Ochrobactrum   intermedium           |
| <i>Methylobacteriaceae</i> | OSC   | Bacteria   Proteobacteria   Alphaproteobacteria   Rhizobiales   Methylobacteriaceae                                 |
| <i>Methylobacterium</i>    | OSC   | Bacteria   Proteobacteria   Alphaproteobacteria   Rhizobiales   Methylobacteriaceae   Methylobacterium              |
| <i>adhaesivum</i>          | OSC   | Bacteria   Proteobacteria   Alphaproteobacteria   Rhizobiales   Methylobacteriaceae   Methylobacterium   adhaesivum |
| <i>Delftia</i>             | OSC   | Bacteria   Proteobacteria   Betaproteobacteria   Burkholderiales   Comamonadaceae   Delftia                         |
| <i>Oxalobacteraceae</i>    | OSC   | Bacteria   Proteobacteria   Betaproteobacteria   Burkholderiales   Oxalobacteraceae                                 |
| <i>Cupriavidus</i>         | OSC   | Bacteria   Proteobacteria   Betaproteobacteria   Burkholderiales   Oxalobacteraceae   Cupriavidus                   |
| <i>gilardii</i>            | OSC   | Bacteria   Proteobacteria   Betaproteobacteria   Burkholderiales   Oxalobacteraceae   Cupriavidus   gilardii        |
| <i>Enterobacteriales</i>   | OSC   | Bacteria   Proteobacteria   Gammaproteobacteria   Enterobacteriales                                                 |
| <i>Enterobacteriaceae</i>  | OSC   | Bacteria   Proteobacteria   Gammaproteobacteria   Enterobacteriales   Enterobacteriaceae                            |
| <i>Pseudomonadales</i>     | OSC   | Bacteria   Proteobacteria   Gammaproteobacteria   Pseudomonadales                                                   |
| <i>Moraxellaceae</i>       | OSC   | Bacteria   Proteobacteria   Gammaproteobacteria   Pseudomonadales   Moraxellaceae                                   |
| <i>Acinetobacter</i>       | OSC   | Bacteria   Proteobacteria   Gammaproteobacteria   Pseudomonadales   Moraxellaceae   Acinetobacter                   |
| <i>Caldiserica</i>         | OSTPd | Bacteria   Caldiserica                                                                                              |
| <i>Caldisericia</i>        | OSTPd | Bacteria   Caldiserica   Caldisericia                                                                               |
| <i>Caldisericales</i>      | OSTPd | Bacteria   Caldiserica   Caldisericia   Caldisericales                                                              |
| <i>Betaproteobacteria</i>  | OSTPd | Bacteria   Proteobacteria   Betaproteobacteria                                                                      |
| <i>Rhodocyclales</i>       | OSTPd | Bacteria   Proteobacteria   Betaproteobacteria   Rhodocyclales                                                      |
| <i>Rhodocyclaceae</i>      | OSTPd | Bacteria   Proteobacteria   Betaproteobacteria   Rhodocyclales   Rhodocyclaceae                                     |
| <i>PYR10d3</i>             | OSTPd | Bacteria   Proteobacteria   Gammaproteobacteria   PYR10d3                                                           |
| <i>Bacteroidia</i>         | OSTPm | Bacteria   Bacteroidetes   Bacteroidia                                                                              |
| <i>Bacteroidales</i>       | OSTPm | Bacteria   Bacteroidetes   Bacteroidia   Bacteroidales                                                              |
| <i>Anaerolineae</i>        | OSTPm | Bacteria   Chloroflexi   Anaerolineae                                                                               |
| <i>Anaerolineales</i>      | OSTPm | Bacteria   Chloroflexi   Anaerolineae   Anaerolineales                                                              |
| <i>Anaerolinaceae</i>      | OSTPm | Bacteria   Chloroflexi   Anaerolineae   Anaerolineales   Anaerolinaceae                                             |
| <i>SHD 231</i>             | OSTPm | Bacteria   Chloroflexi   Anaerolineae   Anaerolineales   Anaerolinaceae   SHD 231                                   |

|                             |       |                                                                                           |
|-----------------------------|-------|-------------------------------------------------------------------------------------------|
| <i>T78</i>                  | OSTPm | Bacteria Chloroflexi Anaerolineae Anaerolineales Anaerolinaceae T78                       |
| <i>Dehalococcoidetes</i>    | OSTPm | Bacteria Chloroflexi Dehalococcoidetes                                                    |
| <i>Nitrospirae</i>          | OSTPm | Bacteria Nitrospirae                                                                      |
| <i>Nitrospira</i>           | OSTPm | Bacteria Nitrospirae Nitrospira                                                           |
| <i>Nitrospirales</i>        | OSTPm | Bacteria Nitrospirae Nitrospira Nitrospirales                                             |
| <i>Thauera</i>              | OSTPm | Bacteria Proteobacteria Betaproteobacteria Rhodocyclales Rhodocyclaceae Thauera           |
| <i>Deltaproteobacteria</i>  | OSTPm | Bacteria Proteobacteria Deltaproteobacteria                                               |
| <i>Desulfobulbaceae</i>     | OSTPm | Bacteria Proteobacteria Deltaproteobacteria Desulfobacteriales Desulfobulbaceae           |
| <i>Desulfuromonadales</i>   | OSTPm | Bacteria Proteobacteria Deltaproteobacteria Desulfuromonadales                            |
| <i>Syntrophobacteriales</i> | OSTPm | Bacteria Proteobacteria Deltaproteobacteria Syntrophobacteriales                          |
| <i>Syntrophaceae</i>        | OSTPm | Bacteria Proteobacteria Deltaproteobacteria Syntrophobacteriales Syntrophaceae            |
| <i>Syntrophus</i>           | OSTPm | Bacteria Proteobacteria Deltaproteobacteria Syntrophobacteriales Syntrophaceae Syntrophus |
| <i>Pseudomonadaceae</i>     | OSTPm | Bacteria Proteobacteria Gammaproteobacteria Pseudomonadales Pseudomonadaceae              |
| <i>Pseudomonas</i>          | OSTPm | Bacteria Proteobacteria Gammaproteobacteria Pseudomonadales Pseudomonadaceae Pseudomonas  |
| <i>Treponema</i>            | OSTPm | Bacteria Spirochaetes Spirochaetes Spirochaetales Spirochaetaceae Treponema               |
| WS3                         | OSTPm | Bacteria WS3                                                                              |
| PRR 12                      | OSTPm | Bacteria WS3 PRR 12                                                                       |
| SSS58A                      | OSTPm | Bacteria WS3 PRR 12 SSS58A                                                                |
| AC1                         | OSTPu | Bacteria AC1                                                                              |
| OPB41                       | OSTPu | Bacteria Actinobacteria OPB41                                                             |
| <i>Firmicutes</i>           | OSTPu | Bacteria Firmicutes                                                                       |
| <i>Clostridia</i>           | OSTPu | Bacteria Firmicutes Clostridia                                                            |
| <i>Clostridiales</i>        | OSTPu | Bacteria Firmicutes Clostridia Clostridiales                                              |
| <i>Peptococcaceae</i>       | OSTPu | Bacteria Firmicutes Clostridia Clostridiales Peptococcaceae                               |
| <i>Pelotomaculum</i>        | OSTPu | Bacteria Firmicutes Clostridia Clostridiales Peptococcaceae Pelotomaculum                 |
| <i>Burkholderiales</i>      | OSTPu | Bacteria Proteobacteria Betaproteobacteria Burkholderiales                                |
| <i>Comamonadaceae</i>       | OSTPu | Bacteria Proteobacteria Betaproteobacteria Burkholderiales Comamonadaceae                 |
| <i>Polaromonas</i>          | OSTPu | Bacteria Proteobacteria Betaproteobacteria Burkholderiales Comamonadaceae Polaromonas     |
| <i>Rhodoferax</i>           | OSTPu | Bacteria Proteobacteria Betaproteobacteria Burkholderiales Comamonadaceae Rhodoferax      |
| <i>Geobacteraceae</i>       | OSTPu | Bacteria Proteobacteria Deltaproteobacteria Desulfuromonadales Geobacteraceae             |
| <i>Geobacter</i>            | OSTPu | Bacteria Proteobacteria Deltaproteobacteria Desulfuromonadales Geobacteraceae Geobacter   |
| <i>Syntrophorhabdaceae</i>  | OSTPu | Bacteria Proteobacteria Deltaproteobacteria Syntrophobacteriales Syntrophorhabdaceae      |

|                                |       |                                                                                                                       |
|--------------------------------|-------|-----------------------------------------------------------------------------------------------------------------------|
| WS6                            | OSTPu | Bacteria   WS6                                                                                                        |
| SC72                           | OSTPu | Bacteria   WS6   SC72                                                                                                 |
| <i>Gaiellales</i>              | Tb    | Bacteria   Actinobacteria   Thermoleophilia   Gaiellales                                                              |
| <i>Gaiellaceae</i>             | Tb    | Bacteria   Actinobacteria   Thermoleophilia   Gaiellales   Gaiellaceae                                                |
| <i>Alphaproteobacteria</i>     | Tb    | Bacteria   Proteobacteria   Alphaproteobacteria                                                                       |
| <i>Caulobacterales</i>         | Tb    | Bacteria   Proteobacteria   Alphaproteobacteria   Caulobacterales                                                     |
| <i>Caulobacteraceae</i>        | Tb    | Bacteria   Proteobacteria   Alphaproteobacteria   Caulobacterales   Caulobacteraceae                                  |
| <i>Arthrospira</i>             | Tb    | Bacteria   Proteobacteria   Alphaproteobacteria   Caulobacterales   Caulobacteraceae   Arthrospira                    |
| <i>fusiformis</i>              | Tb    | Bacteria   Proteobacteria   Alphaproteobacteria   Caulobacterales   Caulobacteraceae   Arthrospira   fusiformis       |
| <i>Caulobacter</i>             | Tb    | Bacteria   Proteobacteria   Alphaproteobacteria   Caulobacterales   Caulobacteraceae   Caulobacter                    |
| <i>henricii</i>                | Tb    | Bacteria   Proteobacteria   Alphaproteobacteria   Caulobacterales   Caulobacteraceae   Caulobacter   henricii         |
| <i>Bradyrhizobiaceae</i>       | Tb    | Bacteria   Proteobacteria   Alphaproteobacteria   Rhizobiales   Bradyrhizobiaceae                                     |
| <i>Bradyrhizobium</i>          | Tb    | Bacteria   Proteobacteria   Alphaproteobacteria   Rhizobiales   Bradyrhizobiaceae   Bradyrhizobium                    |
| <i>Hyphomicrobiaceae</i>       | Tb    | Bacteria   Proteobacteria   Alphaproteobacteria   Rhizobiales   Hyphomicrobiaceae                                     |
| <i>Burkholderia</i>            | Tb    | Bacteria   Proteobacteria   Betaproteobacteria   Burkholderiales   Burkholderiaceae   Burkholderia                    |
| TM7                            | Tb    | Bacteria   TM7                                                                                                        |
| <i>iii1 8</i>                  | Tp    | Bacteria   Acidobacteria   iii1 8                                                                                     |
| <i>DS 18</i>                   | Tp    | Bacteria   Acidobacteria   iii1 8   DS 18                                                                             |
| <i>Sporichthyaceae</i>         | Tp    | Bacteria   Actinobacteria   Actinobacteria   Actinomycetales   Sporichthyaceae                                        |
| <i>Ktedonobacteria</i>         | Tp    | Bacteria   Chloroflexi   Ktedonobacteria                                                                              |
| <i>Thermogemmatissporales</i>  | Tp    | Bacteria   Chloroflexi   Ktedonobacteria   Thermogemmatissporales                                                     |
| <i>Thermogemmatissporaceae</i> | Tp    | Bacteria   Chloroflexi   Ktedonobacteria   Thermogemmatissporales   Thermogemmatissporaceae                           |
| <i>Phenylobacterium</i>        | Tp    | Bacteria   Proteobacteria   Alphaproteobacteria   Caulobacterales   Caulobacteraceae   Phenylobacterium               |
| <i>Sphingomonadales</i>        | Tp    | Bacteria   Proteobacteria   Alphaproteobacteria   Sphingomonadales                                                    |
| <i>Sphingomonadaceae</i>       | Tp    | Bacteria   Proteobacteria   Alphaproteobacteria   Sphingomonadales   Sphingomonadaceae                                |
| <i>Novosphingobium</i>         | Tp    | Bacteria   Proteobacteria   Alphaproteobacteria   Sphingomonadales   Sphingomonadaceae   Novosphingobium              |
| <i>capsulatum</i>              | Tp    | Bacteria   Proteobacteria   Alphaproteobacteria   Sphingomonadales   Sphingomonadaceae   Novosphingobium   capsulatum |
| <i>Alcaligenaceae</i>          | Tp    | Bacteria   Proteobacteria   Betaproteobacteria   Burkholderiales   Alcaligenaceae                                     |
| <i>Intrasporangiaceae</i>      | Tu    | Bacteria   Actinobacteria   Actinobacteria   Actinomycetales   Intrasporangiaceae                                     |
| <i>Micrococcaceae</i>          | Tu    | Bacteria   Actinobacteria   Actinobacteria   Actinomycetales   Micrococcaceae                                         |
| <i>Rhodococcus</i>             | Tu    | Bacteria   Actinobacteria   Actinobacteria   Actinomycetales   Nocardiaceae   Rhodococcus                             |
| <i>Nocardioideaceae</i>        | Tu    | Bacteria   Actinobacteria   Actinobacteria   Actinomycetales   Nocardioideaceae                                       |

|                         |    |                                                                             |
|-------------------------|----|-----------------------------------------------------------------------------|
| <i>MB A2 108</i>        | Tu | Bacteria Actinobacteria MB A2 108                                           |
| <i>0319 7L14</i>        | Tu | Bacteria Actinobacteria MB A2 108 0319 7L14                                 |
| <i>Ellin329</i>         | Tu | Bacteria Proteobacteria Alphaproteobacteria Ellin329                        |
| <i>Burkholderiaceae</i> | Tu | Bacteria Proteobacteria Betaproteobacteria Burkholderiales Burkholderiaceae |

<sup>†</sup> Column labelled “Habitat” represents the petroleum contaminated environment in which the corresponding taxa (as presented in column labelled “Differentially abundant Taxa”), was found to be significantly differentially abundant by LEfSe using the one class, non-strict test (Please refer to Materials and methods, and Supplementary Table S2 for details). Acronyms represent the following habitats: A: Arctic, C: China oil refineries, I: India oil refineries, M: Mangrove, DWH: Marine sediments, OSC: Oil sands core, OSTPu: Oil sands tailings pond upper, OSTPm: Oil sands tailings pond median, OSTPd: Oil sands tailings pond deep, Tb: Taiga bottom active layer, Tu: Taiga upper active layer, Tp: Taiga permafrost layer.

<sup>‡</sup> Taxonomy is described using the following hierarchy: Kingdom|Phylum|Class|Order|Family|Genus|species.

Supplementary data. Table S6. Summary table showing differentially abundant KEGG Modules identified by LEfSe. (Rows with biomarkers mentioned in the text are filled in blue).

| Differentially abundant KEGG Modules                                                   | Habitat <sup>†</sup> | KEGG Module Hierarchy <sup>‡</sup>                                                                                                                                         |
|----------------------------------------------------------------------------------------|----------------------|----------------------------------------------------------------------------------------------------------------------------------------------------------------------------|
| M00006: Pentose phosphate pathway, oxidative phase, glucose 6P => ribulose 5P          | A                    | Pathway module Carbohydrate and lipid metabolism Central carbohydrate metabolism Pentose phosphate pathway, oxidative phase, glucose 6P => ribulose 5P M00006              |
| M00050: Guanine ribonucleotide biosynthesis IMP => GDP,GTP                             | A                    | Pathway module Nucleotide and amino acid metabolism Purine metabolism Guanine ribonucleotide biosynthesis IMP => GDP,GTP M00050                                            |
| M00086: beta-Oxidation, acyl-CoA synthesis                                             | A                    | Pathway module Carbohydrate and lipid metabolism Fatty acid metabolism beta-Oxidation, acyl-CoA synthesis M00086                                                           |
| M00201: alpha-Glucoside transport system                                               | A                    | Structural complex Environmental information processing Saccharide, polyol, and lipid transport system alpha-Glucoside transport system M00201                             |
| M00206: Cellobiose transport system                                                    | A                    | Structural complex Environmental information processing Saccharide, polyol, and lipid transport system Cellobiose transport system M00206                                  |
| M00207: Putative multiple sugar transport system                                       | A                    | Structural complex Environmental information processing Saccharide, polyol, and lipid transport system Putative multiple sugar transport system M00207                     |
| M00209: Osmoprotectant transport system                                                | A                    | Structural complex Environmental information processing Mineral and organic ion transport system Osmoprotectant transport system M00209                                    |
| M00216: Multiple sugar transport system                                                | A                    | Structural complex Environmental information processing Saccharide, polyol, and lipid transport system Multiple sugar transport system M00216                              |
| M00221: Putative simple sugar transport system                                         | A                    | Structural complex Environmental information processing Saccharide, polyol, and lipid transport system Putative simple sugar transport system M00221                       |
| M00227: Glutamine transport system                                                     | A                    | Structural complex Environmental information processing Phosphate and amino acid transport system Glutamine transport system M00227                                        |
| M00233: Glutamate transport system                                                     | A                    | Structural complex Environmental information processing Phosphate and amino acid transport system Glutamate transport system M00233                                        |
| M00240: Iron complex transport system                                                  | A                    | Structural complex Environmental information processing Metallic cation, iron-siderophore and vitamin B12 transport system Iron complex transport system M00240            |
| M00244: Putative zinc/manganese transport system                                       | A                    | Structural complex Environmental information processing Metallic cation, iron-siderophore and vitamin B12 transport system Putative zinc/manganese transport system M00244 |
| M00271: PTS system, beta-glucosides-specific II component                              | A                    | Structural complex Environmental information processing Phosphotransferase system (PTS) PTS system, beta-glucosides-specific II component M00271                           |
| M00274: PTS system, mannitol-specific II component                                     | A                    | Structural complex Environmental information processing Phosphotransferase system (PTS) PTS system, mannitol-specific II component M00274                                  |
| M00290: Holo-TFIIH complex                                                             | A                    | Structural complex Genetic information processing Repair system Holo-TFIIH complex M00290                                                                                  |
| M00358: Coenzyme M biosynthesis                                                        | A                    | Pathway module Energy metabolism Methane metabolism Coenzyme M biosynthesis M00358                                                                                         |
| M00361: Nucleotide sugar biosynthesis, eukaryotes                                      | A                    | Functional set Metabolism Nucleotide sugar Nucleotide sugar biosynthesis, eukaryotes M00361                                                                                |
| M00362: Nucleotide sugar biosynthesis, prokaryotes                                     | A                    | Functional set Metabolism Nucleotide sugar Nucleotide sugar biosynthesis, prokaryotes M00362                                                                               |
| M00443: SenX3-RegX3 (phosphate starvation response) two-component regulatory system    | A                    | Functional set Environmental information processing Two-component regulatory system SenX3-RegX3 (phosphate starvation response) two-component regulatory system M00443     |
| M00479: DesK-DesR (membrane lipid fluidity regulation) two-component regulatory system | A                    | Functional set Environmental information processing Two-component regulatory system DesK-DesR (membrane lipid fluidity regulation) two-component regulatory system M00479  |
| M00581: Biotin transport system                                                        | A                    | Structural complex Environmental information processing Metallic cation, iron-siderophore and vitamin B12 transport system Biotin transport system M00581                  |
| M00582: Energy-coupling factor transport system                                        | A                    | Structural complex Environmental information processing Metallic cation, iron-siderophore and vitamin B12 transport system Energy-coupling factor transport system M00582  |

|                                                                                             |   |                                                                                                                                                                                |
|---------------------------------------------------------------------------------------------|---|--------------------------------------------------------------------------------------------------------------------------------------------------------------------------------|
| M00609: Cysteine biosynthesis, methionine => cysteine                                       | A | Pathway module Nucleotide and amino acid metabolism Cysteine and methionine metabolism Cysteine biosynthesis, methionine => cysteine M00609                                    |
| M00617: Methanogen                                                                          | A | Signature module Gene set Metabolic capacity Methanogen M00617                                                                                                                 |
| M00632: Galactose degradation, Leloir pathway, galactose => alpha-D-glucose-1P              | A | Pathway module Carbohydrate and lipid metabolism Other carbohydrate metabolism Galactose degradation, Leloir pathway, galactose => alpha-D-glucose-1P M00632                   |
| M00651: Vancomycin resistance, D-Ala-D-Lac type                                             | A | Signature module Gene set Drug resistance Vancomycin resistance, D-Ala-D-Lac type M00651                                                                                       |
| M00658: VanS-VanR (actinomycete type vancomycin resistance) two-component regulatory system | A | Functional set Environmental information processing Two-component regulatory system VanS-VanR (actinomycete type vancomycin resistance) two-component regulatory system M00658 |
| M00713: Fluoroquinolone resistance, efflux pump LfrA                                        | A | Functional set Environmental information processing Drug efflux transporter/pump Fluoroquinolone resistance, efflux pump LfrA M00713                                           |
| M00714: Multidrug resistance, efflux pump QacA                                              | A | Signature module Gene set Drug resistance Multidrug resistance, efflux pump QacA M00714                                                                                        |
| M00715: Lincosamide resistance, efflux pump LmrB                                            | A | Functional set Environmental information processing Drug efflux transporter/pump Lincosamide resistance, efflux pump LmrB M00715                                               |
| M00005: PRPP biosynthesis, ribose 5P => PRPP                                                | C | Pathway module Carbohydrate and lipid metabolism Central carbohydrate metabolism PRPP biosynthesis, ribose 5P => PRPP M00005                                                   |
| M00014: Glucuronate pathway (uronate pathway)                                               | C | Pathway module Carbohydrate and lipid metabolism Other carbohydrate metabolism Glucuronate pathway (uronate pathway) M00014                                                    |
| M00031: Lysine biosynthesis, mediated by LysW, 2-aminoadipate => lysine                     | C | Pathway module Nucleotide and amino acid metabolism Lysine metabolism Lysine biosynthesis, mediated by LysW, 2-aminoadipate => lysine M00031                                   |
| M00076: Dermatan sulfate degradation                                                        | C | Pathway module Carbohydrate and lipid metabolism Glycosaminoglycan metabolism Dermatan sulfate degradation M00076                                                              |
| M00089: Triacylglycerol biosynthesis                                                        | C | Pathway module Carbohydrate and lipid metabolism Lipid metabolism Triacylglycerol biosynthesis M00089                                                                          |
| M00112: Tocopherol biosynthesis                                                             | C | Pathway module Nucleotide and amino acid metabolism Cofactor and vitamin biosynthesis Tocopherol biosynthesis M00112                                                           |
| M00116: Menaquinone biosynthesis, chorismate => menaquinone                                 | C | Pathway module Nucleotide and amino acid metabolism Cofactor and vitamin biosynthesis Menaquinone biosynthesis, chorismate => menaquinone M00116                               |
| M00145: NAD(P)H:quinone oxidoreductase, chloroplasts and cyanobacteria                      | C | Structural complex Energy metabolism ATP synthesis NAD(P)H:quinone oxidoreductase, chloroplasts and cyanobacteria M00145                                                       |
| M00161: Photosystem II                                                                      | C | Structural complex Energy metabolism Photosynthesis Photosystem II M00161                                                                                                      |
| M00162: Cytochrome b6f complex                                                              | C | Structural complex Energy metabolism ATP synthesis Cytochrome b6f complex M00162                                                                                               |
| M00163: Photosystem I                                                                       | C | Structural complex Energy metabolism Photosynthesis Photosystem I M00163                                                                                                       |
| M00196: Multiple sugar transport system                                                     | C | Structural complex Environmental information processing Saccharide, polyol, and lipid transport system Multiple sugar transport system M00196                                  |
| M00197: Putative fructooligosaccharide transport system                                     | C | Structural complex Environmental information processing Saccharide, polyol, and lipid transport system Putative fructooligosaccharide transport system M00197                  |
| M00212: Ribose transport system                                                             | C | Structural complex Environmental information processing Saccharide, polyol, and lipid transport system Ribose transport system M00212                                          |
| M00220: Rhamnose transport system                                                           | C | Structural complex Environmental information processing Saccharide, polyol, and lipid transport system Rhamnose transport system M00220                                        |
| M00239: Peptides/nickel transport system                                                    | C | Structural complex Environmental information processing Peptide and nickel transport system Peptides/nickel transport system M00239                                            |
| M00243: Manganese/iron transport system                                                     | C | Structural complex Environmental information processing Metallic cation, iron-siderophore and vitamin B12 transport system Manganese/iron transport system M00243              |
| M00253: Sodium transport system                                                             | C | Structural complex Environmental information processing ABC-2 type and other transport systems Sodium transport system M00253                                                  |
| M00254: ABC-2 type transport system                                                         | C | Structural complex Environmental information processing ABC-2 type and other transport systems ABC-2 type transport system M00254                                              |
| M00319: Manganese/zinc/iron transport system                                                | C | Structural complex Environmental information processing Metallic cation, iron-siderophore and vitamin B12 transport system Manganese/zinc/iron transport system M00319         |
| M00322: Neutral amino acid transport system                                                 | C | Structural complex Environmental information processing Phosphate and amino acid transport system Neutral amino acid transport system M00322                                   |
| M00336: Twin-arginine translocation (Tat) system                                            | C | Structural complex Environmental information processing Bacterial secretion system Twin-arginine translocation (Tat) system M00336                                             |
| M00342: Bacterial proteasome                                                                | C | Structural complex Genetic information processing Proteasome Bacterial proteasome M00342                                                                                       |

|                                                                                                                        |     |                                                                                                                                                                                           |
|------------------------------------------------------------------------------------------------------------------------|-----|-------------------------------------------------------------------------------------------------------------------------------------------------------------------------------------------|
| M00343: Archaeal proteasome                                                                                            | C   | Structural complex Genetic information processing Proteasome Archaeal proteasome M00343                                                                                                   |
| M00378: F420 biosynthesis                                                                                              | C   | Pathway module Energy metabolism Methane metabolism F420 biosynthesis M00378                                                                                                              |
| M00439: Oligopeptide transport system                                                                                  | C   | Structural complex Environmental information processing Peptide and nickel transport system Oligopeptide transport system M00439                                                          |
| M00459: VicK-VicR (cell wall metabolism) two-component regulatory system                                               | C   | Functional set Environmental information processing Two-component regulatory system VicK-VicR (cell wall metabolism) two-component regulatory system M00459                               |
| M00460: MprB-MprA (maintenance of persistent infection) two-component regulatory system                                | C   | Functional set Environmental information processing Two-component regulatory system MprB-MprA (maintenance of persistent infection) two-component regulatory system M00460                |
| M00461: MtrB-MtrA (osmotic stress response) two-component regulatory system                                            | C   | Functional set Environmental information processing Two-component regulatory system MtrB-MtrA (osmotic stress response) two-component regulatory system M00461                            |
| M00462: PrrB-PrrA (intracellular multiplication) two-component regulatory system                                       | C   | Functional set Environmental information processing Two-component regulatory system PrrB-PrrA (intracellular multiplication) two-component regulatory system M00462                       |
| M00466: NblS-NblR (photosynthesis) two-component regulatory system                                                     | C   | Functional set Environmental information processing Two-component regulatory system NblS-NblR (photosynthesis) two-component regulatory system M00466                                     |
| M00467: SasA-RpaAB (circadian timing mediating) two-component regulatory system                                        | C   | Functional set Environmental information processing Two-component regulatory system SasA-RpaAB (circadian timing mediating) two-component regulatory system M00467                        |
| M00478: DegS-DegU (multicellular behavior control) two-component regulatory system                                     | C   | Functional set Environmental information processing Two-component regulatory system DegS-DegU (multicellular behavior control) two-component regulatory system M00478                     |
| M00483: NreB-NreC (dissimilatory nitrate/nitrite reduction) two-component regulatory system                            | C   | Functional set Environmental information processing Two-component regulatory system NreB-NreC (dissimilatory nitrate/nitrite reduction) two-component regulatory system M00483            |
| M00500: AtoS-AtoC (cPHB biosynthesis) two-component regulatory system                                                  | C   | Functional set Environmental information processing Two-component regulatory system AtoS-AtoC (cPHB biosynthesis) two-component regulatory system M00500                                  |
| M00509: WspE-WspRF (chemosensory) two-component regulatory system                                                      | C   | Functional set Environmental information processing Two-component regulatory system WspE-WspRF (chemosensory) two-component regulatory system M00509                                      |
| M00549: Nucleotide sugar biosynthesis, glucose => UDP-glucose                                                          | C   | Pathway module Carbohydrate and lipid metabolism Other carbohydrate metabolism Nucleotide sugar biosynthesis, glucose => UDP-glucose M00549                                               |
| M00601: Putative chitobiose transport system                                                                           | C   | Structural complex Environmental information processing Saccharide, polyol, and lipid transport system Putative chitobiose transport system M00601                                        |
| M00633: Semi-phosphorylative Entner-Doudoroff pathway, gluconate/galactonate => glycerate-3P                           | C   | Pathway module Carbohydrate and lipid metabolism Central carbohydrate metabolism Semi-phosphorylative Entner-Doudoroff pathway, gluconate/galactonate => glycerate-3P M00633              |
| M00695: cAMP signaling                                                                                                 | C   | Functional set Cellular processes Cell signaling cAMP signaling M00695                                                                                                                    |
| M00725: Cationic antimicrobial peptide (CAMP) resistance, dltABCD operon                                               | C   | Signature module Gene set Drug resistance Cationic antimicrobial peptide (CAMP) resistance, dltABCD operon M00725                                                                         |
| M00728: Cationic antimicrobial peptide (CAMP) resistance, envelope protein folding and degrading factors DegP and DsbA | C   | Functional set Environmental information processing Drug resistance Cationic antimicrobial peptide (CAMP) resistance, envelope protein folding and degrading factors DegP and DsbA M00728 |
| M00763: Ornithine biosynthesis, mediated by LysW, glutamate => ornithine                                               | C   | Pathway module Nucleotide and amino acid metabolism Arginine and proline metabolism Ornithine biosynthesis, mediated by LysW, glutamate => ornithine M00763                               |
| M00767: Multidrug resistance, efflux pump OqxAB                                                                        | C   | Functional set Environmental information processing Drug efflux transporter/pump Multidrug resistance, efflux pump OqxAB M00767                                                           |
| M00028: Ornithine biosynthesis, glutamate => ornithine                                                                 | DWH | Pathway module Nucleotide and amino acid metabolism Arginine and proline metabolism Ornithine biosynthesis, glutamate => ornithine M00028                                                 |
| M00030: Lysine biosynthesis, AAA pathway, 2-oxoglutarate => 2-aminoadipate => lysine                                   | DWH | Pathway module Nucleotide and amino acid metabolism Lysine metabolism Lysine biosynthesis, AAA pathway, 2-oxoglutarate => 2-aminoadipate => lysine M00030                                 |
| M00060: Lipopolysaccharide biosynthesis, KDO2-lipid A                                                                  | DWH | Pathway module Carbohydrate and lipid metabolism Lipopolysaccharide metabolism Lipopolysaccharide biosynthesis, KDO2-lipid A M00060                                                       |
| M00123: Biotin biosynthesis, pimeloyl-ACP/CoA => biotin                                                                | DWH | Pathway module Nucleotide and amino acid metabolism Cofactor and vitamin biosynthesis Biotin biosynthesis, pimeloyl-ACP/CoA => biotin M00123                                              |

|                                                                                            |     |                                                                                                                                                                                     |
|--------------------------------------------------------------------------------------------|-----|-------------------------------------------------------------------------------------------------------------------------------------------------------------------------------------|
| M00136: GABA biosynthesis, prokaryotes, putrescine => GABA                                 | DWH | Pathway module   Nucleotide and amino acid metabolism   Polyamine biosynthesis   GABA biosynthesis, prokaryotes, putrescine => GABA M00136                                          |
| M00140: C1-unit interconversion, prokaryotes                                               | DWH | Pathway module   Nucleotide and amino acid metabolism   Cofactor and vitamin biosynthesis   C1-unit interconversion, prokaryotes M00140                                             |
| M00193: Putative spermidine/putrescine transport system                                    | DWH | Structural complex   Environmental information processing   Mineral and organic ion transport system   Putative spermidine/putrescine transport system M00193                       |
| M00194: Maltose/maltodextrin transport system                                              | DWH | Structural complex   Environmental information processing   Saccharide, polyol, and lipid transport system   Maltose/maltodextrin transport system M00194                           |
| M00200: Putative sorbitol/mannitol transport system                                        | DWH | Structural complex   Environmental information processing   Saccharide, polyol, and lipid transport system   Putative sorbitol/mannitol transport system M00200                     |
| M00208: Glycine betaine/proline transport system                                           | DWH | Structural complex   Environmental information processing   Mineral and organic ion transport system   Glycine betaine/proline transport system M00208                              |
| M00232: General L-amino acid transport system                                              | DWH | Structural complex   Environmental information processing   Phosphate and amino acid transport system   General L-amino acid transport system M00232                                |
| M00235: Arginine/ornithine transport system                                                | DWH | Structural complex   Environmental information processing   Phosphate and amino acid transport system   Arginine/ornithine transport system M00235                                  |
| M00236: Putative polar amino acid transport system                                         | DWH | Structural complex   Environmental information processing   Phosphate and amino acid transport system   Putative polar amino acid transport system M00236                           |
| M00250: Lipopolysaccharide transport system                                                | DWH | Structural complex   Environmental information processing   ABC-2 type and other transport systems   Lipopolysaccharide transport system M00250                                     |
| M00299: Spermidine/putrescine transport system                                             | DWH | Structural complex   Environmental information processing   Mineral and organic ion transport system   Spermidine/putrescine transport system M00299                                |
| M00300: Putrescine transport system                                                        | DWH | Structural complex   Environmental information processing   Mineral and organic ion transport system   Putrescine transport system M00300                                           |
| M00308: Semi-phosphorylative Entner-Doudoroff pathway, gluconate => glycerate-3P           | DWH | Pathway module   Carbohydrate and lipid metabolism   Central carbohydrate metabolism   Semi-phosphorylative Entner-Doudoroff pathway, gluconate => glycerate-3P M00308              |
| M00323: Urea transport system                                                              | DWH | Structural complex   Environmental information processing   Phosphate and amino acid transport system   Urea transport system M00323                                                |
| M00334: Type VI secretion system                                                           | DWH | Structural complex   Environmental information processing   Bacterial secretion system   Type VI secretion system M00334                                                            |
| M00377: Reductive acetyl-CoA pathway (Wood-Ljungdahl pathway)                              | DWH | Pathway module   Energy metabolism   Carbon fixation   Reductive acetyl-CoA pathway (Wood-Ljungdahl pathway) M00377                                                                 |
| M00442: Putative hydroxymethylpyrimidine transport system                                  | DWH | Structural complex   Environmental information processing   Mineral and organic ion transport system   Putative hydroxymethylpyrimidine transport system M00442                     |
| M00491: arabinogalactan oligomer/maltooligosaccharide transport system                     | DWH | Structural complex   Environmental information processing   Saccharide, polyol, and lipid transport system   arabinogalactan oligomer/maltooligosaccharide transport system M00491  |
| M00505: KinB-AlgB (alginate production) two-component regulatory system                    | DWH | Functional set   Environmental information processing   Two-component regulatory system   KinB-AlgB (alginate production) two-component regulatory system M00505                    |
| M00517: RpfC-RpfG (cell-to-cell signaling) two-component regulatory system                 | DWH | Functional set   Environmental information processing   Two-component regulatory system   RpfC-RpfG (cell-to-cell signaling) two-component regulatory system M00517                 |
| M00552: D-galactonate degradation, De Ley-Doudoroff pathway, D-galactonate => glycerate-3P | DWH | Pathway module   Carbohydrate and lipid metabolism   Other carbohydrate metabolism   D-galactonate degradation, De Ley-Doudoroff pathway, D-galactonate => glycerate-3P M00552      |
| M00573: Biotin biosynthesis, BioI pathway, long-chain-acyl-ACP => pimeloyl-ACP => biotin   | DWH | Pathway module   Nucleotide and amino acid metabolism   Cofactor and vitamin biosynthesis   Biotin biosynthesis, BioI pathway, long-chain-acyl-ACP => pimeloyl-ACP => biotin M00573 |
| M00577: Biotin biosynthesis, BioW pathway, pimelate => pimeloyl-CoA => biotin              | DWH | Pathway module   Nucleotide and amino acid metabolism   Cofactor and vitamin biosynthesis   Biotin biosynthesis, BioW pathway, pimelate => pimeloyl-CoA => biotin M00577            |
| M00602: Arabinosaccharide transport system                                                 | DWH | Structural complex   Environmental information processing   Saccharide, polyol, and lipid transport system   Arabinosaccharide transport system M00602                              |
| M00605: Glucose/mannose transport system                                                   | DWH | Structural complex   Environmental information processing   Saccharide, polyol, and lipid transport system   Glucose/mannose transport system M00605                                |
| M00623: Phthalate degradation, phthalate => protocatechuate                                | DWH | Pathway module   Secondary metabolism   Aromatics degradation   Phthalate degradation, phthalate => protocatechuate M00623                                                          |
| M00637: Anthranilate degradation, anthranilate => catechol                                 | DWH | Pathway module   Secondary metabolism   Aromatics degradation   Anthranilate degradation, anthranilate => catechol M00637                                                           |
| M00641: Multidrug resistance, efflux pump MexEF-OprN                                       | DWH | Signature module   Gene set   Drug resistance   Multidrug resistance, efflux pump MexEF-OprN M00641                                                                                 |

|                                                                                                |     |                                                                                                                                                                           |
|------------------------------------------------------------------------------------------------|-----|---------------------------------------------------------------------------------------------------------------------------------------------------------------------------|
| M00699: Multidrug resistance, efflux pump AmeABC                                               | DWH | Functional set Environmental information processing Drug efflux transporter/pump Multidrug resistance, efflux pump AmeABC M00699                                          |
| M00718: Multidrug resistance, efflux pump MexAB-OprM                                           | DWH | Signature module Gene set Drug resistance Multidrug resistance, efflux pump MexAB-OprM M00718                                                                             |
| M00721: Cationic antimicrobial peptide (CAMP) resistance, arnBCADTEF operon                    | DWH | Functional set Environmental information processing Drug resistance Cationic antimicrobial peptide (CAMP) resistance, arnBCADTEF operon M00721                            |
| M00723: Cationic antimicrobial peptide (CAMP) resistance, phosphoethanolamine transferase EptB | DWH | Functional set Environmental information processing Drug resistance Cationic antimicrobial peptide (CAMP) resistance, phosphoethanolamine transferase EptB M00723         |
| M00724: Cationic antimicrobial peptide (CAMP) resistance, palmitoyl transferase PagP           | DWH | Functional set Environmental information processing Drug resistance Cationic antimicrobial peptide (CAMP) resistance, palmitoyl transferase PagP M00724                   |
| M00742: Aminoglycoside resistance, protease FtsH                                               | DWH | Functional set Environmental information processing Drug resistance Aminoglycoside resistance, protease FtsH M00742                                                       |
| M00744: Cationic antimicrobial peptide (CAMP) resistance, protease PgtE                        | DWH | Signature module Gene set Drug resistance Cationic antimicrobial peptide (CAMP) resistance, protease PgtE M00744                                                          |
| M00042: Catecholamine biosynthesis, tyrosine => dopamine => noradrenaline => adrenaline        | I   | Pathway module Nucleotide and amino acid metabolism Aromatic amino acid metabolism Catecholamine biosynthesis, tyrosine => dopamine => noradrenaline => adrenaline M00042 |
| M00063: CMP-KDO biosynthesis                                                                   | I   | Pathway module Carbohydrate and lipid metabolism Lipopolysaccharide metabolism CMP-KDO biosynthesis M00063                                                                |
| M00064: ADP-L-glycero-D-manno-heptose biosynthesis                                             | I   | Pathway module Carbohydrate and lipid metabolism Lipopolysaccharide metabolism ADP-L-glycero-D-manno-heptose biosynthesis M00064                                          |
| M00066: Lactosylceramide biosynthesis                                                          | I   | Pathway module Carbohydrate and lipid metabolism Lipid metabolism Lactosylceramide biosynthesis M00066                                                                    |
| M00144: NADH:quinone oxidoreductase, prokaryotes                                               | I   | Structural complex Energy metabolism ATP synthesis NADH:quinone oxidoreductase, prokaryotes M00144                                                                        |
| M00155: Cytochrome c oxidase, prokaryotes                                                      | I   | Structural complex Energy metabolism ATP synthesis Cytochrome c oxidase, prokaryotes M00155                                                                               |
| M00156: Cytochrome c oxidase, cbb3-type                                                        | I   | Structural complex Energy metabolism ATP synthesis Cytochrome c oxidase, cbb3-type M00156                                                                                 |
| M00166: Reductive pentose phosphate cycle, ribulose-5P => glyceraldehyde-3P                    | I   | Pathway module Energy metabolism Carbon fixation Reductive pentose phosphate cycle, ribulose-5P => glyceraldehyde-3P M00166                                               |
| M00210: Phospholipid transport system                                                          | I   | Structural complex Environmental information processing Saccharide, polyol, and lipid transport system Phospholipid transport system M00210                               |
| M00211: Putative ABC transport system                                                          | I   | Structural complex Environmental information processing Saccharide, polyol, and lipid transport system Putative ABC transport system M00211                               |
| M00258: Putative ABC transport system                                                          | I   | Structural complex Environmental information processing ABC-2 type and other transport systems Putative ABC transport system M00258                                       |
| M00339: RaxAB-RaxC type I secretion system                                                     | I   | Structural complex Environmental information processing Bacterial secretion system RaxAB-RaxC type I secretion system M00339                                              |
| M00346: Formaldehyde assimilation, serine pathway                                              | I   | Pathway module Energy metabolism Methane metabolism Formaldehyde assimilation, serine pathway M00346                                                                      |
| M00444: PhoQ-PhoP (magnesium transport) two-component regulatory system                        | I   | Functional set Environmental information processing Two-component regulatory system PhoQ-PhoP (magnesium transport) two-component regulatory system M00444                |
| M00447: CpxA-CpxR (envelope stress response) two-component regulatory system                   | I   | Functional set Environmental information processing Two-component regulatory system CpxA-CpxR (envelope stress response) two-component regulatory system M00447           |
| M00471: NarX-NarL (nitrate respiration) two-component regulatory system                        | I   | Functional set Environmental information processing Two-component regulatory system NarX-NarL (nitrate respiration) two-component regulatory system M00471                |
| M00473: UhpB-UhpA (hexose phosphates uptake) two-component regulatory system                   | I   | Functional set Environmental information processing Two-component regulatory system UhpB-UhpA (hexose phosphates uptake) two-component regulatory system M00473           |
| M00492: LytS-LytR two-component regulatory system                                              | I   | Functional set Environmental information processing Two-component regulatory system LytS-LytR two-component regulatory system M00492                                      |
| M00532: Photorespiration                                                                       | I   | Pathway module Carbohydrate and lipid metabolism Other carbohydrate metabolism Photorespiration M00532                                                                    |
| M00550: Ascorbate degradation, ascorbate => D-xylulose-5P                                      | I   | Pathway module Nucleotide and amino acid metabolism Cofactor and vitamin biosynthesis Ascorbate degradation, ascorbate => D-xylulose-5P M00550                            |
| M00571: AlgE-type Mannuronan C-5-Epimerase transport system                                    | I   | Structural complex Environmental information processing Bacterial secretion system AlgE-type Mannuronan C-5-Epimerase transport system M00571                             |

|                                                                                                            |   |                                                                                                                                                                               |
|------------------------------------------------------------------------------------------------------------|---|-------------------------------------------------------------------------------------------------------------------------------------------------------------------------------|
| M00596: Dissimilatory sulfate reduction, sulfate => H2S                                                    | I | Pathway module Energy metabolism Sulfur metabolism Dissimilatory sulfate reduction, sulfate => H2S M00596                                                                     |
| M00720: Multidrug resistance, efflux pump VexEF-ToIC                                                       | I | Structural complex Environmental information processing Drug efflux transporter/pump Multidrug resistance, efflux pump VexEF-ToIC M00720                                      |
| M00727: Cationic antimicrobial peptide (CAMP) resistance, N-acetylmuramoyl-L-alanine amidase AmiA and AmiC | I | Functional set Environmental information processing Drug resistance Cationic antimicrobial peptide (CAMP) resistance, N-acetylmuramoyl-L-alanine amidase AmiA and AmiC M00727 |
| M00740: Methylaspartate cycle                                                                              | I | Pathway module Carbohydrate and lipid metabolism Other carbohydrate metabolism Methylaspartate cycle M00740                                                                   |
| M00771: FitF-FitH (insecticidal toxin regulation) two-component regulatory system                          | I | Functional set Environmental information processing Two-component regulatory system FitF-FitH (insecticidal toxin regulation) two-component regulatory system M00771          |
| M00001: Glycolysis (Embden-Meyerhof pathway), glucose => pyruvate                                          | M | Pathway module Carbohydrate and lipid metabolism Central carbohydrate metabolism Glycolysis (Embden-Meyerhof pathway), glucose => pyruvate M00001                             |
| M00002: Glycolysis, core module involving three-carbon compounds                                           | M | Pathway module Carbohydrate and lipid metabolism Central carbohydrate metabolism Glycolysis, core module involving three-carbon compounds M00002                              |
| M00004: Pentose phosphate pathway (Pentose phosphate cycle)                                                | M | Pathway module Carbohydrate and lipid metabolism Central carbohydrate metabolism Pentose phosphate pathway (Pentose phosphate cycle) M00004                                   |
| M00009: Citrate cycle (TCA cycle, Krebs cycle)                                                             | M | Pathway module Carbohydrate and lipid metabolism Central carbohydrate metabolism Citrate cycle (TCA cycle, Krebs cycle) M00009                                                |
| M00011: Citrate cycle, second carbon oxidation, 2-oxoglutarate => oxaloacetate                             | M | Pathway module Carbohydrate and lipid metabolism Central carbohydrate metabolism Citrate cycle, second carbon oxidation, 2-oxoglutarate => oxaloacetate M00011                |
| M00022: Shikimate pathway, phosphoenolpyruvate + erythrose-4P => chorismate                                | M | Pathway module Nucleotide and amino acid metabolism Aromatic amino acid metabolism Shikimate pathway, phosphoenolpyruvate + erythrose-4P => chorismate M00022                 |
| M00023: Tryptophan biosynthesis, chorismate => tryptophan                                                  | M | Pathway module Nucleotide and amino acid metabolism Aromatic amino acid metabolism Tryptophan biosynthesis, chorismate => tryptophan M00023                                   |
| M00035: Methionine degradation                                                                             | M | Pathway module Nucleotide and amino acid metabolism Cysteine and methionine metabolism Methionine degradation M00035                                                          |
| M00051: Uridine monophosphate biosynthesis, glutamine (+ PRPP) => UMP                                      | M | Pathway module Nucleotide and amino acid metabolism Pyrimidine metabolism Uridine monophosphate biosynthesis, glutamine (+ PRPP) => UMP M00051                                |
| M00052: Pyrimidine ribonucleotide biosynthesis, UMP => UDP/UTP,CDP/CTP                                     | M | Pathway module Nucleotide and amino acid metabolism Pyrimidine metabolism Pyrimidine ribonucleotide biosynthesis, UMP => UDP/UTP,CDP/CTP M00052                               |
| M00080: Lipopolysaccharide biosynthesis, inner core => outer core => O-antigen                             | M | Pathway module Carbohydrate and lipid metabolism Lipopolysaccharide metabolism Lipopolysaccharide biosynthesis, inner core => outer core => O-antigen M00080                  |
| M00115: NAD biosynthesis, aspartate => NAD                                                                 | M | Pathway module Nucleotide and amino acid metabolism Cofactor and vitamin biosynthesis NAD biosynthesis, aspartate => NAD M00115                                               |
| M00120: Coenzyme A biosynthesis, pantothenate => CoA                                                       | M | Pathway module Nucleotide and amino acid metabolism Cofactor and vitamin biosynthesis Coenzyme A biosynthesis, pantothenate => CoA M00120                                     |
| M00159: V-type ATPase, prokaryotes                                                                         | M | Structural complex Energy metabolism ATP synthesis V-type ATPase, prokaryotes M00159                                                                                          |
| M00173: Reductive citrate cycle (Arnon-Buchanan cycle)                                                     | M | Pathway module Energy metabolism Carbon fixation Reductive citrate cycle (Arnon-Buchanan cycle) M00173                                                                        |
| M00178: Ribosome, bacteria                                                                                 | M | Structural complex Genetic information processing Ribosome Ribosome, bacteria M00178                                                                                          |
| M00183: RNA polymerase, bacteria                                                                           | M | Structural complex Genetic information processing RNA polymerase RNA polymerase, bacteria M00183                                                                              |
| M00222: Phosphate transport system                                                                         | M | Structural complex Environmental information processing Phosphate and amino acid transport system Phosphate transport system M00222                                           |
| M00242: Zinc transport system                                                                              | M | Structural complex Environmental information processing Metallic cation, iron-siderophore and vitamin B12 transport system Zinc transport system M00242                       |
| M00255: Lipoprotein-releasing system                                                                       | M | Structural complex Environmental information processing ABC-2 type and other transport systems Lipoprotein-releasing system M00255                                            |
| M00256: Cell division transport system                                                                     | M | Structural complex Environmental information processing ABC-2 type and other transport systems Cell division transport system M00256                                          |
| M00260: DNA polymerase III complex, bacteria                                                               | M | Structural complex Genetic information processing DNA polymerase DNA polymerase III complex, bacteria M00260                                                                  |
| M00273: PTS system, fructose-specific II component                                                         | M | Structural complex Environmental information processing Phosphotransferase system (PTS) PTS system, fructose-specific II component M00273                                     |
| M00338: Cysteine biosynthesis, homocysteine + serine => cysteine                                           | M | Pathway module Nucleotide and amino acid metabolism Cysteine and methionine metabolism Cysteine biosynthesis, homocysteine + serine => cysteine M00338                        |
| M00359: Aminoacyl-tRNA biosynthesis, eukaryotes                                                            | M | Functional set Metabolism Aminoacyl tRNA Aminoacyl-tRNA biosynthesis, eukaryotes M00359                                                                                       |
| M00360: Aminoacyl-tRNA biosynthesis, prokaryotes                                                           | M | Functional set Metabolism Aminoacyl tRNA Aminoacyl-tRNA biosynthesis, prokaryotes M00360                                                                                      |

|                                                                                        |     |                                                                                                                                                                      |
|----------------------------------------------------------------------------------------|-----|----------------------------------------------------------------------------------------------------------------------------------------------------------------------|
| M00364: C10-C20 isoprenoid biosynthesis, bacteria                                      | M   | Pathway module Carbohydrate and lipid metabolism Terpenoid backbone biosynthesis C10-C20 isoprenoid biosynthesis, bacteria M00364                                    |
| M00365: C10-C20 isoprenoid biosynthesis, archaea                                       | M   | Pathway module Carbohydrate and lipid metabolism Terpenoid backbone biosynthesis C10-C20 isoprenoid biosynthesis, archaea M00365                                     |
| M00366: C10-C20 isoprenoid biosynthesis, plants                                        | M   | Pathway module Carbohydrate and lipid metabolism Terpenoid backbone biosynthesis C10-C20 isoprenoid biosynthesis, plants M00366                                      |
| M00394: RNA degradosome                                                                | M   | Structural complex Genetic information processing RNA processing RNA degradosome M00394                                                                              |
| M00429: Competence-related DNA transformation transporter                              | M   | Structural complex Environmental information processing Bacterial secretion system Competence-related DNA transformation transporter M00429                          |
| M00434: PhoR-PhoB (phosphate starvation response) two-component regulatory system      | M   | Functional set Environmental information processing Two-component regulatory system PhoR-PhoB (phosphate starvation response) two-component regulatory system M00434 |
| M00499: HydH-HydG (metal tolerance) two-component regulatory system                    | M   | Functional set Environmental information processing Two-component regulatory system HydH-HydG (metal tolerance) two-component regulatory system M00499               |
| M00519: YesM-YesN two-component regulatory system                                      | M   | Functional set Environmental information processing Two-component regulatory system YesM-YesN two-component regulatory system M00519                                 |
| M00565: Trehalose biosynthesis, D-glucose 1P => trehalose                              | M   | Pathway module Carbohydrate and lipid metabolism Other carbohydrate metabolism Trehalose biosynthesis, D-glucose 1P => trehalose M00565                              |
| M00611: Oxygenic photosynthesis in plants and cyanobacteria                            | M   | Signature module Gene set Metabolic capacity Oxygenic photosynthesis in plants and cyanobacteria M00611                                                              |
| M00614: Anoxygenic photosynthesis in green sulfur bacteria                             | M   | Signature module Gene set Metabolic capacity Anoxygenic photosynthesis in green sulfur bacteria M00614                                                               |
| M00618: Acetogen                                                                       | M   | Signature module Gene set Metabolic capacity Acetogen M00618                                                                                                         |
| M00620: Incomplete reductive citrate cycle, acetyl-CoA => oxoglutarate                 | M   | Pathway module Energy metabolism Carbon fixation Incomplete reductive citrate cycle, acetyl-CoA => oxoglutarate M00620                                               |
| M00729: Fluoroquinolone resistance, gyrase-protecting protein Qnr                      | M   | Functional set Environmental information processing Drug resistance Fluoroquinolone resistance, gyrase-protecting protein Qnr M00729                                 |
| M00010: Citrate cycle, first carbon oxidation, oxaloacetate => 2-oxoglutarate          | OSC | Pathway module Carbohydrate and lipid metabolism Central carbohydrate metabolism Citrate cycle, first carbon oxidation, oxaloacetate => 2-oxoglutarate M00010        |
| M00012: Glyoxylate cycle                                                               | OSC | Pathway module Carbohydrate and lipid metabolism Other carbohydrate metabolism Glyoxylate cycle M00012                                                               |
| M00013: Malonate semialdehyde pathway, propanoyl-CoA => acetyl-CoA                     | OSC | Pathway module Carbohydrate and lipid metabolism Other carbohydrate metabolism Malonate semialdehyde pathway, propanoyl-CoA => acetyl-CoA M00013                     |
| M00027: GABA (gamma-Aminobutyrate) shunt                                               | OSC | Pathway module Nucleotide and amino acid metabolism Other amino acid metabolism GABA (gamma-Aminobutyrate) shunt M00027                                              |
| M00036: Leucine degradation, leucine => acetoacetate + acetyl-CoA                      | OSC | Pathway module Nucleotide and amino acid metabolism Branched-chain amino acid metabolism Leucine degradation, leucine => acetoacetate + acetyl-CoA M00036            |
| M00045: Histidine degradation, histidine => N-formiminoglutamate => glutamate          | OSC | Pathway module Nucleotide and amino acid metabolism Histidine metabolism Histidine degradation, histidine => N-formiminoglutamate => glutamate M00045                |
| M00046: Pyrimidine degradation, uracil => beta-alanine, thymine => 3-aminoisobutanoate | OSC | Pathway module Nucleotide and amino acid metabolism Pyrimidine metabolism Pyrimidine degradation, uracil => beta-alanine, thymine => 3-aminoisobutanoate M00046      |
| M00088: Ketone body biosynthesis, acetyl-CoA => acetoacetate/3-hydroxybutyrate/acetone | OSC | Pathway module Carbohydrate and lipid metabolism Fatty acid metabolism Ketone body biosynthesis, acetyl-CoA => acetoacetate/3-hydroxybutyrate/acetone M00088         |
| M00098: Acylglycerol degradation                                                       | OSC | Pathway module Carbohydrate and lipid metabolism Lipid metabolism Acylglycerol degradation M00098                                                                    |
| M00118: Glutathione biosynthesis, glutamate => glutathione                             | OSC | Pathway module Nucleotide and amino acid metabolism Cofactor and vitamin biosynthesis Glutathione biosynthesis, glutamate => glutathione M00118                      |
| M00124: Pyridoxal biosynthesis, erythrose-4P => pyridoxal-5P                           | OSC | Pathway module Nucleotide and amino acid metabolism Cofactor and vitamin biosynthesis Pyridoxal biosynthesis, erythrose-4P => pyridoxal-5P M00124                    |
| M00130: Inositol phosphate metabolism, PI=> PIP2 => Ins(1,4,5)P3 => Ins(1,3,4,5)P4     | OSC | Pathway module Carbohydrate and lipid metabolism Lipid metabolism Inositol phosphate metabolism, PI=> PIP2 => Ins(1,4,5)P3 => Ins(1,3,4,5)P4 M00130                  |
| M00135: GABA biosynthesis, eukaryotes, putrescine => GABA                              | OSC | Pathway module Nucleotide and amino acid metabolism Polyamine biosynthesis GABA biosynthesis, eukaryotes, putrescine => GABA M00135                                  |
| M00185: Sulfate transport system                                                       | OSC | Structural complex Environmental information processing Mineral and organic ion transport system Sulfate transport system M00185                                     |
| M00188: NitT/TauT family transport system                                              | OSC | Structural complex Environmental information processing Mineral and organic ion transport system NitT/TauT family transport system M00188                            |

|                                                                                       |     |                                                                                                                                                                         |
|---------------------------------------------------------------------------------------|-----|-------------------------------------------------------------------------------------------------------------------------------------------------------------------------|
| M00190: Iron(III) transport system                                                    | OSC | Structural complex Environmental information processing Mineral and organic ion transport system Iron(III) transport system M00190                                      |
| M00191: Thiamine transport system                                                     | OSC | Structural complex Environmental information processing Mineral and organic ion transport system Thiamine transport system M00191                                       |
| M00204: Trehalose/maltose transport system                                            | OSC | Structural complex Environmental information processing Saccharide, polyol, and lipid transport system Trehalose/maltose transport system M00204                        |
| M00215: D-Xylose transport system                                                     | OSC | Structural complex Environmental information processing Saccharide, polyol, and lipid transport system D-Xylose transport system M00215                                 |
| M00230: Glutamate/aspartate transport system                                          | OSC | Structural complex Environmental information processing Phosphate and amino acid transport system Glutamate/aspartate transport system M00230                           |
| M00234: Cystine transport system                                                      | OSC | Structural complex Environmental information processing Phosphate and amino acid transport system Cystine transport system M00234                                       |
| M00238: D-Methionine transport system                                                 | OSC | Structural complex Environmental information processing Phosphate and amino acid transport system D-Methionine transport system M00238                                  |
| M00247: Putative ABC transport system                                                 | OSC | Structural complex Environmental information processing Metallic cation, iron-siderophore and vitamin B12 transport system Putative ABC transport system M00247         |
| M00269: PTS system, sucrose-specific II component                                     | OSC | Structural complex Environmental information processing Phosphotransferase system (PTS) PTS system, sucrose-specific II component M00269                                |
| M00317: Manganese/iron transport system                                               | OSC | Structural complex Environmental information processing Metallic cation, iron-siderophore and vitamin B12 transport system Manganese/iron transport system M00317       |
| M00324: Dipeptide transport system                                                    | OSC | Structural complex Environmental information processing Peptide and nickel transport system Dipeptide transport system M00324                                           |
| M00328: Hemophore/metalloprotease transport system                                    | OSC | Structural complex Environmental information processing Bacterial secretion system Hemophore/metalloprotease transport system M00328                                    |
| M00332: Type III secretion system                                                     | OSC | Structural complex Environmental information processing Bacterial secretion system Type III secretion system M00332                                                     |
| M00348: Glutathione transport system                                                  | OSC | Structural complex Environmental information processing Peptide and nickel transport system Glutathione transport system M00348                                         |
| M00349: Microcin C transport system                                                   | OSC | Structural complex Environmental information processing Peptide and nickel transport system Microcin C transport system M00349                                          |
| M00417: Cytochrome o ubiquinol oxidase                                                | OSC | Structural complex Energy metabolism ATP synthesis Cytochrome o ubiquinol oxidase M00417                                                                                |
| M00435: Taurine transport system                                                      | OSC | Structural complex Environmental information processing Mineral and organic ion transport system Taurine transport system M00435                                        |
| M00436: Sulfonate transport system                                                    | OSC | Structural complex Environmental information processing Mineral and organic ion transport system Sulfonate transport system M00436                                      |
| M00445: EnvZ-OmpR (osmotic stress response) two-component regulatory system           | OSC | Functional set Environmental information processing Two-component regulatory system EnvZ-OmpR (osmotic stress response) two-component regulatory system M00445          |
| M00446: RstB-RstA two-component regulatory system                                     | OSC | Functional set Environmental information processing Two-component regulatory system RstB-RstA two-component regulatory system M00446                                    |
| M00453: QseC-QseB (quorum sensing) two-component regulatory system                    | OSC | Functional set Environmental information processing Two-component regulatory system QseC-QseB (quorum sensing) two-component regulatory system M00453                   |
| M00474: RcsC-RcsD-RcsB (capsule synthesis) two-component regulatory system            | OSC | Functional set Environmental information processing Two-component regulatory system RcsC-RcsD-RcsB (capsule synthesis) two-component regulatory system M00474           |
| M00475: BarA-UvrY (central carbon metabolism) two-component regulatory system         | OSC | Functional set Environmental information processing Two-component regulatory system BarA-UvrY (central carbon metabolism) two-component regulatory system M00475        |
| M00477: EvgS-EvgA (acid and drug tolerance) two-component regulatory system           | OSC | Functional set Environmental information processing Two-component regulatory system EvgS-EvgA (acid and drug tolerance) two-component regulatory system M00477          |
| M00513: LuxQN/CqsS-LuxU-LuxO (quorum sensing) two-component regulatory system         | OSC | Functional set Environmental information processing Two-component regulatory system LuxQN/CqsS-LuxU-LuxO (quorum sensing) two-component regulatory system M00513        |
| M00531: Assimilatory nitrate reduction, nitrate => ammonia                            | OSC | Pathway module Energy metabolism Nitrogen metabolism Assimilatory nitrate reduction, nitrate => ammonia M00531                                                          |
| M00533: Homoprotocatechuate degradation, homoprotocatechuate => 2-oxohept-3-enedioate | OSC | Pathway module Nucleotide and amino acid metabolism Aromatic amino acid metabolism Homoprotocatechuate degradation, homoprotocatechuate => 2-oxohept-3-enedioate M00533 |
| M00537: Xylene degradation, xylene => methylbenzoate                                  | OSC | Pathway module Secondary metabolism Aromatics degradation Xylene degradation, xylene => methylbenzoate M00537                                                           |
| M00538: Toluene degradation, toluene => benzoate                                      | OSC | Pathway module Secondary metabolism Aromatics degradation Toluene degradation, toluene => benzoate M00538                                                               |

|                                                                                                |       |                                                                                                                                                                   |
|------------------------------------------------------------------------------------------------|-------|-------------------------------------------------------------------------------------------------------------------------------------------------------------------|
| M00539: Cumate degradation, p-cumate => 2-oxopent-4-enoate + 2-methylpropanoate                | OSC   | Pathway module Secondary metabolism Aromatics degradation Cumate degradation, p-cumate => 2-oxopent-4-enoate + 2-methylpropanoate M00539                          |
| M00540: Benzoate degradation, cyclohexanecarboxylic acid =>pimeloyl-CoA                        | OSC   | Pathway module Secondary metabolism Aromatics degradation Benzoate degradation, cyclohexanecarboxylic acid =>pimeloyl-CoA M00540                                  |
| M00542: EHEC/EPEC pathogenicity signature, T3SS and effectors                                  | OSC   | Signature module Gene set Pathogenicity  EHEC/EPEC pathogenicity signature, T3SS and effectors M00542                                                             |
| M00546: Purine degradation, xanthine => urea                                                   | OSC   | Pathway module Nucleotide and amino acid metabolism Purine metabolism Purine degradation, xanthine => urea M00546                                                 |
| M00551: Benzoate degradation, benzoate => catechol / methylbenzoate => methylcatechol          | OSC   | Pathway module Secondary metabolism Aromatics degradation Benzoate degradation, benzoate => catechol / methylbenzoate => methylcatechol M00551                    |
| M00555: Betaine biosynthesis, choline => betaine                                               | OSC   | Pathway module Nucleotide and amino acid metabolism Serine and threonine metabolism Betaine biosynthesis, choline => betaine M00555                               |
| M00568: Catechol ortho-cleavage, catechol => 3-oxoadipate                                      | OSC   | Pathway module Secondary metabolism Aromatics degradation Catechol ortho-cleavage, catechol => 3-oxoadipate M00568                                                |
| M00574: Pertussis pathogenicity signature 1, pertussis toxin                                   | OSC   | Signature module Gene set Pathogenicity  Pertussis pathogenicity signature 1, pertussis toxin M00574                                                              |
| M00575: Pertussis pathogenicity signature 2, T1SS                                              | OSC   | Signature module Gene set Pathogenicity  Pertussis pathogenicity signature 2, T1SS M00575                                                                         |
| M00580: Pentose phosphate pathway, archaea, fructose 6P => ribose 5P                           | OSC   | Pathway module Carbohydrate and lipid metabolism Central carbohydrate metabolism Pentose phosphate pathway, archaea, fructose 6P => ribose 5P M00580              |
| M00590: Erythritol transport system                                                            | OSC   | Structural complex Environmental information processing Saccharide, polyol, and lipid transport system Erythritol transport system M00590                         |
| M00593: Inositol transport system                                                              | OSC   | Structural complex Environmental information processing Saccharide, polyol, and lipid transport system Inositol transport system M00593                           |
| M00616: Sulfate-sulfur assimilation                                                            | OSC   | Signature module Gene set Metabolic capacity Sulfate-sulfur assimilation M00616                                                                                   |
| M00622: Nicotinate degradation, nicotinate => fumarate                                         | OSC   | Pathway module Nucleotide and amino acid metabolism Cofactor and vitamin biosynthesis Nicotinate degradation, nicotinate => fumarate M00622                       |
| M00638: Salicylate degradation, salicylate => gentisate                                        | OSC   | Pathway module Secondary metabolism Aromatics degradation Salicylate degradation, salicylate => gentisate M00638                                                  |
| M00643: Multidrug resistance, efflux pump MexXY-OprM                                           | OSC   | Signature module Gene set Drug resistance Multidrug resistance, efflux pump MexXY-OprM M00643                                                                     |
| M00649: Multidrug resistance, efflux pump AdeABC                                               | OSC   | Signature module Gene set Drug resistance Multidrug resistance, efflux pump AdeABC M00649                                                                         |
| M00655: AdeS-AdeR two-component regulatory system                                              | OSC   | Functional set Environmental information processing Two-component regulatory system AdeS-AdeR two-component regulatory system M00655                              |
| M00660: Xanthomonas spp pathogenicity signature, T3SS and effectors                            | OSC   | Signature module Gene set Plant pathogenicity Xanthomonas spp  pathogenicity signature, T3SS and effectors M00660                                                 |
| M00664: Nodulation                                                                             | OSC   | Signature module Gene set Symbiosis Nodulation M00664                                                                                                             |
| M00696: Multidrug resistance, efflux pump AcrEF-ToIC                                           | OSC   | Signature module Gene set Drug resistance Multidrug resistance, efflux pump AcrEF-ToIC M00696                                                                     |
| M00697: Multidrug resistance, efflux pump MdtEF-ToIC                                           | OSC   | Signature module Gene set Drug resistance Multidrug resistance, efflux pump MdtEF-ToIC M00697                                                                     |
| M00709: Macrolide resistance, MacAB-ToIC transporter                                           | OSC   | Functional set Environmental information processing Drug efflux transporter/pump Macrolide resistance, MacAB-ToIC transporter M00709                              |
| M00722: Cationic antimicrobial peptide (CAMP) resistance, phosphoethanolamine transferase PmrC | OSC   | Functional set Environmental information processing Drug resistance Cationic antimicrobial peptide (CAMP) resistance, phosphoethanolamine transferase PmrC M00722 |
| M00736: Nocardicin A biosynthesis, L-pHPG + arginine + serine => nocardicin A                  | OSC   | Pathway module Secondary metabolism Biosynthesis of secondary metabolites Nocardicin A biosynthesis, L-pHPG + arginine + serine => nocardicin A M00736            |
| M00743: Aminoglycoside resistance, protease HtpX                                               | OSC   | Functional set Environmental information processing Drug resistance Aminoglycoside resistance, protease HtpX M00743                                               |
| M00107: Steroid hormone biosynthesis, cholesterol => progesterone => progesterone              | OSTPd | Pathway module Carbohydrate and lipid metabolism Sterol biosynthesis Steroid hormone biosynthesis, cholesterol => progesterone => progesterone M00107             |
| M00117: Ubiquinone biosynthesis, prokaryotes, chorismate => ubiquinone                         | OSTPd | Pathway module Nucleotide and amino acid metabolism Cofactor and vitamin biosynthesis Ubiquinone biosynthesis, prokaryotes, chorismate => ubiquinone M00117       |

|                                                                                                            |       |                                                                                                                                                                                          |
|------------------------------------------------------------------------------------------------------------|-------|------------------------------------------------------------------------------------------------------------------------------------------------------------------------------------------|
| M00133: Polyamine biosynthesis, arginine => agmatine => putrescine => spermidine                           | OSTPd | Pathway module Nucleotide and amino acid metabolism Polyamine biosynthesis Polyamine biosynthesis, arginine => agmatine => putrescine => spermidine M00133                               |
| M00169: CAM (Crassulacean acid metabolism), light                                                          | OSTPd | Pathway module Energy metabolism Carbon fixation CAM (Crassulacean acid metabolism), light M00169                                                                                        |
| M00172: C4-dicarboxylic acid cycle, NADP - malic enzyme type                                               | OSTPd | Pathway module Energy metabolism Carbon fixation C4-dicarboxylic acid cycle, NADP - malic enzyme type M00172                                                                             |
| M00198: Putative sn-glycerol-phosphate transport system                                                    | OSTPd | Structural complex Environmental information processing Saccharide, polyol, and lipid transport system Putative sn-glycerol-phosphate transport system M00198                            |
| M00223: Phosphonate transport system                                                                       | OSTPd | Structural complex Environmental information processing Phosphate and amino acid transport system Phosphonate transport system M00223                                                    |
| M00237: Branched-chain amino acid transport system                                                         | OSTPd | Structural complex Environmental information processing Phosphate and amino acid transport system Branched-chain amino acid transport system M00237                                      |
| M00283: PTS system, ascorbate-specific II component                                                        | OSTPd | Structural complex Environmental information processing Phosphotransferase system (PTS) PTS system, ascorbate-specific II component M00283                                               |
| M00325: alpha-Hemolysin/cyclolysin transport system                                                        | OSTPd | Structural complex Environmental information processing Bacterial secretion system alpha-Hemolysin/cyclolysin transport system M00325                                                    |
| M00423: Molybdate/tungstate transport system                                                               | OSTPd | Structural complex Environmental information processing Mineral and organic ion transport system Molybdate/tungstate transport system M00423                                             |
| M00438: Nitrate/nitrite transport system                                                                   | OSTPd | Structural complex Environmental information processing Mineral and organic ion transport system Nitrate/nitrite transport system M00438                                                 |
| M00452: CusS-CusR (copper tolerance) two-component regulatory system                                       | OSTPd | Functional set Environmental information processing Two-component regulatory system CusS-CusR (copper tolerance) two-component regulatory system M00452                                  |
| M00493: AlgZ-AlgR (alginate production) two-component regulatory system                                    | OSTPd | Functional set Environmental information processing Two-component regulatory system AlgZ-AlgR (alginate production) two-component regulatory system M00493                               |
| M00497: GlnL-GlnG (nitrogen regulation) two-component regulatory system                                    | OSTPd | Functional set Environmental information processing Two-component regulatory system GlnL-GlnG (nitrogen regulation) two-component regulatory system M00497                               |
| M00501: PilS-PilR (type 4 fimbriae synthesis) two-component regulatory system                              | OSTPd | Functional set Environmental information processing Two-component regulatory system PilS-PilR (type 4 fimbriae synthesis) two-component regulatory system M00501                         |
| M00507: ChpA-ChpB/PilGH (chemosensory) two-component regulatory system                                     | OSTPd | Functional set Environmental information processing Two-component regulatory system ChpA-ChpB/PilGH (chemosensory) two-component regulatory system M00507                                |
| M00529: Denitrification, nitrate => nitrogen                                                               | OSTPd | Pathway module Energy metabolism Nitrogen metabolism Denitrification, nitrate => nitrogen M00529                                                                                         |
| M00530: Dissimilatory nitrate reduction, nitrate => ammonia                                                | OSTPd | Pathway module Energy metabolism Nitrogen metabolism Dissimilatory nitrate reduction, nitrate => ammonia M00530                                                                          |
| M00548: Benzene degradation, benzene => catechol                                                           | OSTPd | Pathway module Secondary metabolism Aromatics degradation Benzene degradation, benzene => catechol M00548                                                                                |
| M00607: Glycerol transport system                                                                          | OSTPd | Structural complex Environmental information processing Saccharide, polyol, and lipid transport system Glycerol transport system M00607                                                  |
| M00642: Multidrug resistance, efflux pump MexJK-OprM                                                       | OSTPd | Signature module Gene set Drug resistance Multidrug resistance, efflux pump MexJK-OprM M00642                                                                                            |
| M00646: Multidrug resistance, efflux pump AcrAD-ToIC                                                       | OSTPd | Functional set Environmental information processing Drug efflux transporter/pump Multidrug resistance, efflux pump AcrAD-ToIC M00646                                                     |
| M00647: Multidrug resistance, efflux pump AcrAB-ToIC/SmeDEF                                                | OSTPd | Functional set Environmental information processing Drug efflux transporter/pump Multidrug resistance, efflux pump AcrAB-ToIC/SmeDEF M00647                                              |
| M00669: gamma-Hexachlorocyclohexane transport system                                                       | OSTPd | Structural complex Environmental information processing Saccharide, polyol, and lipid transport system gamma-Hexachlorocyclohexane transport system M00669                               |
| M00670: Mce transport system                                                                               | OSTPd | Structural complex Environmental information processing Saccharide, polyol, and lipid transport system Mce transport system M00670                                                       |
| M00745: Imipenem resistance, repression of porin OprD                                                      | OSTPd | Signature module Gene set Drug resistance Imipenem resistance, repression of porin OprD M00745                                                                                           |
| M00761: Undecaprenylphosphate alpha-L-Ara4N biosynthesis, UDP-GlcA => undecaprenyl phosphate alpha-L-Ara4N | OSTPd | Pathway module Carbohydrate and lipid metabolism Other carbohydrate metabolism Undecaprenylphosphate alpha-L-Ara4N biosynthesis, UDP-GlcA => undecaprenyl phosphate alpha-L-Ara4N M00761 |
| M00762: Copper-processing system                                                                           | OSTPd | Structural complex Environmental information processing ABC-2 type and other transport systems Copper-processing system M00762                                                           |
| M00768: Multidrug resistance, efflux pump GesABC                                                           | OSTPd | Functional set Environmental information processing Drug efflux transporter/pump Multidrug resistance, efflux pump GesABC M00768                                                         |
| M00769: Multidrug resistance, efflux pump MexPQ-OpmE                                                       | OSTPd | Signature module Gene set Drug resistance Multidrug resistance, efflux pump MexPQ-OpmE M00769                                                                                            |
| M00003: Gluconeogenesis, oxaloacetate => fructose-6P                                                       | OSTPm | Pathway module Carbohydrate and lipid metabolism Central carbohydrate metabolism Gluconeogenesis, oxaloacetate => fructose-6P M00003                                                     |

|                                                                                                                |       |                                                                                                                                                                          |
|----------------------------------------------------------------------------------------------------------------|-------|--------------------------------------------------------------------------------------------------------------------------------------------------------------------------|
| M00189: Molybdate transport system                                                                             | OSTPm | Structural complex Environmental information processing Mineral and organic ion transport system Molybdate transport system M00189                                       |
| M00224: Fluoroquinolone transport system                                                                       | OSTPm | Structural complex Environmental information processing ABC-2 type and other transport systems Fluoroquinolone transport system M00224                                   |
| M00280: PTS system, glucitol/sorbitol-specific II component                                                    | OSTPm | Structural complex Environmental information processing Phosphotransferase system (PTS) PTS system, glucitol/sorbitol-specific II component M00280                       |
| M00433: Lysine biosynthesis, 2-oxoglutarate => 2-oxoadipate                                                    | OSTPm | Pathway module Nucleotide and amino acid metabolism Lysine metabolism Lysine biosynthesis, 2-oxoglutarate => 2-oxoadipate M00433                                         |
| M00450: BaeS-BaeR (envelope stress response) two-component regulatory system                                   | OSTPm | Functional set Environmental information processing Two-component regulatory system BaeS-BaeR (envelope stress response) two-component regulatory system M00450          |
| M00481: LiaS-LiaR (cell wall stress response) two-component regulatory system                                  | OSTPm | Functional set Environmental information processing Two-component regulatory system LiaS-LiaR (cell wall stress response) two-component regulatory system M00481         |
| M00608: 2-Oxocarboxylic acid chain extension, 2-oxoglutarate => 2-oxoadipate => 2-oxopimelate => 2-oxosuberate | OSTPm | Pathway module Energy metabolism Methane metabolism 2-Oxocarboxylic acid chain extension, 2-oxoglutarate => 2-oxoadipate => 2-oxopimelate => 2-oxosuberate M00608        |
| M00025: Tyrosine biosynthesis, chorismate => tyrosine                                                          | OSTPu | Pathway module Nucleotide and amino acid metabolism Aromatic amino acid metabolism Tyrosine biosynthesis, chorismate => tyrosine M00025                                  |
| M00034: Methionine salvage pathway                                                                             | OSTPu | Pathway module Nucleotide and amino acid metabolism Cysteine and methionine metabolism Methionine salvage pathway M00034                                                 |
| M00093: Phosphatidylethanolamine (PE) biosynthesis, PA => PS => PE                                             | OSTPu | Pathway module Carbohydrate and lipid metabolism Lipid metabolism Phosphatidylethanolamine (PE) biosynthesis, PA => PS => PE M00093                                      |
| M00122: Cobalamin biosynthesis, cobinamide => cobalamin                                                        | OSTPu | Pathway module Nucleotide and amino acid metabolism Cofactor and vitamin biosynthesis Cobalamin biosynthesis, cobinamide => cobalamin M00122                             |
| M00150: Fumarate reductase, prokaryotes                                                                        | OSTPu | Structural complex Energy metabolism ATP synthesis Fumarate reductase, prokaryotes M00150                                                                                |
| M00175: Nitrogen fixation, nitrogen => ammonia                                                                 | OSTPu | Pathway module Energy metabolism Nitrogen metabolism Nitrogen fixation, nitrogen => ammonia M00175                                                                       |
| M00186: Tungstate transport system                                                                             | OSTPu | Structural complex Environmental information processing Mineral and organic ion transport system Tungstate transport system M00186                                       |
| M00245: Cobalt/nickel transport system                                                                         | OSTPu | Structural complex Environmental information processing Metallic cation, iron-siderophore and vitamin B12 transport system Cobalt/nickel transport system M00245         |
| M00246: Nickel transport system                                                                                | OSTPu | Structural complex Environmental information processing Metallic cation, iron-siderophore and vitamin B12 transport system Nickel transport system M00246                |
| M00252: Lipooligosaccharide transport system                                                                   | OSTPu | Structural complex Environmental information processing ABC-2 type and other transport systems Lipooligosaccharide transport system M00252                               |
| M00265: PTS system, glucose-specific II component                                                              | OSTPu | Structural complex Environmental information processing Phosphotransferase system (PTS) PTS system, glucose-specific II component M00265                                 |
| M00266: PTS system, maltose and glucose-specific II component                                                  | OSTPu | Structural complex Environmental information processing Phosphotransferase system (PTS) PTS system, maltose and glucose-specific II component M00266                     |
| M00275: PTS system, cellobiose-specific II component                                                           | OSTPu | Structural complex Environmental information processing Phosphotransferase system (PTS) PTS system, cellobiose-specific II component M00275                              |
| M00279: PTS system, galactitol-specific II component                                                           | OSTPu | Structural complex Environmental information processing Phosphotransferase system (PTS) PTS system, galactitol-specific II component M00279                              |
| M00309: Non-phosphorylative Entner-Doudoroff pathway, gluconate/galactonate => glycerate                       | OSTPu | Pathway module Carbohydrate and lipid metabolism Central carbohydrate metabolism Non-phosphorylative Entner-Doudoroff pathway, gluconate/galactonate => glycerate M00309 |
| M00330: Adhesin protein transport system                                                                       | OSTPu | Structural complex Environmental information processing Bacterial secretion system Adhesin protein transport system M00330                                               |
| M00331: Type II general secretion system                                                                       | OSTPu | Structural complex Environmental information processing Bacterial secretion system Type II general secretion system M00331                                               |
| M00344: Formaldehyde assimilation, xylulose monophosphate pathway                                              | OSTPu | Pathway module Energy metabolism Methane metabolism Formaldehyde assimilation, xylulose monophosphate pathway M00344                                                     |
| M00345: Formaldehyde assimilation, ribulose monophosphate pathway                                              | OSTPu | Pathway module Energy metabolism Methane metabolism Formaldehyde assimilation, ribulose monophosphate pathway M00345                                                     |
| M00356: Methanogenesis, methanol => methane                                                                    | OSTPu | Pathway module Energy metabolism Methane metabolism Methanogenesis, methanol => methane M00356                                                                           |
| M00449: CreC-CreB (phosphate regulation) two-component regulatory system                                       | OSTPu | Functional set Environmental information processing Two-component regulatory system CreC-CreB (phosphate regulation) two-component regulatory system M00449              |
| M00457: TctE-TctD (tricarboxylic acid transport) two-component regulatory system                               | OSTPu | Functional set Environmental information processing Two-component regulatory system TctE-TctD (tricarboxylic acid transport) two-component regulatory system M00457      |

|                                                                                       |       |                                                                                                                                                                                |
|---------------------------------------------------------------------------------------|-------|--------------------------------------------------------------------------------------------------------------------------------------------------------------------------------|
| M00458: ResE-ResD (aerobic and anaerobic respiration) two-component regulatory system | OSTPu | Functional set   Environmental information processing   Two-component regulatory system   ResE-ResD (aerobic and anaerobic respiration) two-component regulatory system M00458 |
| M00485: KinABCDE-Spo0FA (sporulation control) two-component regulatory system         | OSTPu | Functional set   Environmental information processing   Two-component regulatory system   KinABCDE-Spo0FA (sporulation control) two-component regulatory system M00485         |
| M00502: GlrK-GlrR (amino sugar metabolism) two-component regulatory system            | OSTPu | Functional set   Environmental information processing   Two-component regulatory system   GlrK-GlrR (amino sugar metabolism) two-component regulatory system M00502            |
| M00506: CheA-CheYBV (chemotaxis) two-component regulatory system                      | OSTPu | Functional set   Environmental information processing   Two-component regulatory system   CheA-CheYBV (chemotaxis) two-component regulatory system M00506                      |
| M00528: Nitrification, ammonia => nitrite                                             | OSTPu | Pathway module   Energy metabolism   Nitrogen metabolism   Nitrification, ammonia => nitrite M00528                                                                            |
| M00579: Phosphate acetyltransferase-acetate kinase pathway, acetyl-CoA => acetate     | OSTPu | Pathway module   Energy metabolism   Carbon fixation   Phosphate acetyltransferase-acetate kinase pathway, acetyl-CoA => acetate M00579                                        |
| M00017: Methionine biosynthesis, aspartate => homoserine => methionine                | Tb    | Pathway module   Nucleotide and amino acid metabolism   Cysteine and methionine metabolism   Methionine biosynthesis, aspartate => homoserine => methionine M00017             |
| M00018: Threonine biosynthesis, aspartate => homoserine => threonine                  | Tb    | Pathway module   Nucleotide and amino acid metabolism   Serine and threonine metabolism   Threonine biosynthesis, aspartate => homoserine => threonine M00018                  |
| M00021: Cysteine biosynthesis, serine => cysteine                                     | Tb    | Pathway module   Nucleotide and amino acid metabolism   Cysteine and methionine metabolism   Cysteine biosynthesis, serine => cysteine M00021                                  |
| M00049: Adenine ribonucleotide biosynthesis, IMP => ADP,ATP                           | Tb    | Pathway module   Nucleotide and amino acid metabolism   Purine metabolism   Adenine ribonucleotide biosynthesis, IMP => ADP,ATP M00049                                         |
| M00077: Chondroitin sulfate degradation                                               | Tb    | Pathway module   Carbohydrate and lipid metabolism   Glycosaminoglycan metabolism   Chondroitin sulfate degradation M00077                                                     |
| M00078: Heparan sulfate degradation                                                   | Tb    | Pathway module   Carbohydrate and lipid metabolism   Glycosaminoglycan metabolism   Heparan sulfate degradation M00078                                                         |
| M00081: Pectin degradation                                                            | Tb    | Pathway module   Carbohydrate and lipid metabolism   Other carbohydrate metabolism   Pectin degradation M00081                                                                 |
| M00127: Thiamine biosynthesis, AIR => thiamine-P/thiamine-2P                          | Tb    | Pathway module   Nucleotide and amino acid metabolism   Cofactor and vitamin biosynthesis   Thiamine biosynthesis, AIR => thiamine-P/thiamine-2P M00127                        |
| M00129: Ascorbate biosynthesis, animals, glucose-1P => ascorbate                      | Tb    | Pathway module   Nucleotide and amino acid metabolism   Cofactor and vitamin biosynthesis   Ascorbate biosynthesis, animals, glucose-1P => ascorbate M00129                    |
| M00153: Cytochrome d ubiquinol oxidase                                                | Tb    | Structural complex   Energy metabolism   ATP synthesis   Cytochrome d ubiquinol oxidase M00153                                                                                 |
| M00157: F-type ATPase, prokaryotes and chloroplasts                                   | Tb    | Structural complex   Energy metabolism   ATP synthesis   F-type ATPase, prokaryotes and chloroplasts M00157                                                                    |
| M00176: Assimilatory sulfate reduction, sulfate => H2S                                | Tb    | Pathway module   Energy metabolism   Sulfur metabolism   Assimilatory sulfate reduction, sulfate => H2S M00176                                                                 |
| M00202: Oligogalacturonide transport system                                           | Tb    | Structural complex   Environmental information processing   Saccharide, polyol, and lipid transport system   Oligogalacturonide transport system M00202                        |
| M00225: Lysine/arginine/ornithine transport system                                    | Tb    | Structural complex   Environmental information processing   Phosphate and amino acid transport system   Lysine/arginine/ornithine transport system M00225                      |
| M00259: Heme transport system                                                         | Tb    | Structural complex   Environmental information processing   ABC-2 type and other transport systems   Heme transport system M00259                                              |
| M00267: PTS system, N-acetylglucosamine-specific II component                         | Tb    | Structural complex   Environmental information processing   Phosphotransferase system (PTS)   PTS system, N-acetylglucosamine-specific II component M00267                     |
| M00320: Lipopolysaccharide export system                                              | Tb    | Structural complex   Environmental information processing   ABC-2 type and other transport systems   Lipopolysaccharide export system M00320                                   |
| M00333: Type IV secretion system                                                      | Tb    | Structural complex   Environmental information processing   Bacterial secretion system   Type IV secretion system M00333                                                       |
| M00454: KdpD-KdpE (potassium transport) two-component regulatory system               | Tb    | Functional set   Environmental information processing   Two-component regulatory system   KdpD-KdpE (potassium transport) two-component regulatory system M00454               |
| M00498: NtrY-NtrX (nitrogen regulation) two-component regulatory system               | Tb    | Functional set   Environmental information processing   Two-component regulatory system   NtrY-NtrX (nitrogen regulation) two-component regulatory system M00498               |
| M00512: CckA-CtrA/CpdR (cell cycle control) two-component regulatory system           | Tb    | Functional set   Environmental information processing   Two-component regulatory system   CckA-CtrA/CpdR (cell cycle control) two-component regulatory system M00512           |
| M00520: ChvG-ChvI (acidity sensing) two-component regulatory system                   | Tb    | Functional set   Environmental information processing   Two-component regulatory system   ChvG-ChvI (acidity sensing) two-component regulatory system M00520                   |
| M00523: RegB-RegA (redox response) two-component regulatory system                    | Tb    | Functional set   Environmental information processing   Two-component regulatory system   RegB-RegA (redox response) two-component regulatory system M00523                    |

|                                                                                           |    |                                                                                                                                                                                         |
|-------------------------------------------------------------------------------------------|----|-----------------------------------------------------------------------------------------------------------------------------------------------------------------------------------------|
| M00524: FixL-FixJ (nitrogen fixation) two-component regulatory system                     | Tb | Functional set   Environmental information processing   Two-component regulatory system   FixL-FixJ (nitrogen fixation) two-component regulatory system M00524                          |
| M00525: Lysine biosynthesis, acetyl-DAP pathway, aspartate => lysine                      | Tb | Pathway module   Nucleotide and amino acid metabolism   Lysine metabolism   Lysine biosynthesis, acetyl-DAP pathway, aspartate => lysine M00525                                         |
| M00526: Lysine biosynthesis, DAP dehydrogenase pathway, aspartate => lysine               | Tb | Pathway module   Nucleotide and amino acid metabolism   Lysine metabolism   Lysine biosynthesis, DAP dehydrogenase pathway, aspartate => lysine M00526                                  |
| M00527: Lysine biosynthesis, DAP aminotransferase pathway, aspartate => lysine            | Tb | Pathway module   Nucleotide and amino acid metabolism   Lysine metabolism   Lysine biosynthesis, DAP aminotransferase pathway, aspartate => lysine M00527                               |
| M00541: Benzoyl-CoA degradation, benzoyl-CoA => 3-hydroxypimeloyl-CoA                     | Tb | Pathway module   Secondary metabolism   Aromatics degradation   Benzoyl-CoA degradation, benzoyl-CoA => 3-hydroxypimeloyl-CoA M00541                                                    |
| M00592: Inositol transport system                                                         | Tb | Structural complex   Environmental information processing   Saccharide, polyol, and lipid transport system   Inositol transport system M00592                                           |
| M00595: Thiosulfate oxidation by SOX complex, thiosulfate => sulfate                      | Tb | Pathway module   Energy metabolism   Sulfur metabolism   Thiosulfate oxidation by SOX complex, thiosulfate => sulfate M00595                                                            |
| M00597: Anoxygenic photosystem II                                                         | Tb | Structural complex   Energy metabolism   Photosynthesis   Anoxygenic photosystem II M00597                                                                                              |
| M00627: beta-Lactam resistance, Bla system                                                | Tb | Signature module   Gene set   Drug resistance   beta-Lactam resistance, Bla system M00627                                                                                               |
| M00628: beta-Lactam resistance, AmpC system                                               | Tb | Functional set   Environmental information processing   Drug resistance   beta-Lactam resistance, AmpC system M00628                                                                    |
| M00631: D-Galacturonate degradation (bacteria)                                            | Tb | Pathway module   Carbohydrate and lipid metabolism   Other carbohydrate metabolism   D-Galacturonate degradation (bacteria) M00631                                                      |
| M00644: Multidrug resistance, efflux pump MexHI-OprD                                      | Tb | Functional set   Environmental information processing   Drug efflux transporter/pump   Multidrug resistance, efflux pump MexHI-OprD M00644                                              |
| M00668: Tetracycline resistance, TetA transporter                                         | Tb | Functional set   Environmental information processing   Drug efflux transporter/pump   Tetracycline resistance, TetA transporter M00668                                                 |
| M00698: Multidrug resistance, efflux pump BpeEF-OprC                                      | Tb | Signature module   Gene set   Drug resistance   Multidrug resistance, efflux pump BpeEF-OprC M00698                                                                                     |
| M00701: Multidrug resistance, efflux pump EmrAB                                           | Tb | Functional set   Environmental information processing   Drug efflux transporter/pump   Multidrug resistance, efflux pump EmrAB M00701                                                   |
| M00008: Entner-Doudoroff pathway, glucose-6P => glyceraldehyde-3P + pyruvate              | Tp | Pathway module   Carbohydrate and lipid metabolism   Central carbohydrate metabolism   Entner-Doudoroff pathway, glucose-6P => glyceraldehyde-3P + pyruvate M00008                      |
| M00019: Valine/isoleucine biosynthesis, pyruvate => valine / 2-oxobutanoate => isoleucine | Tp | Pathway module   Nucleotide and amino acid metabolism   Branched-chain amino acid metabolism   Valine/isoleucine biosynthesis, pyruvate => valine / 2-oxobutanoate => isoleucine M00019 |
| M00024: Phenylalanine biosynthesis, chorismate => phenylalanine                           | Tp | Pathway module   Nucleotide and amino acid metabolism   Aromatic amino acid metabolism   Phenylalanine biosynthesis, chorismate => phenylalanine M00024                                 |
| M00026: Histidine biosynthesis, PRPP => histidine                                         | Tp | Pathway module   Nucleotide and amino acid metabolism   Histidine metabolism   Histidine biosynthesis, PRPP => histidine M00026                                                         |
| M00029: Urea cycle                                                                        | Tp | Pathway module   Nucleotide and amino acid metabolism   Arginine and proline metabolism   Urea cycle M00029                                                                             |
| M00032: Lysine degradation, lysine => saccharopine => acetoacetyl-CoA                     | Tp | Pathway module   Nucleotide and amino acid metabolism   Lysine metabolism   Lysine degradation, lysine => saccharopine => acetoacetyl-CoA M00032                                        |
| M00040: Tyrosine biosynthesis, prephanate => pretyrosine => tyrosine                      | Tp | Pathway module   Nucleotide and amino acid metabolism   Aromatic amino acid metabolism   Tyrosine biosynthesis, prephanate => pretyrosine => tyrosine M00040                            |
| M00044: Tyrosine degradation, tyrosine => homogentisate                                   | Tp | Pathway module   Nucleotide and amino acid metabolism   Aromatic amino acid metabolism   Tyrosine degradation, tyrosine => homogentisate M00044                                         |
| M00048: Inosine monophosphate biosynthesis, PRPP + glutamine => IMP                       | Tp | Pathway module   Nucleotide and amino acid metabolism   Purine metabolism   Inosine monophosphate biosynthesis, PRPP + glutamine => IMP M00048                                          |
| M00053: Pyrimidine deoxyribonucleotide biosynthesis, CDP/CTP => dCDP/dCTP,dTDP/dTTP       | Tp | Pathway module   Nucleotide and amino acid metabolism   Pyrimidine metabolism   Pyrimidine deoxyribonucleotide biosynthesis, CDP/CTP => dCDP/dCTP,dTDP/dTTP M00053                      |
| M00082: Fatty acid biosynthesis, initiation                                               | Tp | Pathway module   Carbohydrate and lipid metabolism   Fatty acid metabolism   Fatty acid biosynthesis, initiation M00082                                                                 |
| M00083: Fatty acid biosynthesis, elongation                                               | Tp | Pathway module   Carbohydrate and lipid metabolism   Fatty acid metabolism   Fatty acid biosynthesis, elongation M00083                                                                 |
| M00087: beta-Oxidation                                                                    | Tp | Pathway module   Carbohydrate and lipid metabolism   Fatty acid metabolism   beta-Oxidation M00087                                                                                      |
| M00095: C5 isoprenoid biosynthesis, mevalonate pathway                                    | Tp | Pathway module   Carbohydrate and lipid metabolism   Terpenoid backbone biosynthesis   C5 isoprenoid biosynthesis, mevalonate pathway M00095                                            |
| M00097: beta-Carotene biosynthesis, GGAP => beta-carotene                                 | Tp | Pathway module   Carbohydrate and lipid metabolism   Other terpenoid biosynthesis   beta-Carotene biosynthesis, GGAP => beta-carotene M00097                                            |

|                                                                                            |    |                                                                                                                                                                        |
|--------------------------------------------------------------------------------------------|----|------------------------------------------------------------------------------------------------------------------------------------------------------------------------|
| M00104: Bile acid biosynthesis, cholesterol => cholate                                     | Tp | Pathway module Carbohydrate and lipid metabolism Sterol biosynthesis Bile acid biosynthesis, cholesterol => cholate M00104                                             |
| M00114: Ascorbate biosynthesis, plants, glucose-6P => ascorbate                            | Tp | Pathway module Nucleotide and amino acid metabolism Cofactor and vitamin biosynthesis Ascorbate biosynthesis, plants, glucose-6P => ascorbate M00114                   |
| M00119: Pantothenate biosynthesis, valine/L-aspartate => pantothenate                      | Tp | Pathway module Nucleotide and amino acid metabolism Cofactor and vitamin biosynthesis Pantothenate biosynthesis, valine/L-aspartate => pantothenate M00119             |
| M00121: Heme biosynthesis, glutamate => protoheme/siroheme                                 | Tp | Pathway module Nucleotide and amino acid metabolism Cofactor and vitamin biosynthesis Heme biosynthesis, glutamate => protoheme/siroheme M00121                        |
| M00126: Tetrahydrofolate biosynthesis, GTP => THF                                          | Tp | Pathway module Nucleotide and amino acid metabolism Cofactor and vitamin biosynthesis Tetrahydrofolate biosynthesis, GTP => THF M00126                                 |
| M00128: Ubiquinone biosynthesis, eukaryotes, 4-hydroxybenzoate => ubiquinone               | Tp | Pathway module Nucleotide and amino acid metabolism Cofactor and vitamin biosynthesis Ubiquinone biosynthesis, eukaryotes, 4-hydroxybenzoate => ubiquinone M00128      |
| M00131: Inositol phosphate metabolism, Ins(1,3,4,5)P4 => Ins(1,3,4)P3 => myo-inositol      | Tp | Pathway module Carbohydrate and lipid metabolism Lipid metabolism Inositol phosphate metabolism, Ins(1,3,4,5)P4 => Ins(1,3,4)P3 => myo-inositol M00131                 |
| M00134: Polyamine biosynthesis, arginine => ornithine => putrescine                        | Tp | Pathway module Nucleotide and amino acid metabolism Polyamine biosynthesis Polyamine biosynthesis, arginine => ornithine => putrescine M00134                          |
| M00154: Cytochrome c oxidase                                                               | Tp | Structural complex Energy metabolism ATP synthesis Cytochrome c oxidase M00154                                                                                         |
| M00168: CAM (Crassulacean acid metabolism), dark                                           | Tp | Pathway module Energy metabolism Carbon fixation CAM (Crassulacean acid metabolism), dark M00168                                                                       |
| M00170: C4-dicarboxylic acid cycle, phosphoenolpyruvate carboxykinase type                 | Tp | Pathway module Energy metabolism Carbon fixation C4-dicarboxylic acid cycle, phosphoenolpyruvate carboxykinase type M00170                                             |
| M00249: Capsular polysaccharide transport system                                           | Tp | Structural complex Environmental information processing ABC-2 type and other transport systems Capsular polysaccharide transport system M00249                         |
| M00276: PTS system, mannose-specific II component                                          | Tp | Structural complex Environmental information processing Phosphotransferase system (PTS) PTS system, mannose-specific II component M00276                               |
| M00307: Pyruvate oxidation, pyruvate => acetyl-CoA                                         | Tp | Pathway module Carbohydrate and lipid metabolism Central carbohydrate metabolism Pyruvate oxidation, pyruvate => acetyl-CoA M00307                                     |
| M00372: Abscisic acid biosynthesis, beta-carotene => abscisic acid                         | Tp | Pathway module Carbohydrate and lipid metabolism Other terpenoid biosynthesis Abscisic acid biosynthesis, beta-carotene => abscisic acid M00372                        |
| M00373: Ethylmalonyl pathway                                                               | Tp | Pathway module Carbohydrate and lipid metabolism Other carbohydrate metabolism Ethylmalonyl pathway M00373                                                             |
| M00374: Dicarboxylate-hydroxybutyrate cycle                                                | Tp | Pathway module Energy metabolism Carbon fixation Dicarboxylate-hydroxybutyrate cycle M00374                                                                            |
| M00376: 3-Hydroxypropionate bi-cycle                                                       | Tp | Pathway module Energy metabolism Carbon fixation 3-Hydroxypropionate bi-cycle M00376                                                                                   |
| M00400: p97-Ufd1-Npl4 complex                                                              | Tp | Structural complex Genetic information processing Protein processing p97-Ufd1-Npl4 complex M00400                                                                      |
| M00432: Leucine biosynthesis, 2-oxoisovalerate => 2-oxoisocaproate                         | Tp | Pathway module Nucleotide and amino acid metabolism Branched-chain amino acid metabolism Leucine biosynthesis, 2-oxoisovalerate => 2-oxoisocaproate M00432             |
| M00515: FlrB-FlrC (polar flagellar synthesis) two-component regulatory system              | Tp | Functional set Environmental information processing Two-component regulatory system FlrB-FlrC (polar flagellar synthesis) two-component regulatory system M00515       |
| M00535: Isoleucine biosynthesis, pyruvate => 2-oxobutanoate                                | Tp | Pathway module Nucleotide and amino acid metabolism Branched-chain amino acid metabolism Isoleucine biosynthesis, pyruvate => 2-oxobutanoate M00535                    |
| M00545: Trans-cinnamate degradation, trans-cinnamate => acetyl-CoA                         | Tp | Pathway module Nucleotide and amino acid metabolism Aromatic amino acid metabolism Trans-cinnamate degradation, trans-cinnamate => acetyl-CoA M00545                   |
| M00554: Nucleotide sugar biosynthesis, galactose => UDP-galactose                          | Tp | Pathway module Carbohydrate and lipid metabolism Other carbohydrate metabolism Nucleotide sugar biosynthesis, galactose => UDP-galactose M00554                        |
| M00569: Catechol meta-cleavage, catechol => acetyl-CoA / 4-methylcatechol => propanoyl-CoA | Tp | Pathway module Secondary metabolism Aromatics degradation Catechol meta-cleavage, catechol => acetyl-CoA / 4-methylcatechol => propanoyl-CoA M00569                    |
| M00570: Isoleucine biosynthesis, threonine => 2-oxobutanoate => isoleucine                 | Tp | Pathway module Nucleotide and amino acid metabolism Branched-chain amino acid metabolism Isoleucine biosynthesis, threonine => 2-oxobutanoate => isoleucine M00570     |
| M00572: Pimeloyl-ACP biosynthesis, BioC-BioH pathway, malonyl-ACP => pimeloyl-ACP          | Tp | Pathway module Nucleotide and amino acid metabolism Cofactor and vitamin biosynthesis Pimeloyl-ACP biosynthesis, BioC-BioH pathway, malonyl-ACP => pimeloyl-ACP M00572 |
| M00603: Putative aldouronate transport system                                              | Tp | Structural complex Environmental information processing Saccharide, polyol, and lipid transport system Putative aldouronate transport system M00603                    |
| M00613: Anoxygenic photosynthesis in green nonsulfur bacteria                              | Tp | Signature module Gene set Metabolic capacity Anoxygenic photosynthesis in green nonsulfur bacteria M00613                                                              |

|                                                                                                           |    |                                                                                                                                                                   |
|-----------------------------------------------------------------------------------------------------------|----|-------------------------------------------------------------------------------------------------------------------------------------------------------------------|
| M00726: Cationic antimicrobial peptide (CAMP) resistance, lysyl-phosphatidylglycerol (L-PG) synthase MprF | Tp | Signature module Gene set Drug resistance Cationic antimicrobial peptide (CAMP) resistance, lysyl-phosphatidylglycerol (L-PG) synthase MprF M00726                |
| M00741: Propanoyl-CoA metabolism, propanoyl-CoA => succinyl-CoA                                           | Tp | Pathway module Carbohydrate and lipid metabolism Other carbohydrate metabolism Propanoyl-CoA metabolism, propanoyl-CoA => succinyl-CoA M00741                     |
| M00061: D-Glucuronate degradation                                                                         | Tu | Pathway module Carbohydrate and lipid metabolism Other carbohydrate metabolism D-Glucuronate degradation M00061                                                   |
| M00091: Phosphatidylcholine (PC) biosynthesis, PE => PC                                                   | Tu | Pathway module Carbohydrate and lipid metabolism Lipid metabolism Phosphatidylcholine (PC) biosynthesis, PE => PC M00091                                          |
| M00149: Succinate dehydrogenase, prokaryotes                                                              | Tu | Structural complex Energy metabolism ATP synthesis Succinate dehydrogenase, prokaryotes M00149                                                                    |
| M00151: Cytochrome bc1 complex respiratory unit                                                           | Tu | Structural complex Energy metabolism ATP synthesis Cytochrome bc1 complex respiratory unit M00151                                                                 |
| M00205: N-Acetylglucosamine transport system                                                              | Tu | Structural complex Environmental information processing Saccharide, polyol, and lipid transport system N-Acetylglucosamine transport system M00205                |
| M00251: Teichoic acid transport system                                                                    | Tu | Structural complex Environmental information processing ABC-2 type and other transport systems Teichoic acid transport system M00251                              |
| M00316: Manganese transport system                                                                        | Tu | Structural complex Environmental information processing Metallic cation, iron-siderophore and vitamin B12 transport system Manganese transport system M00316      |
| M00504: DctB-DctD (C4-dicarboxylate transport) two-component regulatory system                            | Tu | Functional set Environmental information processing Two-component regulatory system DctB-DctD (C4-dicarboxylate transport) two-component regulatory system M00504 |
| M00511: PleC-PleD (cell fate control) two-component regulatory system                                     | Tu | Functional set Environmental information processing Two-component regulatory system PleC-PleD (cell fate control) two-component regulatory system M00511          |
| M00606: N,N'-Diacetylchitobiose transport system                                                          | Tu | Structural complex Environmental information processing Saccharide, polyol, and lipid transport system N,N'-Diacetylchitobiose transport system M00606            |
| M00634: Oleandomycin transport system                                                                     | Tu | Structural complex Environmental information processing ABC-2 type and other transport systems Oleandomycin transport system M00634                               |
| M00704: Tetracycline resistance, efflux pump Tet38                                                        | Tu | Signature module Gene set Drug resistance Tetracycline resistance, efflux pump Tet38 M00704                                                                       |
| M00766: Streptomycin resistance, deactivating enzyme StrAB                                                | Tu | Functional set Environmental information processing Drug resistance Streptomycin resistance, deactivating enzyme StrAB M00766                                     |

<sup>†</sup> Column labelled “Habitat” represents the petroleum contaminated environment in which the corresponding KEGG Modules (as presented in column labelled “Differentially abundant KEGG Modules”), was found to be significantly differentially abundant by LEfSe using the one class, non-strict test (Please refer to Materials and methods, and Supplementary Table S3 for details). Acronyms represent the following habitats: A: Arctic, C: China oil refineries, I: India oil refineries, M: Mangrove, DWH: Marine sediments, OSC: Oil sands core, OSTPu: Oil sands tailings pond upper, OSTPm: Oil sands tailings pond median, OSTPd: Oil sands tailings pond deep, Tb: Taiga bottom active layer, Tu: Taiga upper active layer, Tp: Taiga permafrost layer.

<sup>‡</sup> KEGG Modules Hierarchy is described using the KEGG Modules Hierarchy as described in the KEGG Modules database (<http://www.kegg.jp/kegg/module.html>).

Supplementary data. Table S7. p-values of PERMANOVA results for pairwise comparison of taxonomic composition of all habitats using Bray-Curtis similarities.

|                                        | India oil refineries | Arctic | China oil refineries | Mangrove            | Marine sediments | Taiga upper active layer | Taiga bottom active layer | Taiga permafrost layer | Oil sands core | Oil sands tailings pond upper | Oil sands tailings pond median | Oil sands tailings pond deep |
|----------------------------------------|----------------------|--------|----------------------|---------------------|------------------|--------------------------|---------------------------|------------------------|----------------|-------------------------------|--------------------------------|------------------------------|
| India oil refineries (I)               |                      |        |                      |                     |                  |                          |                           |                        |                |                               |                                |                              |
| Arctic (A)                             | 0.0007               |        |                      |                     |                  |                          |                           |                        |                |                               |                                |                              |
| China oil refineries (C)               | 0.0015               | 0.0002 |                      |                     |                  |                          |                           |                        |                |                               |                                |                              |
| Mangrove (M)                           | 0.0258               | 0.0018 | 0.0048               |                     |                  |                          |                           |                        |                |                               |                                |                              |
| Marine sediments (DWH)                 | 0.0025               | 0.0001 | 0.0001               | 0.0105              |                  |                          |                           |                        |                |                               |                                |                              |
| Taiga upper active layer (Tu)          | 0.0267               | 0.0005 | 0.0012               | 0.029               | 0.0038           |                          |                           |                        |                |                               |                                |                              |
| Taiga bottom active layer (Tb)         | 0.0277               | 0.0005 | 0.0014               | 0.0312              | 0.0023           | 0.9426 <sup>‡</sup>      |                           |                        |                |                               |                                |                              |
| Taiga permafrost layer (Tp)            | 0.0301               | 0.001  | 0.0013               | 0.0575 <sup>‡</sup> | 0.0023           | 0.719 <sup>‡</sup>       | 0.6054 <sup>‡</sup>       |                        |                |                               |                                |                              |
| Oil sands core (OSC)                   | 0.003                | 0.0001 | 0.0002               | 0.0081              | 0.0012           | 0.0031                   | 0.0035                    | 0.003                  |                |                               |                                |                              |
| Oil sands tailings pond upper (OSTPu)  | 0.0259               | 0.0006 | 0.0011               | 0.0296              | 0.0015           | 0.0262                   | 0.029                     | 0.0293                 | 0.0034         |                               |                                |                              |
| Oil sands tailings pond median (OSTPm) | 0.029                | 0.0021 | 0.0048               | 0.0994 <sup>‡</sup> | 0.0084           | 0.0276                   | 0.0281                    | 0.0543 <sup>‡</sup>    | 0.0089         | 0.7089 <sup>‡</sup>           |                                |                              |
| Oil sands tailings pond deep (OSTPd)   | 0.0284               | 0.0009 | 0.0015               | 0.03                | 0.0029           | 0.0272                   | 0.0316                    | 0.0287                 | 0.0041         | 0.2565 <sup>‡</sup>           | 0.5163 <sup>‡</sup>            |                              |

<sup>‡</sup> P-values greater than 0.05 for PERMANOVA tests using Bray-Curtis similarity scores derived from taxonomic compositions between habitats signifying non-significant dissimilarity.

**Supplementary data. Table S8. Significant bacterial interactions in oil contaminated environments detected by SparCC (positive or negative correlation value > 0.6, p-value < 0.01). (Rows with interactions mentioned in the text are filled in blue).**

| Habitat <sup>†</sup> | OTU1 Classification <sup>†</sup>                                                                               | OTU2 Classification <sup>†</sup>                                                                         | Correlation | p-value |
|----------------------|----------------------------------------------------------------------------------------------------------------|----------------------------------------------------------------------------------------------------------|-------------|---------|
| A                    | p__Acidobacteria c__Acidobacteriia o__Acidobacteriales f__Koribacteraceae g__Candidatus_Koribacter s__         | p__Proteobacteria c__Alphaproteobacteria o__Rhizobiales f__Bradyrhizobiaceae g__ s__                     | 0.606438    | 0.004   |
| A                    | p__Acidobacteria c__Acidobacteriia o__Acidobacteriales f__ g__ s__                                             | p__Bacteroidetes c__ o__ f__ g__ s__                                                                     | 0.610808    | 0.0088  |
| A                    | p__Actinobacteria c__Actinobacteria o__Actinomycetales f__Nocardiodaceae g__Nocardioides s__plantarum          | p__Bacteroidetes c__Flavobacteriia o__Flavobacteriales f__Flavobacteriaceae g__ s__                      | 0.62121     | 0.0059  |
| A                    | p__Acidobacteria c__Acidobacteriia o__Acidobacteriales f__ g__ s__                                             | p__Proteobacteria c__Gammaproteobacteria o__Xanthomonadales f__Sinobacteraceae g__ s__                   | 0.62358     | 0.0067  |
| A                    | p__Acidobacteria c__DA052 o__Ellin6513 f__ g__ s__                                                             | p__Proteobacteria c__Gammaproteobacteria o__Xanthomonadales f__Sinobacteraceae g__ s__                   | 0.629303    | 0.0046  |
| A                    | p__Actinobacteria c__Acidimicrobiia o__Acidimicrobiales f__lamiaceae g__lamia s__                              | p__Actinobacteria c__Actinobacteria o__Actinomycetales f__Nocardiodaceae g__Nocardioides s__plantarum    | 0.631826    | 0.0022  |
| A                    | p__Acidobacteria c__Acidobacteriia o__Acidobacteriales f__Acidobacteriaceae g__Terriglobus s__                 | p__Proteobacteria c__Alphaproteobacteria o__Rhizobiales f__Bradyrhizobiaceae g__ s__                     | 0.63512     | 0.0036  |
| A                    | p__Actinobacteria c__Actinobacteria o__Actinomycetales f__Nocardiodaceae g__Nocardioides s__plantarum          | p__Actinobacteria c__Actinobacteria o__Actinomycetales f__Nocardiodaceae g__ s__                         | 0.646635    | 0.0034  |
| A                    | p__Acidobacteria c__Acidobacteriia o__Acidobacteriales f__Koribacteraceae g__Candidatus_Koribacter s__         | p__Acidobacteria c__DA052 o__Ellin6513 f__ g__ s__                                                       | 0.654059    | 0.0025  |
| A                    | p__Bacteroidetes c__ o__ f__ g__ s__                                                                           | p__Proteobacteria c__Gammaproteobacteria o__Xanthomonadales f__Sinobacteraceae g__ s__                   | 0.657003    | 0.0024  |
| A                    | p__Actinobacteria c__Acidimicrobiia o__Acidimicrobiales f__lamiaceae g__lamia s__                              | p__Bacteroidetes c__Flavobacteriia o__Flavobacteriales f__Flavobacteriaceae g__ s__                      | 0.702216    | 0.0011  |
| A                    | p__Acidobacteria c__DA052 o__Ellin6513 f__ g__ s__                                                             | p__Proteobacteria c__Alphaproteobacteria o__Rhizobiales f__Bradyrhizobiaceae g__ s__                     | 0.723816    | 0.0013  |
| A                    | p__Acidobacteria c__Acidobacteriia o__Acidobacteriales f__Koribacteraceae g__Candidatus_Koribacter s__         | p__Acidobacteria c__Acidobacteriia o__Acidobacteriales f__ g__ s__                                       | 0.726325    | 0.0001  |
| A                    | p__Actinobacteria c__Actinobacteria o__Actinomycetales f__Microbacteriaceae g__Microbacterium s__              | p__Actinobacteria c__Actinobacteria o__Actinomycetales f__Micrococcaceae g__ s__                         | 0.736769    | 0.0005  |
| A                    | p__Bacteroidetes c__Saprospirae o__Saprospirales f__Chitinophagaceae g__ s__                                   | p__Proteobacteria c__Alphaproteobacteria o__Rhizobiales f__Bradyrhizobiaceae g__ s__                     | 0.742711    | 0.0048  |
| A                    | p__Acidobacteria c__Acidobacteriia o__Acidobacteriales f__ g__ s__                                             | p__Proteobacteria c__Alphaproteobacteria o__Rhizobiales f__Bradyrhizobiaceae g__ s__                     | 0.769795    | 0.0007  |
| A                    | p__Acidobacteria c__Acidobacteriia o__Acidobacteriales f__Acidobacteriaceae g__Terriglobus s__                 | p__Acidobacteria c__DA052 o__Ellin6513 f__ g__ s__                                                       | 0.824712    | 0.0001  |
| A                    | p__Acidobacteria c__Acidobacteriia o__Acidobacteriales f__Acidobacteriaceae g__Terriglobus s__                 | p__Acidobacteria c__Acidobacteriia o__Acidobacteriales f__ g__ s__                                       | 0.843217    | 0.0001  |
| A                    | p__Acidobacteria c__Acidobacteriia o__Acidobacteriales f__ g__ s__                                             | p__Acidobacteria c__DA052 o__Ellin6513 f__ g__ s__                                                       | 0.877044    | 0       |
| C                    | p__Actinobacteria c__Actinobacteria o__Actinomycetales f__Dietziaceae g__Dietzia s__                           | p__Verrucomicrobia c__Spartobacteria o__Chthoniobacteriales f__Chthoniobacteraceae g__ s__               | -0.73237    | 0.0006  |
| C                    | p__Actinobacteria c__Actinobacteria o__Actinomycetales f__Mycobacteriaceae g__Mycobacterium s__                | p__Gemmatimonadetes c__Gemm-3 o__ f__ g__ s__                                                            | -0.71167    | 0.0034  |
| C                    | p__Actinobacteria c__Actinobacteria o__Actinomycetales f__Intrasporangiaceae g__ s__                           | p__Gemmatimonadetes c__Gemm-3 o__ f__ g__ s__                                                            | -0.70465    | 0.0019  |
| C                    | p__Gemmatimonadetes c__Gemm-3 o__ f__ g__ s__                                                                  | p__Proteobacteria c__Gammaproteobacteria o__Xanthomonadales f__Sinobacteraceae g__ s__                   | -0.68534    | 0.0039  |
| C                    | p__Actinobacteria c__Actinobacteria o__Actinomycetales f__Nocardiodaceae g__ s__                               | p__Cyanobacteria c__Oscillatoriothyraceae o__Oscillatoriales f__Phormidiaceae g__Phormidium s__          | -0.68273    | 0.0007  |
| C                    | p__Acidobacteria c__Acidobacteria-6 o__iii1-15 f__ g__ s__                                                     | p__Actinobacteria c__Actinobacteria o__Actinomycetales f__Dietziaceae g__Dietzia s__                     | -0.67274    | 0.0024  |
| C                    | p__Chloroflexi c__Ellin6529 o__ f__ g__ s__                                                                    | p__Cyanobacteria c__ o__ f__ g__ s__                                                                     | -0.67055    | 0.0005  |
| C                    | p__Chloroflexi c__S085 o__ f__ g__ s__                                                                         | p__Chloroflexi c__TK10 o__AKYG885 f__Dolo_23 g__ s__                                                     | -0.66641    | 0.0002  |
| C                    | p__Actinobacteria c__Actinobacteria o__Actinomycetales f__Dietziaceae g__Dietzia s__                           | p__Verrucomicrobia c__Spartobacteria o__Chthoniobacteriales f__Chthoniobacteraceae g__Chthoniobacter s__ | -0.66151    | 0.0016  |
| C                    | p__Actinobacteria c__Actinobacteria o__Actinomycetales f__Micrococcaceae g__Arthrobacter s__psychrolactophilus | p__Gemmatimonadetes c__Gemm-5 o__ f__ g__ s__                                                            | -0.65436    | 0.0027  |
| C                    | p__Actinobacteria c__Actinobacteria o__Actinomycetales f__Dietziaceae g__Dietzia s__                           | p__Planctomycetes c__Planctomycetia o__Pirellulales f__Pirellulaceae g__ s__                             | -0.65032    | 0.0024  |
| C                    | p__Actinobacteria c__Acidimicrobiia o__Acidimicrobiales f__ g__ s__                                            | p__Gemmatimonadetes c__Gemm-5 o__ f__ g__ s__                                                            | -0.64924    | 0.0025  |
| C                    | p__Actinobacteria c__Actinobacteria o__Actinomycetales f__Geodermatophilaceae g__ s__                          | p__Verrucomicrobia c__Verrucomicrobiae o__Verrucomicrobiales f__Verrucomicrobiaceae g__Luteolibacter s__ | -0.64791    | 0.0017  |
| C                    | p__Acidobacteria c__Acidobacteria-6 o__iii1-15 f__mb2424 g__ s__                                               | p__Actinobacteria c__Actinobacteria o__Actinomycetales f__Dietziaceae g__Dietzia s__                     | -0.63946    | 0.0029  |
| C                    | p__Actinobacteria c__Actinobacteria o__Actinomycetales f__Intrasporangiaceae g__ s__                           | p__Proteobacteria c__Alphaproteobacteria o__Sphingomonadales f__Sphingomonadaceae g__Kaistobacter s__    | -0.63305    | 0.0041  |
| C                    | p__Actinobacteria c__Actinobacteria o__Actinomycetales f__Micrococcaceae g__Arthrobacter s__psychrolactophilus | p__Verrucomicrobia c__Verrucomicrobiae o__Verrucomicrobiales f__Verrucomicrobiaceae g__Luteolibacter s__ | -0.62693    | 0.0071  |

|   |                                                                                                          |                                                                                              |          |        |
|---|----------------------------------------------------------------------------------------------------------|----------------------------------------------------------------------------------------------|----------|--------|
| C | p_Acidobacteria c_Chloracidobacteria o_RB41 f_Ellin6075 g_ s__                                           | p_Chloroflexi c_Ktedonobacteria o_Thermogemmatisporales f_Thermogemmatisporaceae g_ s__      | -0.62566 | 0.0011 |
| C | p_Acidobacteria c_Chloracidobacteria o_RB41 f_Ellin6075 g_ s__                                           | p_Actinobacteria c_Actinobacteria o_Actinomycetales f_Nocardoidaceae g_ s__                  | -0.62425 | 0.0047 |
| C | p_Actinobacteria c_Actinobacteria o_Actinomycetales f_Microbacteriaceae g_Microbacterium s__             | p_Verrucomicrobia c_Spartobacteria o_Chthoniobacterales f_Chthoniobacteraceae g_ s__         | -0.62039 | 0.0048 |
| C | p_Actinobacteria c_Actinobacteria o_Actinomycetales f_Geodermatophilaceae g_ s__                         | p_Cyanobacteria c_Oscillatoriothricaceae o_Oscillatoriales f_Phormidiaceae g_Phormidium s__  | -0.61876 | 0.0012 |
| C | p_Actinobacteria c_Actinobacteria o_Actinomycetales f_Micromonosporaceae g_Solwaraspora s__              | p_Gemmatimonadetes c_Gemm-3 o_ f_ g_ s__                                                     | -0.61726 | 0.0072 |
| C | p_Actinobacteria c_Acidimicrobia o_Acidimicrobiales f_ g_ s__                                            | p_Actinobacteria c_Thermoleophilia o_Gaiellales f_Gaiellaceae g_ s__                         | 0.604518 | 0.0013 |
| C | p_Actinobacteria c_Thermoleophilia o_Solirubrobacterales f_Solirubrobacteraceae g_ s__                   | p_Proteobacteria c_Deltaproteobacteria o_Myxococcales f_Myxococcaceae g_Anaeromyxobacter s__ | 0.605995 | 0.0041 |
| C | p_Actinobacteria c_Actinobacteria o_Actinomycetales f_Mycobacteriaceae g_Mycobacterium s__               | p_Proteobacteria c_Deltaproteobacteria o_Myxococcales f_Myxococcaceae g_Anaeromyxobacter s__ | 0.620749 | 0.0035 |
| C | p_Actinobacteria c_Actinobacteria o_Actinomycetales f_Mycobacteriaceae g_Mycobacterium s__               | p_Chloroflexi c_Ktedonobacteria o_JG30-KF-AS9 f_ g_ s__                                      | 0.623933 | 0.0002 |
| C | p_Actinobacteria c_Thermoleophilia o_Gaiellales f_Gaiellaceae g_ s__                                     | p_Chloroflexi c_Ktedonobacteria o_Thermogemmatisporales f_Thermogemmatisporaceae g_ s__      | 0.626391 | 0.0042 |
| C | p_Actinobacteria c_Actinobacteria o_Actinomycetales f_Micrococcaceae g_Arthrobacter s_psychrolactophilus | p_Actinobacteria c_Actinobacteria o_Actinomycetales f_Nocardoidaceae g_ s__                  | 0.628133 | 0.0062 |
| C | p_Chloroflexi c_Ktedonobacteria o_JG30-KF-AS9 f_ g_ s__                                                  | p_Proteobacteria c_Gammaproteobacteria o_Xanthomonadales f_Sinobacteraceae g_ s__            | 0.629345 | 0.0002 |
| C | p_Actinobacteria c_Actinobacteria o_Actinomycetales f_Nocardoidaceae g_ s__                              | p_Proteobacteria c_Gammaproteobacteria o_Xanthomonadales f_Sinobacteraceae g_ s__            | 0.636663 | 0.0061 |
| C | p_Actinobacteria c_Actinobacteria o_Actinomycetales f_Intrasporangiaceae g_ s__                          | p_Actinobacteria c_Thermoleophilia o_Solirubrobacterales f_Solirubrobacteraceae g_ s__       | 0.64268  | 0.004  |
| C | p_Actinobacteria c_Actinobacteria o_Actinomycetales f_Mycobacteriaceae g_Mycobacterium s__               | p_Actinobacteria c_Thermoleophilia o_Solirubrobacterales f_Solirubrobacteraceae g_ s__       | 0.646094 | 0.0062 |
| C | p_Actinobacteria c_Actinobacteria o_Actinomycetales f_Microbacteriaceae g_Microbacterium s__             | p_Proteobacteria c_Deltaproteobacteria o_Myxococcales f_Myxococcaceae g_Anaeromyxobacter s__ | 0.652514 | 0.0039 |
| C | p_Chloroflexi c_Thermomicrobia o_JG30-KF-CM45 f_ g_ s__                                                  | p_Proteobacteria c_Gammaproteobacteria o_Xanthomonadales f_Sinobacteraceae g_ s__            | 0.658582 | 0.0064 |
| C | p_Chloroflexi c_Thermomicrobia o_JG30-KF-CM45 f_ g_ s__                                                  | p_Proteobacteria c_Gammaproteobacteria o_Pseudomonadales f_Moraxellaceae g_Alkanindiges s__  | 0.663016 | 0.0043 |
| C | p_Actinobacteria c_Actinobacteria o_Actinomycetales f_Nocardoidaceae g_ s__                              | p_Chloroflexi c_Ktedonobacteria o_Thermogemmatisporales f_Thermogemmatisporaceae g_ s__      | 0.670211 | 0.002  |
| C | p_Actinobacteria c_Actinobacteria o_Actinomycetales f_Microbacteriaceae g_Microbacterium s__             | p_Chloroflexi c_Chloroflexi o_Roseiflexales f_Kouleothrixaceae g_ s__                        | 0.672805 | 0.0049 |
| C | p_Actinobacteria c_Actinobacteria o_Actinomycetales f_Microbacteriaceae g_Microbacterium s__             | p_Actinobacteria c_Thermoleophilia o_Gaiellales f_Gaiellaceae g_ s__                         | 0.674267 | 0.0044 |
| C | p_Actinobacteria c_Actinobacteria o_Actinomycetales f_Geodermatophilaceae g_ s__                         | p_Actinobacteria c_Actinobacteria o_Actinomycetales f_Nocardoidaceae g_ s__                  | 0.677651 | 0.0014 |
| C | p_Acidobacteria c_Solibacteres o_Solibacterales f_ g_ s__                                                | p_Actinobacteria c_Actinobacteria o_Actinomycetales f_Intrasporangiaceae g_ s__              | 0.678031 | 0.0035 |
| C | p_Acidobacteria c_Solibacteres o_Solibacterales f_ g_ s__                                                | p_Actinobacteria c_Actinobacteria o_Actinomycetales f_Mycobacteriaceae g_Mycobacterium s__   | 0.683276 | 0.0038 |
| C | p_Actinobacteria c_Actinobacteria o_Actinomycetales f_Geodermatophilaceae g_ s__                         | p_Actinobacteria c_Actinobacteria o_Actinomycetales f_Microbacteriaceae g_Microbacterium s__ | 0.688042 | 0.0009 |
| C | p_Acidobacteria c_Acidobacteria-6 o_iii1-15 f_mb2424 g_ s__                                              | p_Planctomycetes c_Planctomycetia o_Planctomycetales f_Planctomycetaceae g_Planctomyces s__  | 0.689099 | 0.009  |
| C | p_Bacteroidetes c_ o_ f_ g_ s__                                                                          | p_Planctomycetes c_Planctomycetia o_Planctomycetales f_Planctomycetaceae g_Planctomyces s__  | 0.690796 | 0.0059 |
| C | p_Actinobacteria c_Actinobacteria o_Actinomycetales f_Dietziaceae g_Dietzia s__                          | p_Proteobacteria c_Gammaproteobacteria o_Xanthomonadales f_Sinobacteraceae g_ s__            | 0.694573 | 0.0022 |
| C | p_Actinobacteria c_Actinobacteria o_Actinomycetales f_Mycobacteriaceae g_Mycobacterium s__               | p_Chloroflexi c_Ktedonobacteria o_Thermogemmatisporales f_Thermogemmatisporaceae g_ s__      | 0.695917 | 0.0005 |
| C | p_Actinobacteria c_Actinobacteria o_Actinomycetales f_Micromonosporaceae g_Solwaraspora s__              | p_Actinobacteria c_Actinobacteria o_Actinomycetales f_Nocardoidaceae g_ s__                  | 0.696505 | 0.001  |
| C | p_Acidobacteria c_Solibacteres o_Solibacterales f_ g_ s__                                                | p_Actinobacteria c_Actinobacteria o_Actinomycetales f_Micromonosporaceae g_Solwaraspora s__  | 0.699261 | 0.0014 |
| C | p_Actinobacteria c_Actinobacteria o_Actinomycetales f_Intrasporangiaceae g_ s__                          | p_Actinobacteria c_Actinobacteria o_Actinomycetales f_Microbacteriaceae g_Microbacterium s__ | 0.704085 | 0.0013 |
| C | p_Actinobacteria c_Actinobacteria o_Actinomycetales f_Mycobacteriaceae g_Mycobacterium s__               | p_Chloroflexi c_Thermomicrobia o_JG30-KF-CM45 f_ g_ s__                                      | 0.704785 | 0.0021 |
| C | p_Actinobacteria c_Actinobacteria o_Actinomycetales f_Dietziaceae g_Dietzia s__                          | p_Actinobacteria c_Actinobacteria o_Actinomycetales f_Mycobacteriaceae g_Mycobacterium s__   | 0.705065 | 0.0032 |
| C | p_Actinobacteria c_Acidimicrobia o_Acidimicrobiales f_AKIW874 g_ s__                                     | p_Actinobacteria c_Actinobacteria o_Actinomycetales f_Mycobacteriaceae g_Mycobacterium s__   | 0.708348 | 0.0053 |
| C | p_Actinobacteria c_Actinobacteria o_Actinomycetales f_Microbacteriaceae g_Microbacterium s__             | p_Actinobacteria c_Actinobacteria o_Actinomycetales f_Micromonosporaceae g_Solwaraspora s__  | 0.70866  | 0.0016 |
| C | p_Chloroflexi c_Chloroflexi o_Roseiflexales f_Kouleothrixaceae g_ s__                                    | p_Chloroflexi c_Ktedonobacteria o_Thermogemmatisporales f_Thermogemmatisporaceae g_ s__      | 0.708786 | 0.0003 |
| C | p_Actinobacteria c_Actinobacteria o_Actinomycetales f_Micromonosporaceae g_Solwaraspora s__              | p_Actinobacteria c_Thermoleophilia o_Solirubrobacterales f_Solirubrobacteraceae g_ s__       | 0.709648 | 0.0005 |

|     |                                                                                                         |                                                                                                          |          |        |
|-----|---------------------------------------------------------------------------------------------------------|----------------------------------------------------------------------------------------------------------|----------|--------|
| C   | p__Planctomycetes c__Planctomycetia o__Pirellulales f__Pirellulaceae g__ s__                            | p__Planctomycetes c__Planctomycetia o__Planctomycetales f__Planctomycetaceae g__Planctomyces s__         | 0.711906 | 0.0066 |
| C   | p__Actinobacteria c__Actinobacteria o__Actinomycetales f__Microbacteriaceae g__Microbacterium s__       | p__Actinobacteria c__Thermoleophilia o__Solirubrobacterales f__Solirubrobacteraceae g__ s__              | 0.713551 | 0.0013 |
| C   | p__Acidobacteria c__Chloracidobacteria o__RB41 f__Ellin6075 g__ s__                                     | p__Gemmatimonadetes c__ o__ f__ g__ s__                                                                  | 0.715023 | 0.0052 |
| C   | p__Actinobacteria c__Actinobacteria o__Actinomycetales f__Dietziaceae g__Dietzia s__                    | p__Proteobacteria c__Gammaproteobacteria o__Pseudomonadales f__Moraxellaceae g__Alkanindiges s__         | 0.715562 | 0.0022 |
| C   | p__Cyanobacteria c__Chloroplast o__Streptophyta f__ g__ s__                                             | p__Gemmatimonadetes c__Gemm-3 o__ f__ g__ s__                                                            | 0.717833 | 0.0067 |
| C   | p__Actinobacteria c__Thermoleophilia o__Solirubrobacterales f__Solirubrobacteraceae g__ s__             | p__Proteobacteria c__Gammaproteobacteria o__Xanthomonadales f__Sinobacteraceae g__ s__                   | 0.726341 | 0.0011 |
| C   | p__Planctomycetes c__Phycisphaerae o__ f__ g__ s__                                                      | p__Verrucomicrobia c__Spartobacteria o__Chthoniobacterales f__Chthoniobacteraceae g__Chthoniobacter s__  | 0.729392 | 0.0038 |
| C   | p__Gemmatimonadetes c__Gemm-3 o__ f__ g__ s__                                                           | p__Gemmatimonadetes c__ o__ f__ g__ s__                                                                  | 0.733753 | 0.0032 |
| C   | p__Acidobacteria c__Chloracidobacteria o__RB41 f__Ellin6075 g__ s__                                     | p__Cyanobacteria c__Oscillatoriothrixaceae o__Oscillatoriales f__Phormidiaceae g__Phormidium s__         | 0.734737 | 0.007  |
| C   | p__Proteobacteria c__Deltaproteobacteria o__Myxococcales f__Myxococcaceae g__Anaeromyxobacter s__       | p__Proteobacteria c__Gammaproteobacteria o__Xanthomonadales f__Sinobacteraceae g__ s__                   | 0.735714 | 0      |
| C   | p__Acidobacteria c__Acidobacteria-6 o__iii1-15 f__ g__ s__                                              | p__Planctomycetes c__Planctomycetia o__Pirellulales f__Pirellulaceae g__ s__                             | 0.739018 | 0.0085 |
| C   | p__Chloroflexi c__Ktedonobacteria o__Thermogemmatisporales f__Thermogemmatisporaceae g__ s__            | p__Proteobacteria c__Gammaproteobacteria o__Xanthomonadales f__Sinobacteraceae g__ s__                   | 0.741909 | 0.0002 |
| C   | p__Chloroflexi c__Chloroflexi o__Roseiflexales f__Kouleothrixaceae g__ s__                              | p__Proteobacteria c__Gammaproteobacteria o__Xanthomonadales f__Sinobacteraceae g__ s__                   | 0.74492  | 0.0042 |
| C   | p__Actinobacteria c__Actinobacteria o__Actinomycetales f__Microbacteriaceae g__Microbacterium s__       | p__Actinobacteria c__Actinobacteria o__Actinomycetales f__Mycobacteriaceae g__Mycobacterium s__          | 0.745595 | 0.0013 |
| C   | p__Acidobacteria c__Solibacteres o__Solibacterales f__ g__ s__                                          | p__Actinobacteria c__Thermoleophilia o__Solirubrobacterales f__Solirubrobacteraceae g__ s__              | 0.749175 | 0.0001 |
| C   | p__Actinobacteria c__Actinobacteria o__Actinomycetales f__Micromonosporaceae g__Solwaraspora s__        | p__Actinobacteria c__Actinobacteria o__Actinomycetales f__Mycobacteriaceae g__Mycobacterium s__          | 0.754661 | 0.0009 |
| C   | p__Gemmatimonadetes c__Gemm-3 o__ f__ g__ s__                                                           | p__Verrucomicrobia c__Spartobacteria o__Chthoniobacterales f__Chthoniobacteraceae g__ s__                | 0.755527 | 0.0062 |
| C   | p__Actinobacteria c__Actinobacteria o__Actinomycetales f__Dietziaceae g__Dietzia s__                    | p__Actinobacteria c__Actinobacteria o__Actinomycetales f__Microbacteriaceae g__Microbacterium s__        | 0.757977 | 0.0014 |
| C   | p__Planctomycetes c__Planctomycetia o__Pirellulales f__Pirellulaceae g__ s__                            | p__Verrucomicrobia c__Spartobacteria o__Chthoniobacterales f__Chthoniobacteraceae g__ s__                | 0.758399 | 0.0054 |
| C   | p__Actinobacteria c__Actinobacteria o__Actinomycetales f__Intrasporangiaceae g__ s__                    | p__Chloroflexi c__Chloroflexi o__Roseiflexales f__Kouleothrixaceae g__ s__                               | 0.759195 | 0.0011 |
| C   | p__Acidobacteria c__Chloracidobacteria o__RB41 f__Ellin6075 g__ s__                                     | p__Gemmatimonadetes c__Gemm-3 o__ f__ g__ s__                                                            | 0.759274 | 0.0048 |
| C   | p__Actinobacteria c__Actinobacteria o__Actinomycetales f__Dietziaceae g__Dietzia s__                    | p__Chloroflexi c__Thermomicrobia o__JG30-KF-CM45 f__ g__ s__                                             | 0.765789 | 0.0012 |
| C   | p__Actinobacteria c__Actinobacteria o__Actinomycetales f__Intrasporangiaceae g__ s__                    | p__Actinobacteria c__Actinobacteria o__Actinomycetales f__Mycobacteriaceae g__Mycobacterium s__          | 0.77922  | 0.001  |
| C   | p__Cyanobacteria c__Synechococcophycideae o__ f__ g__ s__                                               | p__Cyanobacteria c__ o__ f__ g__ s__                                                                     | 0.779928 | 0.0012 |
| C   | p__Actinobacteria c__Actinobacteria o__Actinomycetales f__Intrasporangiaceae g__ s__                    | p__Actinobacteria c__Actinobacteria o__Actinomycetales f__Micromonosporaceae g__Solwaraspora s__         | 0.781555 | 0.0002 |
| C   | p__Acidobacteria c__Solibacteres o__Solibacterales f__ g__ s__                                          | p__Proteobacteria c__Gammaproteobacteria o__Xanthomonadales f__Sinobacteraceae g__ s__                   | 0.788405 | 0.0005 |
| C   | p__Actinobacteria c__Actinobacteria o__Actinomycetales f__Microbacteriaceae g__Microbacterium s__       | p__Proteobacteria c__Gammaproteobacteria o__Xanthomonadales f__Sinobacteraceae g__ s__                   | 0.796212 | 0.0001 |
| C   | p__Actinobacteria c__Actinobacteria o__Actinomycetales f__Microbacteriaceae g__Microbacterium s__       | p__Chloroflexi c__Ktedonobacteria o__Thermogemmatisporales f__Thermogemmatisporaceae g__ s__             | 0.797855 | 0.0001 |
| C   | p__Verrucomicrobia c__Spartobacteria o__Chthoniobacterales f__Chthoniobacteraceae g__Chthoniobacter s__ | p__Verrucomicrobia c__Spartobacteria o__Chthoniobacterales f__Chthoniobacteraceae g__ s__                | 0.802049 | 0.0008 |
| C   | p__Acidobacteria c__Acidobacteria-6 o__iii1-15 f__mb2424 g__ s__                                        | p__Acidobacteria c__Acidobacteria-6 o__iii1-15 f__ g__ s__                                               | 0.81651  | 0.0014 |
| C   | p__Actinobacteria c__Actinobacteria o__Actinomycetales f__Micromonosporaceae g__Solwaraspora s__        | p__Proteobacteria c__Gammaproteobacteria o__Xanthomonadales f__Sinobacteraceae g__ s__                   | 0.847377 | 0      |
| C   | p__Gemmatimonadetes c__Gemm-5 o__ f__ g__ s__                                                           | p__Verrucomicrobia c__Verrucomicrobiae o__Verrucomicrobiales f__Verrucomicrobiaceae g__Luteolibacter s__ | 0.862249 | 0.0002 |
| C   | p__Actinobacteria c__Actinobacteria o__Actinomycetales f__Intrasporangiaceae g__ s__                    | p__Proteobacteria c__Gammaproteobacteria o__Xanthomonadales f__Sinobacteraceae g__ s__                   | 0.874985 | 0      |
| C   | p__Actinobacteria c__Actinobacteria o__Actinomycetales f__Mycobacteriaceae g__Mycobacterium s__         | p__Proteobacteria c__Gammaproteobacteria o__Xanthomonadales f__Sinobacteraceae g__ s__                   | 0.893887 | 0      |
| DWH | p__Bacteroidetes c__Flavobacteriia o__Flavobacteriales f__Flavobacteriaceae g__ s__                     | p__Proteobacteria c__Deltaproteobacteria o__Desulfuromonadales f__Desulfuromonadaceae g__ s__            | -0.6902  | 0.0017 |
| DWH | p__Proteobacteria c__Deltaproteobacteria o__Desulfobacterales f__Desulfobulbaceae g__ s__               | p__Verrucomicrobia c__Verrucomicrobiae o__Verrucomicrobiales f__Verrucomicrobiaceae g__Luteolibacter s__ | -0.68639 | 0.0029 |
| DWH | p__Proteobacteria c__Alphaproteobacteria o__Rhodobacterales f__Rhodobacteraceae g__Octadecabacter s__   | p__Proteobacteria c__Deltaproteobacteria o__NB1-j f__NB1-i g__ s__                                       | -0.67135 | 0.0049 |
| DWH | p__Proteobacteria c__Gammaproteobacteria o__Alteromonadales f__Colwelliaceae g__Colwellia s__           | p__Verrucomicrobia c__Verrucomicrobiae o__Verrucomicrobiales f__Verrucomicrobiaceae g__Luteolibacter s__ | -0.6596  | 0.0074 |

|       |                                                                                                                |                                                                                                               |          |        |
|-------|----------------------------------------------------------------------------------------------------------------|---------------------------------------------------------------------------------------------------------------|----------|--------|
| DWH   | p__Bacteroidetes c__Flavobacteriia o__Flavobacteriales f__Flavobacteriaceae g__ s__                            | p__Proteobacteria c__Deltaproteobacteria o__Desulfobacterales f__Desulfobulbaceae g__Desulfocapsa s__         | -0.65319 | 0.0018 |
| DWH   | p__Spirochaetes c__Spirochaetes o__Spirochaetales f__Spirochaetaceae g__ s__                                   | p__Verrucomicrobia c__Verrucomicrobiae o__Verrucomicrobiales f__Verrucomicrobiaceae g__Persicirhabdus s__     | -0.63334 | 0.0042 |
| DWH   | p__Proteobacteria c__Alphaproteobacteria o__Rhodobacterales f__Rhodobacteraceae g__Phaeobacter s__             | p__Proteobacteria c__Deltaproteobacteria o__Desulfobacterales f__Desulfobulbaceae g__ s__                     | -0.62926 | 0.0049 |
| DWH   | p__Planctomycetes c__Planctomycetia o__Planctomycetales f__Planctomycetaceae g__Planctomyces s__               | p__Verrucomicrobia c__Verrucomicrobiae o__Verrucomicrobiales f__Verrucomicrobiaceae g__Luteolibacter s__      | 0.723493 | 0.01   |
| DWH   | p__Bacteroidetes c__Flavobacteriia o__Flavobacteriales f__Flavobacteriaceae g__Lutimonas s__                   | p__Proteobacteria c__Alphaproteobacteria o__Rhodobacterales f__Rhodobacteraceae g__Phaeobacter s__            | 0.736513 | 0.0073 |
| DWH   | p__Actinobacteria c__Acidimicrobiia o__Acidimicrobiales f__koll13 g__ s__                                      | p__Planctomycetes c__Planctomycetia o__Pirellulales f__Pirellulaceae g__ s__                                  | 0.755076 | 0.0014 |
| DWH   | p__Actinobacteria c__Acidimicrobiia o__Acidimicrobiales f__koll13 g__ s__                                      | p__Proteobacteria c__Deltaproteobacteria o__NB1-j f__NB1-i g__ s__                                            | 0.760916 | 0.0027 |
| DWH   | p__Planctomycetes c__Planctomycetia o__Pirellulales f__Pirellulaceae g__ s__                                   | p__Proteobacteria c__Gammaproteobacteria o__Marinicellales f__Marinicellaceae g__ s__                         | 0.762125 | 0.0083 |
| DWH   | p__Actinobacteria c__Acidimicrobiia o__Acidimicrobiales f__koll13 g__ s__                                      | p__Proteobacteria c__Alphaproteobacteria o__Rhizobiales f__ g__ s__                                           | 0.793544 | 0.0007 |
| DWH   | p__Proteobacteria c__Deltaproteobacteria o__Desulfobacterales f__Desulfobulbaceae g__ s__                      | p__Proteobacteria c__Gammaproteobacteria o__Alteromonadales f__Colwelliaceae g__Colwellia s__                 | 0.808185 | 0.0005 |
| DWH   | p__Proteobacteria c__Alphaproteobacteria o__Rhizobiales f__ g__ s__                                            | p__Proteobacteria c__Gammaproteobacteria o__Marinicellales f__Marinicellaceae g__ s__                         | 0.84479  | 0.0088 |
| I     | p__Proteobacteria c__Alphaproteobacteria o__Rhizobiales f__Hyphomicrobiaceae g__Parvibaculum s__               | p__Proteobacteria c__Betaproteobacteria o__MOB121 f__ g__ s__                                                 | -0.89107 | 0.0032 |
| I     | p__Chloroflexi c__Anaerolineae o__envOPS12 f__ g__ s__                                                         | p__Proteobacteria c__Alphaproteobacteria o__Rhodospirillales f__Acetobacteraceae g__Acidocella s__            | -0.87625 | 0.0025 |
| I     | p__Bacteroidetes c__Flavobacteriia o__Flavobacteriales f__Weeksellaceae g__Chryseobacterium s__                | p__Proteobacteria c__Gammaproteobacteria o__Xanthomonadales f__Xanthomonadaceae g__Dyella s__ginsengisoli     | -0.87494 | 0.0055 |
| I     | p__Chlorobi c__Ignavibacteria o__Ignavibacteriales f__Ignavibacteriaceae g__ s__                               | p__Proteobacteria c__Alphaproteobacteria o__Rhodospirillales f__Acetobacteraceae g__Acidocella s__            | -0.8733  | 0.0057 |
| I     | p__Acidobacteria c__Acidobacteriia o__Acidobacteriales f__ g__ s__                                             | p__Chloroflexi c__Anaerolineae o__envOPS12 f__ g__ s__                                                        | -0.86394 | 0.0081 |
| I     | p__Bacteroidetes c__Saprospirae o__Saprospirales f__Chitinophagaceae g__ s__                                   | p__Proteobacteria c__Alphaproteobacteria o__Rhodospirillales f__Acetobacteraceae g__Acidocella s__            | -0.86366 | 0.0016 |
| I     | p__Proteobacteria c__Betaproteobacteria o__Burkholderiales f__Comamonadaceae g__Methylibium s__petroleiphilum  | p__Proteobacteria c__Betaproteobacteria o__MOB121 f__ g__ s__                                                 | -0.86204 | 0.0097 |
| I     | p__Cyanobacteria c__4C0d-2 o__MLE1-12 f__ g__ s__                                                              | p__Proteobacteria c__Alphaproteobacteria o__Rhizobiales f__Hyphomicrobiaceae g__Parvibaculum s__              | -0.81942 | 0.0079 |
| I     | p__Chloroflexi c__Anaerolineae o__Anaerolineales f__Anaerolinaceae g__ s__                                     | p__Proteobacteria c__Alphaproteobacteria o__Rhizobiales f__Hyphomicrobiaceae g__Parvibaculum s__              | -0.73563 | 0.0095 |
| I     | p__Proteobacteria c__Alphaproteobacteria o__Sphingomonadales f__Sphingomonadaceae g__Sphingobium s__yanoikuyae | p__Proteobacteria c__Alphaproteobacteria o__Sphingomonadales f__Sphingomonadaceae g__Sphingobium s__          | 0.924636 | 0.0095 |
| I     | p__Proteobacteria c__Alphaproteobacteria o__Rhizobiales f__Hyphomicrobiaceae g__Parvibaculum s__               | p__Proteobacteria c__Betaproteobacteria o__Burkholderiales f__Comamonadaceae g__Methylibium s__petroleiphilum | 0.945539 | 0.0089 |
| OSC   | p__Proteobacteria c__Betaproteobacteria o__Burkholderiales f__Oxalobacteraceae g__Cupriavidus s__              | p__Proteobacteria c__Betaproteobacteria o__Burkholderiales f__Oxalobacteraceae g__Herminiimonas s__           | -0.73902 | 0.0003 |
| OSC   | p__Proteobacteria c__Betaproteobacteria o__Burkholderiales f__Oxalobacteraceae g__Herminiimonas s__            | p__Proteobacteria c__Gammaproteobacteria o__Enterobacteriales f__Enterobacteriaceae g__ s__                   | 0.681937 | 0.0096 |
| OSC   | p__Actinobacteria c__Actinobacteria o__Actinomycetales f__Propionibacteriaceae g__Propionibacterium s__        | p__Proteobacteria c__Betaproteobacteria o__Burkholderiales f__Oxalobacteraceae g__Ralstonia s__               | 0.710158 | 0.0066 |
| OSC   | p__Actinobacteria c__Actinobacteria o__Actinomycetales f__Propionibacteriaceae g__Propionibacterium s__        | p__Proteobacteria c__Betaproteobacteria o__Burkholderiales f__Oxalobacteraceae g__Cupriavidus s__             | 0.779666 | 0.0063 |
| OSC   | p__Proteobacteria c__Betaproteobacteria o__Burkholderiales f__Oxalobacteraceae g__Cupriavidus s__              | p__Proteobacteria c__Betaproteobacteria o__Burkholderiales f__Oxalobacteraceae g__Ralstonia s__               | 0.796845 | 0.0024 |
| OSC   | p__Proteobacteria c__Betaproteobacteria o__Burkholderiales f__Oxalobacteraceae g__Cupriavidus s__gilardii      | p__Proteobacteria c__Gammaproteobacteria o__Pseudomonadales f__Moraxellaceae g__Acinetobacter s__             | 1        | 0      |
| OSC   | p__Proteobacteria c__Alphaproteobacteria o__Rhizobiales f__Brucellaceae g__Ochrobactrum s__intermedium         | p__Proteobacteria c__Gammaproteobacteria o__Pseudomonadales f__Moraxellaceae g__Acinetobacter s__             | 1        | 0      |
| OSC   | p__Proteobacteria c__Alphaproteobacteria o__Caulobacterales f__Caulobacteraceae g__Phenylobacterium s__        | p__Proteobacteria c__Gammaproteobacteria o__Pseudomonadales f__Moraxellaceae g__Acinetobacter s__             | 1        | 0      |
| OSC   | p__Proteobacteria c__Alphaproteobacteria o__Rhizobiales f__ g__ s__                                            | p__Proteobacteria c__Gammaproteobacteria o__Pseudomonadales f__Moraxellaceae g__Acinetobacter s__             | 1        | 0      |
| OSTPd | p__Proteobacteria c__Alphaproteobacteria o__Rhizobiales f__ g__ s__                                            | p__Proteobacteria c__Deltaproteobacteria o__Desulfuromonadales f__Pelobacteraceae g__Pelobacter s__           | -0.82995 | 0.0081 |
| OSTPd | p__Proteobacteria c__Alphaproteobacteria o__Rhizobiales f__ g__ s__                                            | p__Proteobacteria c__Deltaproteobacteria o__Desulfuromonadales f__Geobacteraceae g__Geobacter s__             | -0.69054 | 0.0035 |
| OSTPd | p__Bacteroidetes c__Bacteroidia o__Bacteroidales f__ g__ s__                                                   | p__Proteobacteria c__Alphaproteobacteria o__Rhizobiales f__ g__ s__                                           | -0.65548 | 0.0054 |
| OSTPd | p__Proteobacteria c__Betaproteobacteria o__Burkholderiales f__Oxalobacteraceae g__Cupriavidus s__gilardii      | p__Proteobacteria c__Deltaproteobacteria o__Desulfuromonadales f__Geobacteraceae g__Geobacter s__             | -0.6231  | 0.0062 |
| OSTPd | p__Proteobacteria c__Alphaproteobacteria o__Rhizobiales f__Methylobacteriaceae g__Methylobacterium s__         | p__Proteobacteria c__Deltaproteobacteria o__Desulfuromonadales f__Geobacteraceae g__Geobacter s__             | -0.60415 | 0.0055 |
| OSTPd | p__Proteobacteria c__Deltaproteobacteria o__Desulfuromonadales f__Geobacteraceae g__Geobacter s__              | p__Proteobacteria c__Deltaproteobacteria o__Desulfuromonadales f__Pelobacteraceae g__Pelobacter s__           | 0.920038 | 0.0084 |
| OSTPu | p__Proteobacteria c__Betaproteobacteria o__Burkholderiales f__Comamonadaceae g__Polaromonas s__                | p__Thermotogae c__Thermotogae o__Thermotogales f__Thermotogaceae g__Thermotoga s__                            | -0.89322 | 0.0006 |

|       |                                                                                                        |                                                                                                              |          |        |
|-------|--------------------------------------------------------------------------------------------------------|--------------------------------------------------------------------------------------------------------------|----------|--------|
| OSTPu | p_AC1 c_TA06 o_ f_ g_ s__                                                                              | p_Firmicutes c_Clostridia o_Clostridiales f_Tissierellaceae g_Tissierella_Soehngenia s__                     | -0.80759 | 0.0004 |
| OSTPu | p_Firmicutes c_Clostridia o_Clostridiales f_Peptostreptococcaceae g_ s__                               | p_Proteobacteria c_Betaproteobacteria o_Burkholderiales f_Comamonadaceae g_Polaromonas s__                   | -0.7345  | 0.0087 |
| OSTPu | p_Proteobacteria c_Betaproteobacteria o_Burkholderiales f_Comamonadaceae g_Hydrogenophaga s_palleronii | p_Proteobacteria c_Deltaproteobacteria o_Syntrophobacterales f_Syntrophaceae g_Syntrophus s__                | -0.71111 | 0.0097 |
| OSTPu | p_Firmicutes c_Clostridia o_Clostridiales f_Peptococcaceae g_Pelotomaculum s__                         | p_Proteobacteria c_Betaproteobacteria o_Hydrogenophilales f_Hydrogenophilaceae g_Thiobacillus s__            | 0.912775 | 0.01   |
| OSTPu | p_Chloroflexi c_Dehalococcoidetes o_GIF9 f_ g_ s__                                                     | p_Proteobacteria c_Betaproteobacteria o_Hydrogenophilales f_Hydrogenophilaceae g_Thiobacillus s__            | 0.925418 | 0.01   |
| OSTPu | p_Chloroflexi c_Dehalococcoidetes o_GIF9 f_ g_ s__                                                     | p_Proteobacteria c_Betaproteobacteria o_Rhodocyclales f_Rhodocyclaceae g_ s__                                | 0.941872 | 0.0064 |
| OSTPu | p_Chloroflexi c_Dehalococcoidetes o_GIF9 f_ g_ s__                                                     | p_Proteobacteria c_Betaproteobacteria o_Rhodocyclales f_Rhodocyclaceae g_Sulfuritalea s__                    | 0.954342 | 0.0026 |
| OSTPu | p_Chloroflexi c_Dehalococcoidetes o_GIF9 f_ g_ s__                                                     | p_Proteobacteria c_Betaproteobacteria o_Burkholderiales f_Comamonadaceae g_ s__                              | 0.954959 | 0.008  |
| OSTPu | p_Firmicutes c_Clostridia o_Clostridiales f_Peptococcaceae g_Pelotomaculum s__                         | p_Proteobacteria c_Betaproteobacteria o_Burkholderiales f_Comamonadaceae g_ s__                              | 0.958396 | 0.0058 |
| OSTPu | p_Proteobacteria c_Gammaproteobacteria o_PYR10d3 f_ g_ s__                                             | p_Proteobacteria c_Gammaproteobacteria o_Xanthomonadales f_Xanthomonadaceae g_ s__                           | 0.977145 | 0.0087 |
| OSTPu | p_Chloroflexi c_Anaerolineae o_Anaerolineales f_Anaerolinaceae g_SHD-231 s__                           | p_Proteobacteria c_Betaproteobacteria o_Burkholderiales f_Comamonadaceae g_Polaromonas s__                   | 0.979527 | 0.0055 |
| OSTPu | p_Proteobacteria c_Betaproteobacteria o_Hydrogenophilales f_Hydrogenophilaceae g_Thiobacillus s__      | p_Proteobacteria c_Betaproteobacteria o_Rhodocyclales f_Rhodocyclaceae g_Sulfuritalea s__                    | 0.98091  | 0.0093 |
| OSTPu | p_Proteobacteria c_Betaproteobacteria o_Rhodocyclales f_Rhodocyclaceae g_ s__                          | p_Proteobacteria c_Deltaproteobacteria o_Syntrophobacterales f_Syntrophaceae g_Syntrophus s__                | 0.982277 | 0.01   |
| OSTPu | p_Proteobacteria c_Betaproteobacteria o_Hydrogenophilales f_Hydrogenophilaceae g_Thiobacillus s__      | p_Proteobacteria c_Gammaproteobacteria o_Xanthomonadales f_Xanthomonadaceae g_ s__                           | 0.984076 | 0.0048 |
| OSTPu | p_Proteobacteria c_Betaproteobacteria o_Hydrogenophilales f_Hydrogenophilaceae g_Thiobacillus s__      | p_Proteobacteria c_Gammaproteobacteria o_PYR10d3 f_ g_ s__                                                   | 0.986003 | 0.0052 |
| OSTPu | p_Proteobacteria c_Betaproteobacteria o_Burkholderiales f_Comamonadaceae g_ s__                        | p_Proteobacteria c_Betaproteobacteria o_Hydrogenophilales f_Hydrogenophilaceae g_Thiobacillus s__            | 0.989547 | 0.004  |
| OSTPu | p_Proteobacteria c_Betaproteobacteria o_Hydrogenophilales f_Hydrogenophilaceae g_Thiobacillus s__      | p_Proteobacteria c_Deltaproteobacteria o_Syntrophobacterales f_Syntrophaceae g_Syntrophus s__                | 0.999945 | 0.0084 |
| OSTPu | p_Chloroflexi c_Dehalococcoidetes o_GIF9 f_ g_ s__                                                     | p_Proteobacteria c_Deltaproteobacteria o_Syntrophobacterales f_Syntrophaceae g_Syntrophus s__                | 1        | 0      |
| OSTPu | p_Proteobacteria c_Betaproteobacteria o_Burkholderiales f_Comamonadaceae g_ s__                        | p_Proteobacteria c_Deltaproteobacteria o_Syntrophobacterales f_Syntrophaceae g_Syntrophus s__                | 1        | 0      |
| OSTPu | p_Proteobacteria c_Betaproteobacteria o_Rhodocyclales f_Rhodocyclaceae g_Sulfuritalea s__              | p_Proteobacteria c_Deltaproteobacteria o_Syntrophobacterales f_Syntrophaceae g_Syntrophus s__                | 1        | 0      |
| Tb    | p_Acidobacteria c_Acidobacteriia o_Acidobacteriales f_Koribacteraceae g_Candidatus_Koribacter s__      | p_Proteobacteria c_Alphaproteobacteria o_Rhizobiales f_Hyphomicrobiaceae g_Devosia s__                       | -0.74831 | 0.0086 |
| Tb    | p_Acidobacteria c_iii1-8 o_DS-18 f_ g_ s__                                                             | p_AD3 c_ABS-6 o_ f_ g_ s__                                                                                   | 0.912588 | 0.0073 |
| Tb    | p_AD3 c_ABS-6 o_ f_ g_ s__                                                                             | p_Chloroflexi c_Ktedonobacteria o_Thermogemmatisporales f_Thermogemmatisporaceae g_ s__                      | 0.970769 | 0.0073 |
| Tp    | p_Acidobacteria c_iii1-8 o_DS-18 f_ g_ s__                                                             | p_Actinobacteria c_Actinobacteria o_Actinomycetales f_Microbacteriaceae g_Microbacterium s__                 | 0.885098 | 0.0098 |
| Tp    | p_Actinobacteria c_Actinobacteria o_Actinomycetales f_Microbacteriaceae g_Microbacterium s__           | p_Chloroflexi c_Ktedonobacteria o_Thermogemmatisporales f_Thermogemmatisporaceae g_ s__                      | 0.915172 | 0.0024 |
| Tp    | p_Actinobacteria c_Actinobacteria o_Actinomycetales f_Micrococcaceae g_ s__                            | p_Actinobacteria c_MB-A2-108 o_0319-7L14 f_ g_ s__                                                           | 0.91852  | 0.0078 |
| Tp    | p_Chloroflexi c_Ktedonobacteria o_Thermogemmatisporales f_Thermogemmatisporaceae g_ s__                | p_Chloroflexi c_S085 o_ f_ g_ s__                                                                            | 0.925952 | 0.0038 |
| Tp    | p_Actinobacteria c_Actinobacteria o_Actinomycetales f_Micrococcaceae g_ s__                            | p_Chloroflexi c_Ktedonobacteria o_Thermogemmatisporales f_Thermogemmatisporaceae g_ s__                      | 0.945306 | 0.0091 |
| Tp    | p_Actinobacteria c_Actinobacteria o_Actinomycetales f_Micrococcaceae g_ s__                            | p_Actinobacteria c_Thermoleophilia o_Gaiellales f_Gaiellaceae g_ s__                                         | 0.951573 | 0.0073 |
| Tp    | p_Actinobacteria c_Thermoleophilia o_Gaiellales f_Gaiellaceae g_ s__                                   | p_Chloroflexi c_Ktedonobacteria o_Thermogemmatisporales f_Thermogemmatisporaceae g_ s__                      | 0.956107 | 0.0032 |
| Tu    | p_Actinobacteria c_Actinobacteria o_Actinomycetales f_Pseudonocardiaceae g_Pseudonocardia s__          | p_Proteobacteria c_Alphaproteobacteria o_Sphingomonadales f_Sphingomonadaceae g_Novosphingobium s_capsulatum | -0.86427 | 0.0028 |
| Tu    | p_Actinobacteria c_Actinobacteria o_Actinomycetales f_Nocardoidaceae g_ s__                            | p_Proteobacteria c_Alphaproteobacteria o_Rhodospirillales f_Rhodospirillaceae g_ s__                         | -0.78114 | 0.0068 |
| Tu    | p_Actinobacteria c_Actinobacteria o_Actinomycetales f_Pseudonocardiaceae g_Pseudonocardia s__          | p_Proteobacteria c_Alphaproteobacteria o_Rhizobiales f_Bradyrhizobiaceae g_ s__                              | -0.75025 | 0.0088 |
| Tu    | p_Acidobacteria c_Solibacteres o_Solibacterales f_ g_ s__                                              | p_Proteobacteria c_Alphaproteobacteria o_Rhizobiales f_Bradyrhizobiaceae g_Bosea s_genosp.                   | 0.936646 | 0.0052 |
| Tu    | p_Proteobacteria c_Alphaproteobacteria o_Rhizobiales f_Bradyrhizobiaceae g_Bosea s_genosp.             | p_Proteobacteria c_Alphaproteobacteria o_Sphingomonadales f_Sphingomonadaceae g_Novosphingobium s__          | 0.977588 | 0.0044 |
| Tu    | p_Proteobacteria c_Alphaproteobacteria o_Caulobacterales f_Caulobacteraceae g_Arthrospira s_fusiformis | p_Proteobacteria c_Alphaproteobacteria o_Caulobacterales f_Caulobacteraceae g_Phenylobacterium s__           | 0.993837 | 0.0067 |
| Tu    | p_Acidobacteria c_Solibacteres o_Solibacterales f_ g_ s__                                              | p_Proteobacteria c_Alphaproteobacteria o_Sphingomonadales f_Sphingomonadaceae g_Novosphingobium s__          | 1        | 0      |

† Acronyms represent the following habitats: A: Arctic, C: China oil refineries, I: India oil refineries, DWH: Marine sediments, OSC: Oil sands core, OSTPu: Oil sands tailings pond upper, OSTPd: Oil sands tailings pond deep, Tb: Taiga bottom active layer, Tu: Taiga upper active layer, Tp: Taiga permafrost layer.

‡ OTUs classification using the following method: p\_\_|c\_\_|o\_\_|f\_\_|g\_\_|s\_\_ which is interpreted as Phylum|Class|Order|Family|Genus|species.



|                               |          |          |          |          |          |          |          |          |          |          |          |          |
|-------------------------------|----------|----------|----------|----------|----------|----------|----------|----------|----------|----------|----------|----------|
| <i>Opitutaceae</i>            | 0.099624 | 0        | 2.259738 | 0.158776 | 0.039129 | 0        | 0        | 0        | 0.029717 | 0        | 0        | 0        |
| <i>Oxalobacteraceae</i>       | 0.026566 | 0.531673 | 1.163839 | 0        | 0        | 0.212737 | 0.205447 | 0.693656 | 10.98035 | 0.024998 | 0.484314 | 1.279077 |
| <i>Pelobacteraceae</i>        | 0        | 0        | 0.008862 | 0        | 0        | 0        | 0        | 0        | 0        | 0.237484 | 3.219585 | 2.394998 |
| <i>Peptococcaceae</i>         | 0.009962 | 0        | 0.200275 | 0        | 0        | 0        | 0.004565 | 0.004475 | 0.010401 | 5.499628 | 1.793061 | 1.159545 |
| <i>Rhodobacteraceae</i>       | 0.413441 | 0.443475 | 0.37618  | 1.098203 | 9.310069 | 0.022793 | 0.039948 | 0.145444 | 0.434608 | 0.087494 | 0.057787 | 0.163593 |
| <i>Rhodocyclaceae</i>         | 2.666611 | 0.034782 | 0.047263 | 0.013231 | 0        | 0.117765 | 1.012015 | 0.376663 | 0.339267 | 11.05342 | 7.677472 | 16.38109 |
| <i>Sinobacteraceae</i>        | 6.804341 | 0.685709 | 1.174178 | 0        | 0        | 0.136759 | 0.182619 | 0.078316 | 0.586906 | 0        | 0        | 0.091612 |
| <i>Sphingomonadaceae</i>      | 2.789481 | 1.967688 | 2.184414 | 0.052925 | 0.032607 | 17.86988 | 28.56849 | 39.52721 | 1.649281 | 0.049997 | 0.181618 | 0.35336  |
| <i>Syntrophaceae</i>          | 0.514726 | 0        | 0.007385 | 0.136724 | 0        | 0.007598 | 0        | 0        | 0        | 5.291309 | 6.42266  | 1.583578 |
| <i>Syntrophobacteraceae</i>   | 0.318798 | 0        | 0.354469 | 0.158776 | 0        | 0        | 0.022827 | 0        | 0        | 0.612459 | 0.264171 | 2.277211 |
| <i>Thermogemmatisporaceae</i> | 0.019925 | 0.029813 | 0.864018 | 0.317553 | 0.026086 | 1.527145 | 5.512818 | 10.86355 | 0        | 0.037497 | 0.082553 | 0        |
| <i>Verrucomicrobiaceae</i>    | 0        | 0        | 2.454696 | 1.058509 | 5.438917 | 0.045586 | 0        | 0        | 0        | 0        | 0.033021 | 0.026175 |
| <i>Weeksellaceae</i>          | 1.354891 | 0.119254 | 0.177234 | 0.079388 | 3.665073 | 0        | 0        | 0.246136 | 0.995512 | 0        | 0.23115  | 0.575846 |
| <i>Xanthomonadaceae</i>       | 8.932981 | 5.704307 | 1.434122 | 6.351053 | 19.66879 | 0.163351 | 0.045655 | 0.231219 | 0.425941 | 1.024931 | 0.148596 | 0.418797 |
